# Supplementary material for: Near-Miss Symmetric Polyhedral Cages
Source: MDPI journal article supplement (doi:10.3390/sym15030717), 2023-03-13
Supplement: s1 [file s1]

# Near-miss Symmetric Polyhedral Cages : supplementary material

B. Piette and Á. Lukács

March 23, 2023

## 1 Possible symmetries of p-cages with Platonic and Archimedean hole-polyhedra

### 1.1 Distribution of Hole Edges

The diagram below list all the possible hole edges distribution for the regular solids.

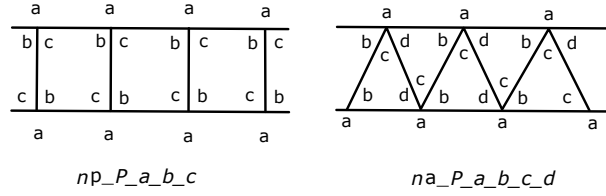

Figure S1: Distribution of the hole edges on the prism and antiprism.

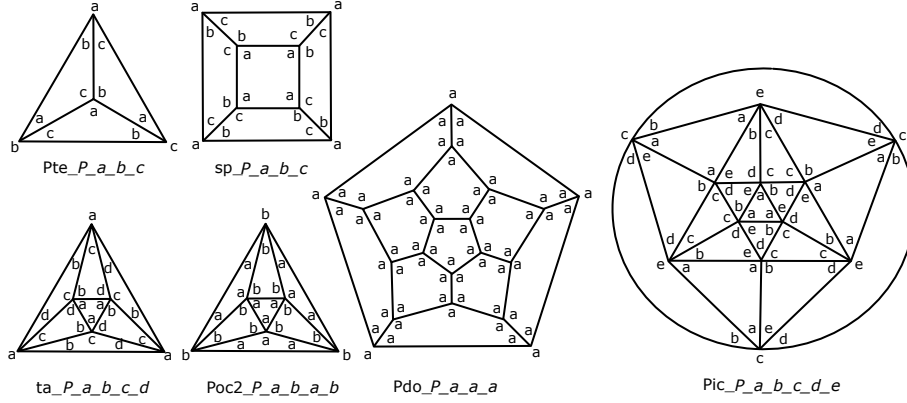

Figure S2: Distribution of the hole edges on the Platonic solids: the tetrahedron, the cube (the square prism), the octahedron (as a triangular antiprism but also a specific distribution), the dodecahedron and the icosahedron.

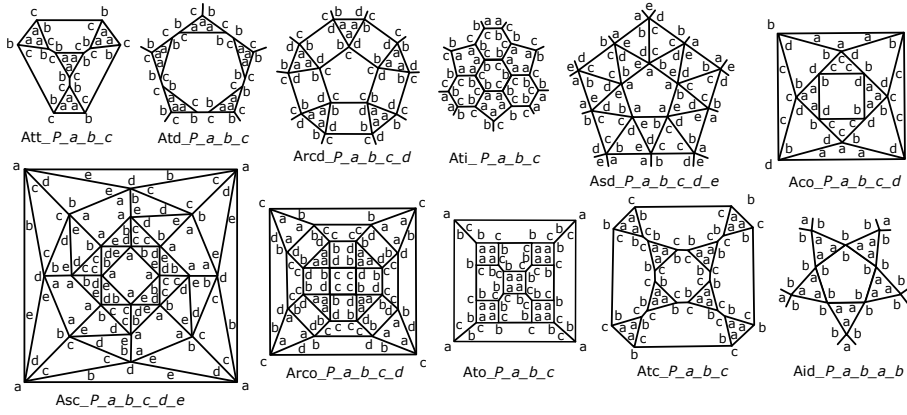

Figure S3: Distribution of the hole edges on the Archimedean solids. From top left to bottom right: the truncated cube, the truncated dodecahedron, the rhombicosidodecahedron, the truncated icosahedron, the snub cube, the cuboctahedron, the snub cube, the rhombicuboctahedron, the truncated octahedron, the truncated cube and the icosidodecahedron.

## 1.2 Platonic hole-polyhedra

In this appendix, we identify all the subgroups of the regular solids which act transitively on the solid's planar graphs. A group  $G$  acts transitively on a graph if for any vertex  $v$  of the graph, the set  $\{gv|g \in G\}$  is the set of all graph vertices. We use these transitive subgroups to identify all the possible distributions of hole-edges around the vertices of the hole-polyhedra so that the faces of the resulting p-cages are all equivalent. We shall consider the prism, anti-prism, Platonic solids as well as the Archimedean solids.

### 1.2.1 Dihedral symmetry: prism and anti-prism

The symmetry of the prism and anti-prism with an  $n$ -gon base is the dihedral group  $G = D_n$ . As the number of elements  $|D_n| = 2n$ , this matches the number of vertices of the prism or anti-prism. As a result no subgroup can act transitively as they would not have enough elements. The restriction on the labelling due to dihedral symmetry is shown in Fig S1.

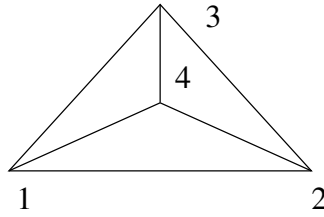

Figure S4: Labelling of the vertices of the tetrahedron

### 1.2.2 Tetrahedron

A set of generators for the symmetry group of the tetrahedron, with its vertices numbered as in Fig. S4, is

- a  $2\pi/3$  rotation ( $C_3$ ) around an axis connecting the centre of the face 1, 2, 3 with vertex 4,
- a  $\pi$  rotation ( $C_2$ ) around an axis connecting the centres of the edges 1, 2 and 3, 4.

These act as permutations  $(1, 2, 3)$  and  $(1, 2)(3, 4)$ , respectively. The symmetry group is isomorphic to  $A_4$ , the order of which is 12.

Of the subgroups of the tetrahedral groups, a normal subgroup isomorphic to the Klein Vierergruppe  $C_2 \times C_2$ ,  $\{I, (12)(34), (13)(24), (14)(23)\}$  corresponding to rotations around axes connecting the centres of opposite pairs of edges, acts transitively.

Applying the three non-trivial elements of the  $C_2 \times C_2$  subgroup to the tetrahedron can be used to move the three numbers of hole-adjacent points at one vertex to all others, yielding the labelled tetrahedron in Fig. S2. The full tetrahedral group requires, in addition, that all labels are equal ( $2\pi/3$  rotation around axis connecting vertex and opposite face centre).

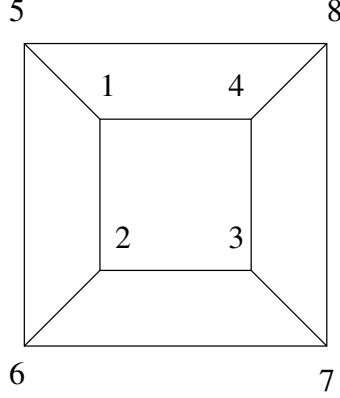

Figure S5: Numbering of the vertices of the cube

### 1.2.3 Cube

The orientation-preserving symmetry group of the cube is isomorphic to  $S_4$ , all permutations of the four principal diagonals [2, 3, 4]. In this case, we have used the computer algebra software GAP [5] to determine the subgroups, and their transitivity.

A set of generators for the group (see Fig. S5 for the numbering of the vertices) is:

- a  $\pi/2$  rotation ( $C_4$ ) around an axis connecting the centres of opposite faces such as 1-2-3-4 and 5-6-7-8,
- a  $\pi/2$  rotation around an axis connecting the centres of opposite faces such as 2-6-7-3 and 1-5-8-4.

These act as permutations  $(1, 2, 3, 4)(5, 6, 7, 8)$  and  $(2, 6, 7, 3)(1, 5, 8, 4)$ .

Three conjugate  $D_8$  subgroups (and the full group) are transitive. The former corresponds to the fact that a cube is also a four sided prism, in three different orientations (hence the 3 conjugate subgroups).

Choosing one orientation (keeping faces 1-2-3-4 and 5-6-7-8 invariant under a  $\pi/2$  rotations around the axis connecting their centres) is equivalent to choosing one of the  $D_3$  subgroups. Using this yields the labelling in Fig. S2 The entire group sets all labels equal (using for example a  $2\pi/3$  rotation around the axis connecting, the vertices 1 and 7).

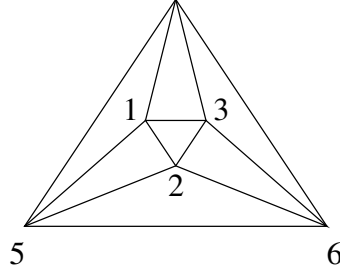

Figure S6: Numbering of the vertices of the octahedron

#### 1.2.4 Octahedron

The group of orientation-preserving symmetries of the octahedron is isomorphic to that of the cube, as the two polyhedra are dual [2], and thus to  $S_4$ , which is of order 24. Notice that, while the structure of the subgroups is the same, the notion of transitivity differs, as transitivity on vertices for the octahedron corresponds to the transitivity on the faces of the cube.

A suitable set of generators for the group is (see Fig. S6 for the numbering of the vertices) is:

- a  $2\pi/4$  rotation ( $C_4$ ) around an axis connecting opposite vertices such as 1 and 6,
- a  $2\pi/4$  rotation around an axis connecting opposite vertices such as 2 and 4.

The permutation representation of the two generators are  $(2, 3, 4, 5)$  and  $(1, 5, 6, 3)$ . The group generated is isomorphic to  $S_4$ .

In the case of the octahedron, of the 30 subgroups of  $S_4$ , the transitive ones are as follows:

- 4 (conjugate) subgroups isomorphic to  $S_3$  (order 6). One of these is generated by a  $\pi$  rotation around the axis connecting centre points of edges 1-3 and 5-6 and by a  $2\pi/3$  rotation around an axis containing the centres of two opposite faces such as 1-4-5 and 2-3-6. The other 3 are generated in a similar fashion;

- one normal subgroup  $A_4$  (order 12), corresponding to even permutations of the faces, generated by a  $\pi$  rotations around axes connecting opposite vertices;
- the full group.

As the (conjugate)  $S_3$  subgroups are not subgroups of the  $A_4$ , choosing an  $S_3$  (choosing another one is just another orientation), or the  $A_4$  yields different constraints of the labels added at the corners of the faces.

Using the  $S_3$  subgroup generated by the permutations  $(1, 5)(2, 4)(3, 6)$ , and  $(1, 2, 3)(4, 5, 6)$  (in cycle notation), corresponding to an  $S_3$  generated by a  $\pi$  rotation around an axis connecting centre points of edges 1-5 and 3-6 and by a  $2\pi/3$  rotation around an axis connecting the centres of opposite faces such as 1-2-3 and 4-5-6, which yields the left labelled octahedron in Fig. S2.

The second option is the  $A_4$  group. This yields the right labelled octahedron in Fig. S2.

Choosing the entire group, starting with the constraints obtained using  $A_4$ , and using in addition to those  $\pi/2$  rotations connecting one vertex to the opposite yields all equal labels.

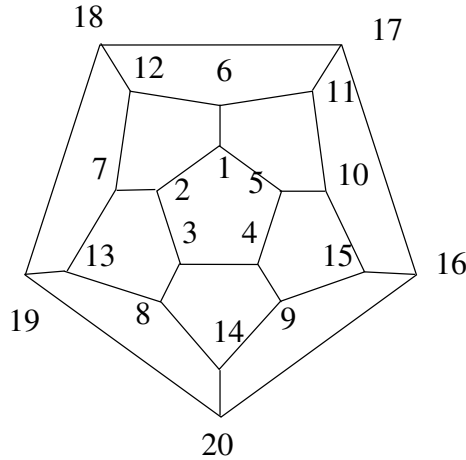

Figure S7: Numbering of the vertices of the dodecahedron

### 1.2.5 Dodecahedron

The dodecahedral symmetry group  $D$ , isomorphic to the icosahedral one,  $I$  (as the two polyhedra are dual), is isomorphic to  $A_5$  (corresponding to even permutations of five cubes inscribed in the dodecahedron). The group is generated by (see Fig. S7 for the numbering of the vertices)

- a  $2\pi/5$  rotation ( $C_5$ ) around an axis connecting the centres of opposite faces such as 1-2-3-4-5 and 16-17-18-19-20,
- a  $2\pi/5$  rotation around the axis connecting the centres opposite faces such as 1-6-12-7-2 and 9-15-16-20-14.

These act as permutations (1, 2, 3, 4, 5) (6, 7, 8, 9, 10) (11, 12, 13, 14, 15) (16, 17, 18, 19, 20), and (1, 6, 12, 7, 2) (3, 5, 11, 18, 13) (10, 17, 19, 8, 4) (9, 15, 16, 20, 14). The order of the group is 60, and it has 59 subgroups (including the trivial ones). The group has no subgroups acting transitively on the vertices of the dodecahedron, therefore, if all faces are equivalent, so are all their orientations (due to the rotations around axes connecting the centre of any face with that of its opposite), so all labels must be equal, as shown in Fig. S2.

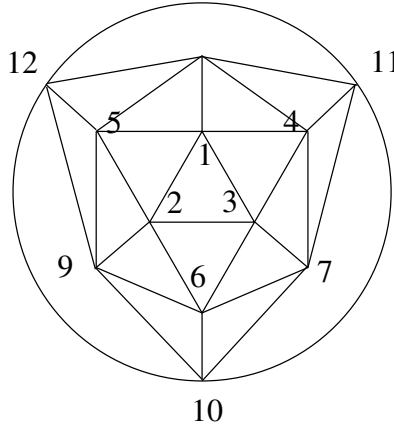

Figure S8: Numbering of the vertices of the icosahedron

### 1.2.6 Icosahedron

The icosahedral symmetry group  $I$  is isomorphic to the dodecahedral one (dual polyhedra), and to  $A_5$ . The group, in this case, is generated by, e.g., (see Fig. S8 for the numbering of the vertices)

- a  $2\pi/5$  rotation around an axis connecting vertices 1 and 10,
- a  $2\pi/5$  rotation around an axis connecting vertices 4 and 9.

These act as permutations (2, 3, 4, 8, 5) (9, 6, 7, 11, 12), and (1, 3, 7, 11, 8) (5, 2, 6, 10, 12).

The transitive subgroups are 5 (conjugate)  $A_4$  subgroups, corresponding to rotations of an inscribed tetrahedron (and, trivially, the icosahedral group itself). One of the  $A_4$  subgroups is generated by a  $2\pi/3$  rotation around an axis connecting the centres of the opposite faces such as 1-2-3 and 10-11-12, and one by an angle of  $\pi$  connecting the centres of opposite edges such as 2-6 and 8-11. Using this subgroup yield the labelling in Fig. 2. The whole group would yield all labels equal.

### 1.3 Archimedean hole-polyhedra

Note that the symmetry group of each of the Archimedean solids is also a finite rotation group, therefore, they must agree with the symmetry group of one of the Platonic solids. The group action is, however, different as it permutes a larger set of vertices. Vertex transitivity (or, similarly, face-transitivity) is thus different.

Some Archimedean solids are constructed as truncations of Platonic solids. We shall consider these first.

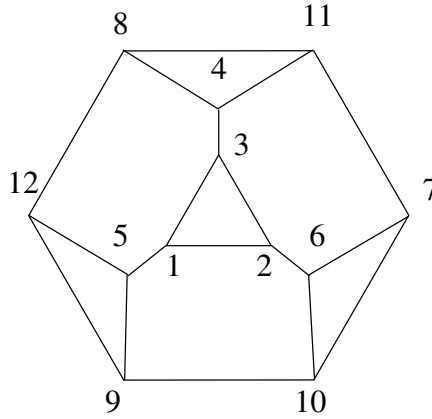

Figure S9: Numbering of the vertices of the truncated tetrahedron

#### 1.3.1 Truncated tetrahedron

The truncated tetrahedron is constructed by truncating the tetrahedron at  $1/3$  of the edges at all its vertices. The resulting polyhedron has regular hexagons and triangles as its faces. Its vertices are of two kinds: shared by a hexagon and a triangle or shared by two hexagons.

The symmetry group of the truncated tetrahedron is the same as that of the tetrahedron: orientation-preserving symmetries form a group  $T \cong A_4$ . In this case, none of the subgroups (except the full group) is transitive. As



different kinds of edges meet at vertices, there is no symmetry exchanging the labels around a vertex. The restrictions due to the symmetry result in the labelling shown in Fig. S3.

Generators for the symmetry group are as follows (see Fig. S9 for the numbering of the vertices):

- a rotation by an angle  $2\pi/3$  around an axis connecting the centres of the opposite faces such as 1-2-3 and 7-11-8-12-9-10, and
- a rotation by an angle  $\pi$  around an axis connecting the centres of the opposite edges such as 3-4 and 9-10.

Permutation representations of the generators are  $(1, 2, 3)(4, 5, 6)(7, 8, 9)(10, 11, 12)$  ( $C_3$ ) and  $(1, 11)(2, 8)(3, 4)(5, 7)(6, 12)(9, 10)$  ( $C_2$ ).

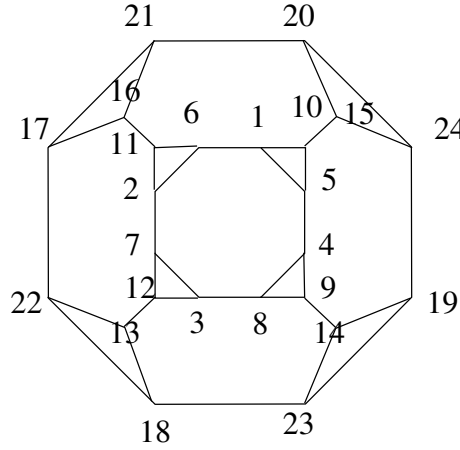

Figure S10: Numbering of the vertices of the truncated cube

### 1.3.2 Truncated cube

The truncated cube is constructed by truncating the cube at  $a/(2 + \sqrt{2})$  of its edges, resulting in a solid whose faces are regular octagons and triangles of edge length  $a/(1 + \sqrt{2})$ , where  $a$  is the length of the edges of the cube.

The resulting solid has 24 vertices, 6 octagonal and 8 triangular faces, 12 edges shared by two octagons and 24 edges shared by an octagon and a triangle.

The symmetry group is the same as that of the cube, generated by (see Fig. S10 for the numbering of the vertices)

- a  $2\pi/4$  rotation ( $C_4$ ) around an axis connecting the centres of the opposite faces such as 1-6-2-7-3-8-4-5 and 17-22-18-23-19-24-20-2,

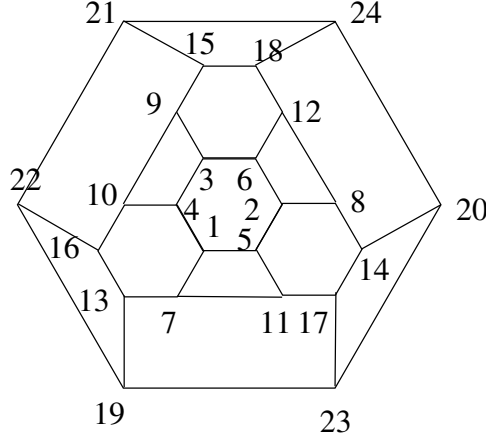

Figure S11: Numbering of the vertices of the truncated octahedron

- a  $2\pi/4$  rotation ( $C_4$ ) around an axis connecting the centres of opposite faces such as 3-12-13-18-23-14-9-8 and 11-16-21-20-15-10-1-6.

These generators act as the permutations  $(1, 2, 3, 4)(5, 6, 7, 8)(9, 10, 11, 12)(13, 14, 15, 16)(17, 18, 19, 20)(21, 22, 23, 24)$  and  $(1, 11, 21, 15)(5, 2, 17, 24)(3, 13, 23, 9)(4, 7, 22, 19)(6, 16, 20, 10)(8, 12, 18, 14)$ . The generated group is isomorphic to  $S_4$ . None of the subgroups (except the full group) act transitively on the vertices. As at the vertices, similarly to the case of the truncated tetrahedron, different kinds of edges (shared by two octahedra and shared by an octahedron and a triangle) meet, the orientation is not changed by the group, therefore, not all labels need to be equal. By labelling around one vertex and spreading it around the truncated cube, the labelling in Fig. S3. is obtained.

### 1.3.3 Truncated octahedron

The truncated octahedron is obtained by truncating the octahedron at  $1/3$  of the edge length, resulting in a solid whose faces are squares and regular hexagons. The solid has 8 hexagonal and 6 square faces, 24 vertices, 12 edges shared by two hexagons (remnant of the original edges of the octahedron) and 24 edges shared by a hexagon and a square.

The symmetry group of the truncated octahedron is generated by the following set of generators - derived from the ones used in the case of the octahedron - (see Fig. S11 for the numbering of the vertices),

- a  $2\pi/4$  rotation ( $C_4$ ) connecting the centres of opposite faces such as 4-3-9-10 and 14-17-23-20,

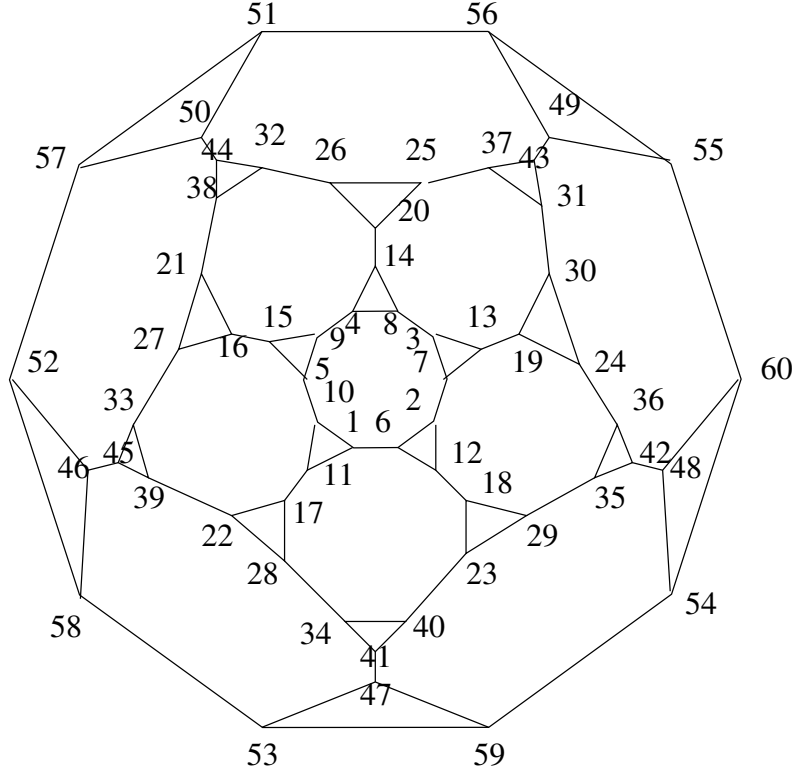

Figure S12: Numbering of the vertices of the truncated dodecahedron

- a  $2\pi/4$  rotation connecting the centres of the opposite faces such as 1-7-11-17 and 21-24-18-15.

The resulting permutation representations are  $(4, 3, 9, 10)(14, 20, 23, 17)(1, 6, 15, 16)(8, 24, 19, 11)(5, 12, 21, 13)(7, 2, 18, 22)$  and  $(1, 7, 11, 5)(15, 21, 24, 18)(4, 13, 17, 2)(9, 22, 20, 12)(10, 19, 14, 6)(3, 16, 23, 8)$ . The generated group is isomorphic to  $S_4$ , and agrees with the symmetry group of the octahedron.

None of the subgroups (except the full symmetry group) acts transitively on the vertices. Using the symmetry to restrict labels yield the labelling shown on Fig. S3..

### 1.3.4 Truncated dodecahedron

The truncated dodecahedron is obtained from the dodecahedron by truncating its vertices with triangles. It has 12 decagonal faces and 20 triangular ones. It has 30 edges shared by two decagons and 60 edges shared by a decagon and a triangle, and 60 vertices.

The symmetry group, similarly to the case of the dodecahedron, is generated by (see Fig. S12 for the numbering of the vertices)

- a  $2\pi/5$  ( $C_5$ ) rotation around an axis connecting the centres of opposite faces such as 1-6-2-3-7-3-8-4-9-10 and 51-57-52-58-53-59-54-60-55-56,
- a  $2\pi/5$  ( $C_5$ ) rotation around an axis connecting the centres of opposite faces such as 4-14-20-26-32-38-21-16-15-9 and 23-29-35-42-48-54-59-47-41-40.

The permutation representation of these is (1, 2, 3, 4, 5) (6, 7, 8, 9, 10) (11, 12, 13, 14, 15) (16, 17, 18, 19, 20) (21, 22, 23, 24, 25) (26, 27, 28, 29, 30) (31, 32, 33, 34, 35) (36, 37, 38, 39, 40) (41, 42, 43, 44, 45) (46, 47, 48, 49, 50) (51, 52, 53, 54, 55) (56, 57, 58, 59, 60) and (4, 20, 32, 21, 15) (9, 14, 26, 38, 16) (5, 8, 25, 44, 27) (10, 3, 37, 50, 33) (11, 7, 31, 51, 45) (1, 13, 43, 57, 39) (17, 2, 30, 56, 46) (6, 19, 49, 52, 22) (28, 12, 24, 55, 58) (34, 18, 36, 60, 53) (41, 23, 35, 48, 59) (40, 29, 42, 54, 47). The generated group is isomorphic to  $A_5$ , i.e., the corresponding finite rotation group is the same as in the case of the dodecahedron. There are no transitive subgroups (except the full symmetry group). The symmetries restrict the addition of labels to that shown in Fig. S3.

### 1.3.5 Truncated icosahedron

The truncated icosahedron is obtained by replacing the vertices of the icosahedron with pentagons. The resulting polyhedron has 60 vertices, 20 hexagonal faces (remainders of the original triangular ones) and 12 pentagonal ones, and 30 edges shared by two pentagons and 60 shared by a pentagon and a hexagon.

The generators of the symmetry group can be chosen (the same rotations as the ones for the icosahedron) as: (see Fig. S13 for the numbering of the vertices)

- a  $2\pi/5$  rotation ( $C_5$ ) around an axis connecting the centres of the opposite faces such as 3-6-12-21-9 and 46-52-58-55-49,
- a  $2\pi/5$  rotation around an axis connecting the centres of the opposite faces such as 14-23-29-26-17 and 31-34-43-40-37.

The permutation actions corresponding to these are (3, 6, 12, 21, 9) (4, 2, 17, 33, 15) (10, 5, 14, 39, 24) (1, 8, 26, 36, 18) (19, 11, 23, 42, 30) (7, 20, 29, 45, 27) (31, 16, 35, 53, 48) (13, 32, 47, 51, 37) (34, 25, 44, 59, 54) (22, 38, 50, 57, 40) (43, 28, 41, 56, 60) (46, 52, 58, 55, 49) and (14, 23, 29, 26, 17) (8, 35,

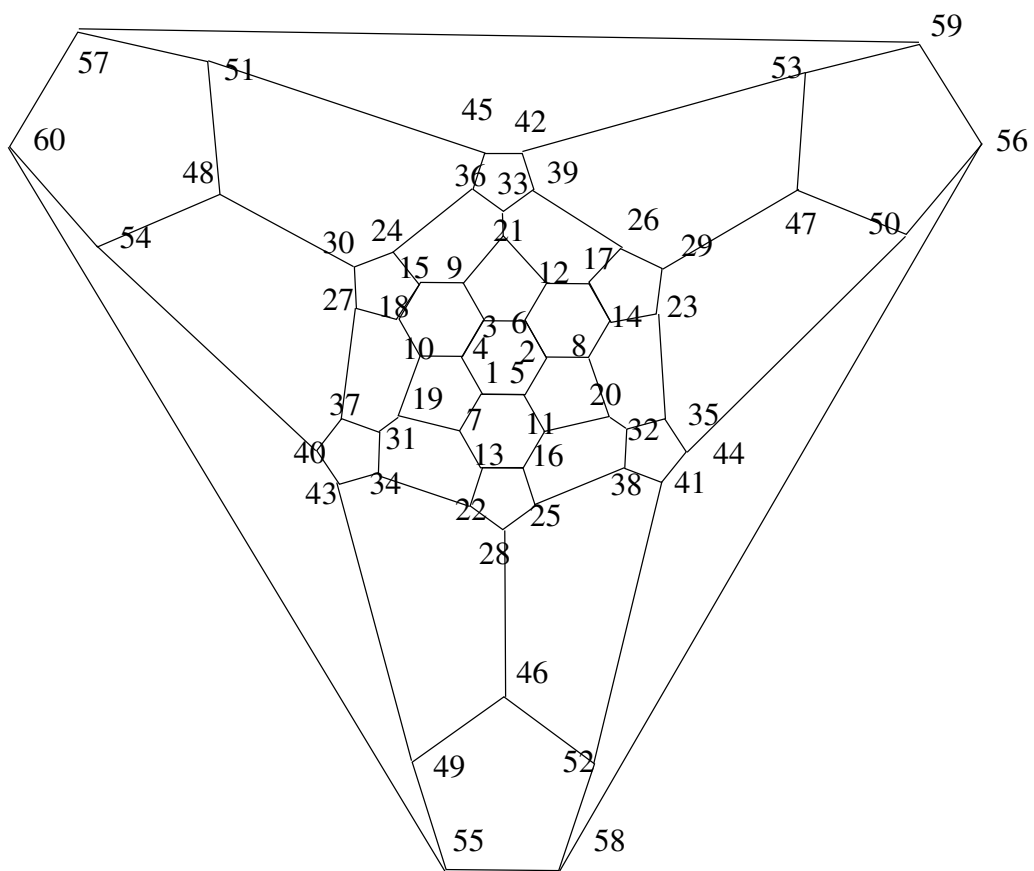

Figure S13: Numbering of the vertices of the truncated icosahedron

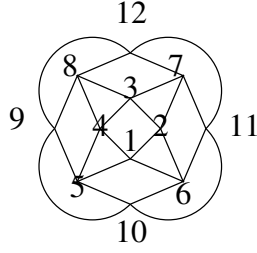

Figure S14: Numbering of the vertices of the cuboctahedron

47, 39, 12) (2, 32, 50, 42, 21) (20, 44, 53, 33, 6) (5, 38, 56, 45, 9) (11, 41, 59, 36, 3) (1, 25, 58, 51, 15) (16, 52, 57, 24, 4) (7, 28, 55, 48, 18) (13, 46, 60, 30, 10) (19, 22, 49, 54, 27) (31, 34, 43, 40, 37). The generated group is the same as the symmetry group of the icosahedron, isomorphic to  $A_5$ . There are no transitive subgroups (apart from the full group).

The group restricts the labelling to the one in Fig. S3.

### 1.3.6 Cuboctahedron

The cuboctahedron is constructed by truncating the vertices of a cube with triangles, at halfway points of the edges (nothing remains of the original edges of the cube). The resulting polyhedron has 8 triangular and 6 square faces, 14 edges (all shared by one square and one triangular face) and 12 vertices.

The symmetry group is generated by (see Fig. S14 for the numbering of the vertices)

- a  $2\pi/4$  rotation ( $C_4$ ) around an axis connecting the centres of opposite faces such as 1-2-3-4 and 9-10-11-12,
- a  $2\pi/4$  rotation connecting the centres of opposite faces such as 3-7-12-8 and 1-6-10-5.

The generators act as permutations (1, 2, 3, 4) (5, 6, 7, 8) (9, 10, 11, 12) and (3, 7, 12, 8) (2, 11, 9, 4) (1, 6, 10, 5), respectively.

The group generated is the same rotation group as for the cube, isomorphic to  $S_4$ . There is one transitive subgroup, isomorphic to  $A_4$ , generated by  $2\pi/3$  ( $C_3$ ) rotations around the main diagonals of the cube. This restricts the labelling of the polyhedron to that shown in Fig. S3. The full group restricts all labels  $a = c$  and  $b = d$ .

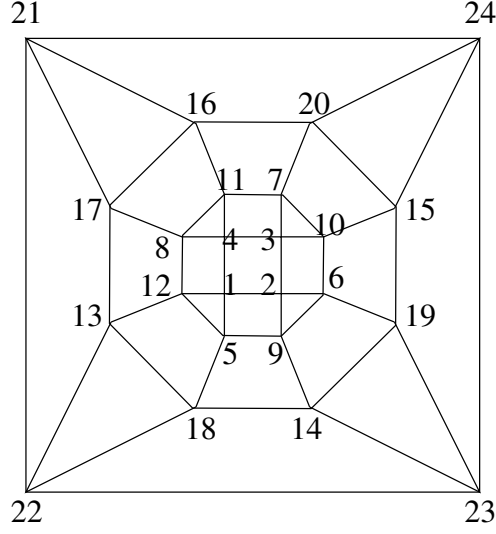

Figure S15: Numbering of the vertices of the rhombicuboctahedron

### 1.3.7 Rhombicuboctahedron

Cutting off the vertices of a cube, and replacing them with triangles, and cutting off what remains of the edges and replacing them with squares yields the rhombicuboctahedron. It has 24 vertices, 18 square and 8 triangular faces and 48 edges.

The symmetry group, similar to the case of the cube, is generated by (see Fig. S15 for the numbering of the vertices)

- a  $2\pi/4$  rotation ( $C_4$ ) around an axis connecting the centres of opposite faces such as 1-2-3-4 and 21-23-23-14,
- a  $2\pi/4$  rotation around an axis connecting the centres of opposite faces such as 6-19-15-10 and 8-12-13-17.

These act as permutations  $(1, 2, 3, 4)(5, 6, 7, 8)(9, 10, 11, 12)(13, 14, 15, 16)(17, 18, 19, 20)(21, 22, 23, 24)$  and  $(6, 19, 15, 10)(9, 23, 20, 3)(2, 14, 24, 7)(5, 22, 16, 4)(1, 18, 21, 11)(8, 12, 13, 17)$ . The generated group is the same as for the cube, isomorphic to  $S_4$ . None of the subgroups (except the full group) act transitively. The group restricts the labelling of the rhombicuboctahedron to the one shown in Fig. S3.

### 1.3.8 Truncated cuboctahedron

The truncated cuboctahedron is topologically equivalent to a truncation of the cuboctahedron, but deformation is needed to ensure maximal symmetry.

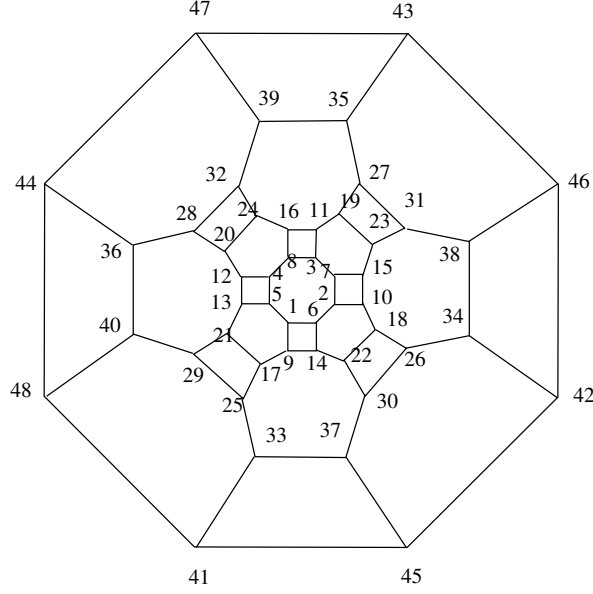

Figure S16: Numbering of the vertices of the truncated cuboctahedron

It has 48 vertices, 12 square, 8 hexagonal, and 6 octagonal faces, 24 edges shared by a square and a hexagon, 24 edges shared by a square and an octagon, and 24 edges shared by a hexagon and an octagon.

The symmetries of the truncated cuboctahedron are generated by the following transformations (see Fig. S16 for the numbering of the vertices):

- a  $2\pi/4$  rotation ( $C_4$ ) around an axis connecting the centres of opposite faces 1-5-2-6-3-7-8 and 41-45-42-46-43-47-48,
- a  $2\pi/4$  rotation around an axis connecting the centres of opposite faces such as 12-20-28-36-40-29-21-13 and 10-15-23-31-38-34-26-18.

These generators act as the permutations  $(1, 2, 3, 4)(5, 6, 7, 8)(9, 10, 11, 12)(13, 14, 15, 16)(17, 18, 19, 20)(21, 22, 23, 24)(25, 26, 27, 28)(29, 30, 31, 32)(33, 34, 35, 36)(37, 38, 39, 40)(41, 42, 43, 44)(45, 46, 47, 48)$  and  $(12, 28, 40, 21)(13, 20, 36, 29)(4, 32, 48, 17)(5, 24, 44, 25)(8, 39, 41, 9)(1, 16, 47, 33)(3, 35, 45, 14)(6, 11, 43, 37)(7, 27, 42, 22)(2, 19, 46, 30)(15, 31, 34, 18)(10, 23, 38, 26)$ . The generated group is the same as for the cube, isomorphic to  $S_4$ .

In the case of the truncated cuboctahedron, even the full symmetry group is not transitive, the orbit of vertex 1 is 1, 2, 3, 4, 13, 14, 15, 16, 17, 18, 19, 20, 29, 30, 31, 32, 33, 34, 35, 36, 45, 46, 47, 48 and that of vertex 5 is 5, 6, 7, 8, 9, 10, 11, 12, 21, 22, 23, 24, 25, 26, 27, 28, 37, 38, 39, 40, 41, 42,



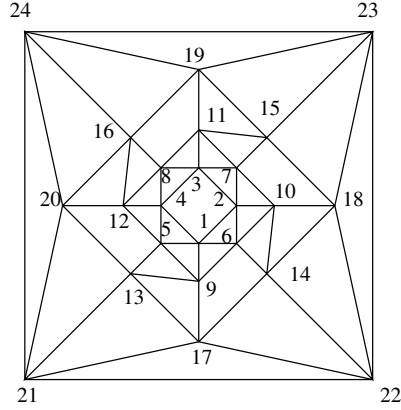

Figure S17: Numbering of the vertices of the snub cube

43, 44. The symmetry group can be made transitive by including reflections, e.g., extending it from  $O$  (the octagonal group) to  $O_h$  (octagonal group with a reflection in the symmetry plane of the cube).

For all the proper subgroups, the orbit of a vertex is smaller than for the whole group.

### 1.3.9 Snub cube

Taking a cube, pulling out and rotating in the same direction all of its faces until they can be connected with equilateral triangles of the same edge length yields the snub cube. It has 24 vertices, 6 square and 32 triangular faces (of which 8 is only shares edges with other triangles, close to the vertices of the original cube, and 24 share one edge with a square, one with another such triangle and one with a triangle that only shares edges with triangles), and 12 edges shared between triangles sharing edges with cubes and 24 edges shared between triangles sharing edges with squares and triangles not sharing edges with squares (in total, 36 edges shared by two triangles), and 24 edges shared by a triangle and a square, in total, 60 edges.

Generators for the symmetry group of the snub cube can be the same rotations as for the cube, now being: (see Fig. S17 for the numbering of the vertices)

- a  $2\pi/4$  rotation ( $C_4$ ) around an axis connecting the centres of opposite faces such as 1-2-3-4 and 21-21-23-24
- a  $2\pi/4$  rotation around an axis connecting the centres of opposite faces such as 7-10-18-15 and 5-13-20-12.

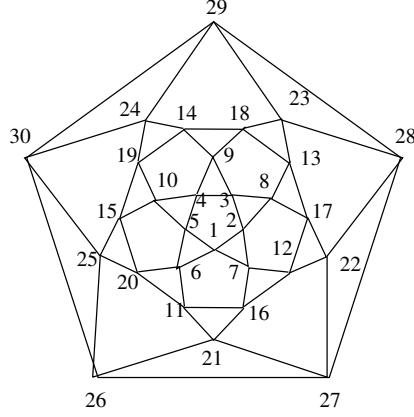

Figure S18: Numbering of the vertices of the icosidodecahedron

These act on the vertices as the permutations  $(1, 2, 3, 4) (5, 6, 7, 8) (9, 10, 11, 12) (13, 14, 15, 16) (17, 18, 19, 20) (21, 22, 23, 24)$  and  $(7, 10, 18, 15) (2, 14, 23, 11) (3, 6, 22, 19) (1, 17, 24, 8) (4, 9, 21, 16) (5, 13, 20, 12)$ . The group generated is the symmetry group of the cube. There are no transitive subgroups (apart from the full group). The symmetry restricts the labelling of the snub cube to the one shown in Fig. S3.

### 1.3.10 Icosidodecahedron

The icosahedron stems from the rectification (total truncation: cutting of vertices at the half of the edges) of the icosahedron. It has 30 vertices, 12 pentagonal and 20 triangular faces (the former replacing the vertices, and the latter the remnants of the faces of the icosahedron), and 60 edges, all shared by a triangular and a pentagonal face.

The symmetries of the icosidodecahedron are generated by the same rotations that generate the symmetries of the icosahedron or the dodecahedron (see Fig. S18 for the numbering of the vertices),

- a  $2\pi/5$  rotation ( $C_5$ ) around an axis connecting the centres of opposite faces such as 1-2-3-4-5 and 26-27-28-29-30,
- a  $2\pi/5$  rotation around an axis connecting the centres of opposite faces such as 4-9-14-19-10 and 12-16-21-27-22.

These generators act as the permutations  $(1, 2, 3, 4, 5) (6, 7, 8, 9, 10) (11, 12, 13, 14, 15) (16, 17, 18, 19, 20) (21, 22, 23, 24, 25) (26, 27, 28, 29, 30)$  and  $(4, 9, 14, 19, 10) (3, 18, 24, 15, 5) (8, 23, 30, 20, 1) (2, 13, 29, 25, 6) (17, 28, 26, 11, 7) (22, 27, 21, 16, 12)$ , respectively. The generated group is the

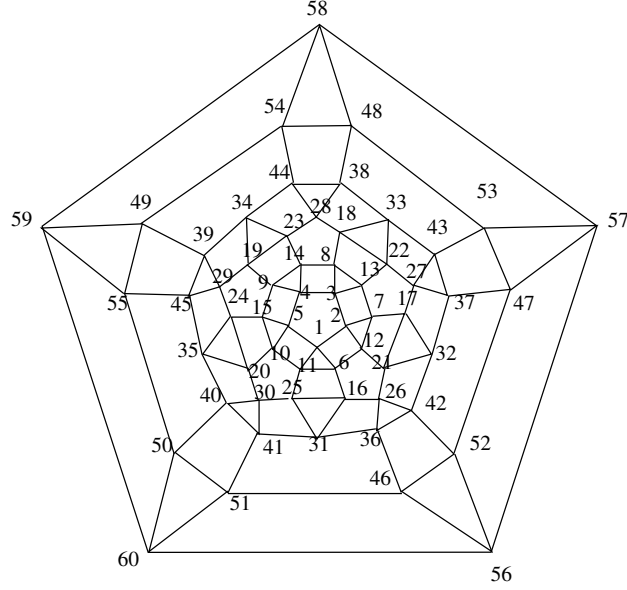

Figure S19: Numbering of the vertices of the rhombicosadodecahedron

same as for the icosahedron and the dodecahedron, isomorphic to  $A_5$ . There are no transitive proper subgroups. The symmetry restricts the labelling to the one in Fig. S3.

### 1.3.11 Rhombicosidodecahedron

Expanding an icosahedron by moving its faces diagonally out, then doing the same with the dual dodecahedron, and finally patching the square holes yields the rhombicosadodecahedron. It has 60 vertices, 20 triangular, 12 pentagonal and 30 square faces, 60 edges shared by a triangle and a square, 60 edges shared by a pentagon and a square, and 120 edges.

Its symmetries are generated by the same rotations as for the dodecahedron and icosahedron (see Fig. S19 for the numbering of the vertices):

- a  $2\pi/5$  rotation ( $C_5$ ) around an axis connecting the centres of opposite faces such as 1-2-3-4-5 and 56-57-58-59-60,
- a  $2\pi/5$  rotation around an axis connecting the centres of opposite faces such as 9-19-29-24-15 and 32-37-47-52-42.

These act as permutations  $(1, 2, 3, 4, 5)(6, 7, 8, 9, 10)(11, 12, 13, 14, 15)(16, 17, 18, 19, 20)(21, 22, 23, 24, 25)(26, 27, 28, 29, 30)(31, 32, 33, 34, 35)(36, 37, 38, 39, 40)(41, 42, 43, 44, 45)(46, 47, 48, 49, 50)(51, 52, 53, 54, 55)(56, 57, 58, 59, 60)$  and  $(9, 19, 29, 24, 15)(14, 34, 45, 20, 5)(4, 23, 39,$

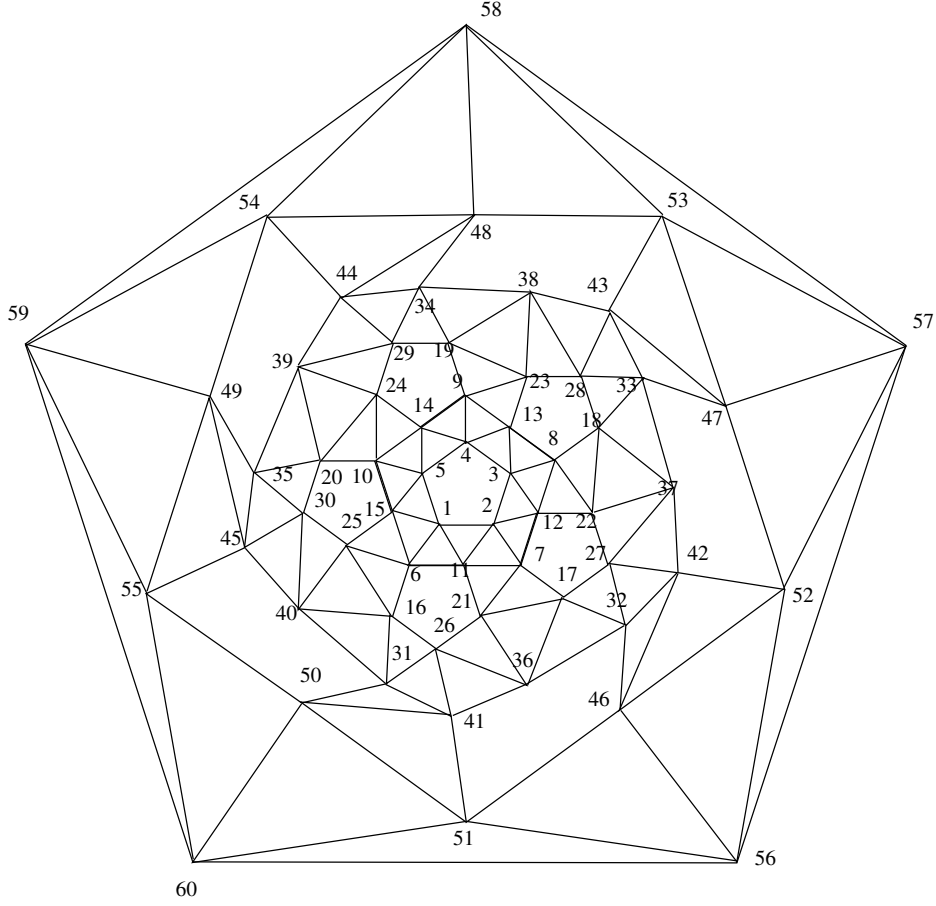

Figure S20: Numbering of the vertices of the snub dodecahedron

35, 10) (8, 44, 55, 30, 1) (3, 28, 49, 40, 11) (18, 54, 50, 25, 2) (13, 38, 59, 41, 6) (33, 58, 51, 16, 7) (22, 48, 60, 31, 12) (43, 57, 46, 26, 17) (27, 53, 56, 36, 21) (37, 47, 52, 42, 32), respectively. The generated finite rotational group is the same as for the dodeca- and icosahedra, isomorphic to  $A_5$ . None of the subgroups (except for the full group) are transitive. The symmetry restricts the labelling to the one shown in Fig. S3.

### 1.3.12 Snub dodecahedron

Pulling out the faces of a dodecahedron, rotating them slightly, and filling up the holes with equilateral triangles yields the snub dodecahedron. It has 12 pentagonal and 80 triangular faces, 60 vertices and 150 edges.

One can take the same two rotators as for the dodecahedron to generate the symmetry group (see Fig. S20 for the numbering of the vertices),

- a  $2\pi/5$  rotation ( $C_5$ ) around an axis connecting the centres of the opposite faces 1-2-3-4-5 and 56-57-58-59-60,
- a  $2\pi/5$  rotation around an axis connecting the centres of opposite faces such as 9-19-29-24-14 and 32-46-51-41-36.

These generators act on the vertices as the permutations (1, 2, 3, 4, 5) (6, 7, 8, 9, 10) (11, 12, 13, 14, 15) (16, 17, 18, 19, 20) (21, 22, 23, 24, 25) (26, 27, 28, 29, 30) (31, 32, 33, 34, 35) (36, 37, 38, 39, 40) (41, 42, 43, 44, 45) (46, 47, 48, 49, 50) (51, 52, 53, 54, 55) (56, 57, 58, 59, 60) and (9, 19, 29, 24, 14) (23, 34, 39, 10, 4) (13, 38, 44, 20, 5) (28, 48, 35, 15, 3) (8, 43, 54, 30, 1) (33, 58, 45, 6, 12) (18, 53, 49, 25, 2) (22, 47, 59, 40, 11) (37, 57, 55, 16, 7) (27, 52, 60, 31, 21) (42, 56, 50, 26, 17) (32, 46, 51, 41, 36). The generated rotation group is the same as for the tetrahedron, isomorphic to  $A_5$ . There are no transitive subgroups (apart from the full group). The symmetry restricts the labelling to the one shown in Fig. S3.

## 2 List of all symmetric p-cage (P=6 to 20)

### 2.1 tp

#### 2.1.1 Regular Cages

| name         | $\theta$ | name         | $\theta$ | name         | $\theta$ |
|--------------|----------|--------------|----------|--------------|----------|
| tp_P6_1_1_1  | 70.5288  | tp_P12_5_2_2 | 90.0     | tp_P17_4_5_5 | 64.1514  |
| tp_P7_2_1_1  | 82.4277  | tp_P13_2_4_4 | 49.3306  | tp_P17_6_4_4 | 80.5452  |
| tp_P8_1_1_3  | 54.7356  | tp_P13_4_3_3 | 77.352   | tp_P18_3_6_6 | 46.5233  |
| tp_P8_1_2_2  | 54.7356  | tp_P14_3_4_4 | 62.5857  | tp_P18_5_5_5 | 70.5288  |
| tp_P8_3_1_1  | 90.0     | tp_P14_5_3_3 | 82.4277  | tp_P18_7_4_4 | 84.157   |
| tp_P9_2_2_2  | 70.5288  | tp_P15_2_5_5 | 37.3774  | tp_P19_4_6_6 | 57.8939  |
| tp_P10_1_3_3 | 37.3774  | tp_P15_4_4_4 | 70.5288  | tp_P19_6_5_5 | 75.3301  |
| tp_P10_3_2_2 | 79.1877  | tp_P15_6_3_3 | 86.521   | tp_P19_8_4_4 | 87.2579  |
| tp_P11_2_3_3 | 59.9817  | tp_P16_3_3_7 | 54.7356  | tp_P20_3_7_7 | 37.3774  |
| tp_P11_4_2_2 | 85.2384  | tp_P16_3_5_5 | 54.7356  | tp_P20_4_4_9 | 54.7356  |
| tp_P12_1_4_4 | 0.0      | tp_P16_5_4_4 | 76.1638  | tp_P20_5_6_6 | 65.1989  |
| tp_P12_2_2_5 | 54.7356  | tp_P16_7_3_3 | 90.0     | tp_P20_7_5_5 | 79.1877  |
| tp_P12_3_3_3 | 70.5288  | tp_P17_2_6_6 | 21.1796  | tp_P20_9_4_4 | 90.0     |

### 2.1.2 Near-Miss Cages

| name         | $c_l$     | $c_a$   | $\Delta_l$ | $\Delta_a$ | $\theta$ |
|--------------|-----------|---------|------------|------------|----------|
| tp_P17_3_5_6 | 0.24302   | 1.75698 | 0.00120    | 0.00120    | 50.59050 |
| tp_P17_3_4_7 | 0.20268   | 1.79732 | 0.00246    | 0.00246    | 51.20460 |
| tp_P20_4_6_7 | 0.232844  | 1.76716 | 0.00381    | 0.00382    | 54.43960 |
| tp_P13_2_3_5 | 0.255679  | 1.74432 | 0.00445    | 0.00446    | 50.06680 |
| tp_P19_3_6_7 | 0.173955  | 1.82605 | 0.00467    | 0.00468    | 42.76160 |
| tp_P18_3_5_7 | 0.209116  | 1.79088 | 0.00522    | 0.00522    | 47.53820 |
| tp_P19_2_7_7 | 0.0840802 | 1.91592 | 0.00658    | 0.00659    | 0.91321  |
| tp_P14_2_4_5 | 0.235174  | 1.76483 | 0.00688    | 0.00688    | 44.49420 |
| tp_P20_4_5_8 | 0.197143  | 1.80286 | 0.00804    | 0.00804    | 53.32720 |
| tp_P9_1_2_3  | 0.310459  | 1.68954 | 0.00865    | 0.00865    | 47.55280 |
| tp_P12_2_3_4 | 0.349726  | 1.65027 | 0.00952    | 0.00952    | 54.02260 |
| tp_P16_3_4_6 | 0.252337  | 1.74766 | 0.00963    | 0.00964    | 53.49070 |
| tp_P18_4_5_6 | 0.285603  | 1.7144  | 0.01185    | 0.01185    | 60.44580 |
| tp_P15_3_4_5 | 0.320995  | 1.67901 | 0.01259    | 0.01260    | 57.95570 |
| tp_P20_3_6_8 | 0.16972   | 1.83028 | 0.01285    | 0.01285    | 40.90790 |
| tp_P19_4_4_8 | 0.18359   | 1.81641 | 0.01420    | 0.01420    | 55.23200 |
| tp_P19_4_5_7 | 0.236266  | 1.76373 | 0.01420    | 0.01421    | 56.34880 |
| tp_P16_2_5_6 | 0.21473   | 1.78527 | 0.01438    | 0.01438    | 33.09920 |
| tp_P19_3_5_8 | 0.18145   | 1.81855 | 0.01459    | 0.01460    | 46.34880 |
| tp_P18_3_4_8 | 0.178073  | 1.82193 | 0.01544    | 0.01547    | 50.68280 |
| tp_P18_2_6_7 | 0.207627  | 1.79237 | 0.01747    | 0.01747    | 15.07760 |
| tp_P20_2_7_8 | 0.202376  | 1.79762 | 0.01754    | 0.01755    | 0.84086  |
| tp_P19_5_5_6 | 0.317864  | 1.68214 | 0.01961    | 0.01961    | 67.28760 |
| tp_P15_3_3_6 | 0.229254  | 1.77075 | 0.02089    | 0.02089    | 55.52000 |
| tp_P15_2_4_6 | 0.214563  | 1.78544 | 0.02101    | 0.02101    | 42.72120 |
| tp_P14_2_3_6 | 0.215702  | 1.7843  | 0.02292    | 0.02294    | 49.25620 |
| tp_P20_3_5_9 | 0.176574  | 1.82343 | 0.02447    | 0.02452    | 46.41060 |
| tp_P20_6_5_6 | 0.350329  | 1.64967 | 0.02514    | 0.02512    | 72.43260 |
| tp_P17_8_3_3 | 0.317546  | 1.68245 | 0.02573    | 0.02576    | 90.00000 |
| tp_P16_4_4_5 | 0.371274  | 1.62873 | 0.02584    | 0.02585    | 66.55370 |
| tp_P19_3_4_9 | 0.219242  | 1.78076 | 0.02774    | 0.02776    | 50.78780 |
| tp_P14_1_5_5 | 0.0809069 | 1.91909 | 0.02771    | 0.02778    | 0.43542  |
| tp_P18_4_4_7 | 0.228608  | 1.77139 | 0.02902    | 0.02904    | 57.25880 |
| tp_P17_2_5_7 | 0.215253  | 1.78475 | 0.02935    | 0.02940    | 33.49810 |
| tp_P20_5_5_7 | 0.263326  | 1.73667 | 0.03041    | 0.03045    | 63.17850 |
| tp_P11_1_3_4 | 0.293476  | 1.70652 | 0.03093    | 0.03093    | 32.68610 |
| tp_P19_2_6_8 | 0.205841  | 1.79416 | 0.03296    | 0.03296    | 19.36920 |
| tp_P11_2_2_4 | 0.303823  | 1.69618 | 0.03355    | 0.03354    | 56.23000 |

| name          | $c_l$     | $c_a$    | $\Delta_l$ | $\Delta_a$ | $\theta$ |
|---------------|-----------|----------|------------|------------|----------|
| tp_P17_5_4_5  | 0.419964  | 1.58004  | 0.03434    | 0.03435    | 72.69300 |
| tp_P16_2_4_7  | 0.222173  | 1.77783  | 0.03527    | 0.03527    | 43.18280 |
| tp_P13_3_3_4  | 0.438535  | 1.56147  | 0.03533    | 0.03535    | 65.41260 |
| tp_P13_1_4_5  | 0.299279  | 1.70072  | 0.03609    | 0.03609    | 1.38100  |
| tp_P17_4_4_6  | 0.291186  | 1.70881  | 0.03636    | 0.03642    | 61.49960 |
| tp_P15_1_5_6  | 0.231674  | 1.76833  | 0.03836    | 0.03847    | 0.51086  |
| tp_P10_1_2_4  | 0.300497  | 1.6995   | 0.03927    | 0.03931    | 46.17800 |
| tp_P18_6_4_5  | 0.468612  | 1.53139  | 0.04016    | 0.04015    | 77.39020 |
| tp_P14_3_3_5  | 0.315451  | 1.68455  | 0.04082    | 0.04082    | 59.13430 |
| tp_P13_6_2_2  | 0.423985  | 1.57601  | 0.04091    | 0.04093    | 90.00000 |
| tp_P15_2_3_7  | 0.261861  | 1.73814  | 0.04137    | 0.04144    | 49.58290 |
| tp_P18_2_5_8  | 0.212846  | 1.78715  | 0.04138    | 0.04144    | 35.90480 |
| tp_P20_5_4_8  | 0.203695  | 1.79631  | 0.04367    | 0.04366    | 59.17840 |
| tp_P20_2_6_9  | 0.200418  | 1.79958  | 0.04413    | 0.04414    | 25.85570 |
| tp_P19_7_4_5  | 0.515947  | 1.48405  | 0.04436    | 0.04440    | 81.17740 |
| tp_P18_9_3_3  | 0.284412  | 1.71559  | 0.04723    | 0.04724    | 90.00000 |
| tp_P16_1_6_6  | 0.0609548 | 1.93905  | 0.04746    | 0.04762    | 0.35237  |
| tp_P20_8_4_5  | 0.563364  | 1.43664  | 0.04761    | 0.04763    | 84.34160 |
| tp_P17_2_4_8  | 0.226571  | 1.77343  | 0.04781    | 0.04790    | 44.45170 |
| tp_P14_4_3_4  | 0.521256  | 1.47874  | 0.04957    | 0.04955    | 73.04300 |
| tp_P10_2_2_3  | 0.512501  | 1.4875   | 0.04961    | 0.04966    | 63.41880 |
| tp_P19_2_5_9  | 0.210187  | 1.78981  | 0.05104    | 0.05109    | 38.43630 |
| tp_P17_4_3_7  | 1.46297   | 0.537032 | 0.00238    | 0.05253    | 58.93630 |
| tp_P17_1_6_7  | 0.11863   | 1.88137  | 0.05554    | 0.05556    | 0.39475  |
| tp_P16_1_5_7  | 0.264869  | 1.73513  | 0.05580    | 0.05587    | 0.59776  |
| tp_P18_5_4_6  | 0.334991  | 1.66501  | 0.05621    | 0.05622    | 68.02960 |
| tp_P7_1_1_2   | 0.403195  | 1.5968   | 0.05759    | 0.05763    | 59.11690 |
| tp_P12_1_3_5  | 0.295298  | 1.7047   | 0.05768    | 0.05773    | 35.23240 |
| tp_P15_5_3_4  | 0.599654  | 1.40035  | 0.05795    | 0.05795    | 78.57290 |
| tp_P19_5_4_7  | 0.258793  | 1.74121  | 0.05820    | 0.05828    | 62.75380 |
| tp_P20_2_5_10 | 0.206748  | 1.79325  | 0.05918    | 0.05917    | 40.56600 |
| tp_P18_2_4_9  | 0.242047  | 1.75795  | 0.05993    | 0.06001    | 45.22220 |
| tp_P18_1_7_7  | 0.0467053 | 1.95329  | 0.06235    | 0.06250    | 0.28573  |
| tp_P18_1_6_8  | 0.179481  | 1.82052  | 0.06240    | 0.06251    | 0.50919  |
| tp_P16_6_3_4  | 0.67471   | 1.32529  | 0.06329    | 0.06326    | 82.86750 |
| tp_P14_1_4_6  | 0.286695  | 1.71331  | 0.06332    | 0.06331    | 15.48960 |
| tp_P16_4_3_6  | 0.272917  | 1.72708  | 0.06511    | 0.06513    | 60.78360 |
| tp_P17_7_3_4  | 0.747804  | 1.2522   | 0.06671    | 0.06671    | 86.34320 |



| name          | $c_l$     | $c_a$   | $\Delta_l$ | $\Delta_a$ | $\theta$ |
|---------------|-----------|---------|------------|------------|----------|
| tp_P19_1_7_8  | 0.0730102 | 1.92699 | 0.06839    | 0.06863    | 0.38050  |
| tp_P19_1_6_9  | 0.214117  | 1.78588 | 0.06859    | 0.06864    | 0.59625  |
| tp_P19_6_4_6  | 0.380828  | 1.61917 | 0.06932    | 0.06938    | 73.28060 |
| tp_P11_1_2_5  | 0.326003  | 1.674   | 0.06943    | 0.06942    | 47.10770 |
| tp_P14_7_2_2  | 0.367784  | 1.63222 | 0.07295    | 0.07300    | 90.00000 |
| tp_P18_8_3_4  | 0.762352  | 1.23765 | 0.07344    | 0.07346    | 89.27690 |
| tp_P20_1_8_8  | 0.0372193 | 1.96278 | 0.07381    | 0.07408    | 0.26479  |
| tp_P20_1_7_9  | 0.112902  | 1.8871  | 0.07401    | 0.07408    | 0.28586  |
| tp_P17_1_5_8  | 0.253464  | 1.74654 | 0.07508    | 0.07508    | 2.52452  |
| tp_P15_4_3_5  | 0.385335  | 1.61466 | 0.07657    | 0.07662    | 66.91720 |
| tp_P20_1_6_10 | 0.221269  | 1.77873 | 0.07695    | 0.07694    | 1.31698  |
| tp_P11_3_2_3  | 0.682013  | 1.31799 | 0.07707    | 0.07711    | 73.53050 |
| tp_P9_4_1_1   | 0.636966  | 1.36303 | 0.07715    | 0.07719    | 90.00000 |
| tp_P13_1_3_6  | 0.296982  | 1.70302 | 0.07758    | 0.07761    | 38.65320 |
| tp_P20_7_4_6  | 0.427534  | 1.57247 | 0.07784    | 0.07785    | 77.50550 |
| tp_P15_1_4_7  | 0.274422  | 1.72558 | 0.07916    | 0.07918    | 26.68650 |
| tp_P19_9_3_4  | 0.77386   | 1.22614 | 0.08004    | 0.08009    | 89.99990 |
| tp_P20_6_4_7  | 0.295182  | 1.70482 | 0.08241    | 0.08245    | 67.93200 |
| tp_P18_1_5_9  | 0.240736  | 1.75926 | 0.08692    | 0.08700    | 16.96410 |
| tp_P12_4_2_3  | 0.829319  | 1.17068 | 0.08897    | 0.08896    | 80.29390 |
| tp_P16_1_4_8  | 0.264827  | 1.73517 | 0.09032    | 0.09040    | 32.36130 |
| tp_P20_10_3_4 | 0.714698  | 1.2853  | 0.09141    | 0.09142    | 89.99990 |
| tp_P13_5_2_3  | 0.957654  | 1.04235 | 0.09390    | 0.09389    | 85.22290 |
| tp_P14_1_3_7  | 0.303688  | 1.69631 | 0.09446    | 0.09449    | 40.79510 |
| tp_P16_5_3_5  | 0.461102  | 1.5389  | 0.09829    | 0.09833    | 73.33760 |

## 2.2 sp

### 2.2.1 Regular Cages

| name         | $\theta$ | name         | $\theta$ | name         | $\theta$ |
|--------------|----------|--------------|----------|--------------|----------|
| sp_P6_1_1_1  | 54.7356  | sp_P13_4_3_3 | 67.7128  | sp_P17_6_4_4 | 73.4696  |
| sp_P7_2_1_1  | 76.8063  | sp_P14_3_4_4 | 37.1105  | sp_P18_5_5_5 | 54.7356  |
| sp_P8_1_2_2  | 0.0      | sp_P14_5_3_3 | 76.8063  | sp_P18_7_4_4 | 79.8441  |
| sp_P8_3_1_1  | 90.0     | sp_P15_4_4_4 | 54.7356  | sp_P19_4_6_6 | 22.9912  |
| sp_P9_2_2_2  | 54.7356  | sp_P15_6_3_3 | 83.9668  | sp_P19_6_5_5 | 63.9828  |
| sp_P10_3_2_2 | 71.0393  | sp_P16_3_5_5 | 0.0      | sp_P19_8_4_4 | 85.2469  |
| sp_P11_2_3_3 | 29.945   | sp_P16_5_4_4 | 65.5302  | sp_P20_5_6_6 | 43.4027  |
| sp_P11_4_2_2 | 81.7335  | sp_P16_7_3_3 | 90.0     | sp_P20_7_5_5 | 71.0393  |
| sp_P12_3_3_3 | 54.7356  | sp_P17_4_5_5 | 40.9602  | sp_P20_9_4_4 | 90.0     |
| sp_P12_5_2_2 | 90.0     |              |          |              |          |

### 2.2.2 Near-Miss Cages

| name         | $c_l$    | $c_a$   | $\Delta_l$ | $\Delta_a$ | $\theta$ |
|--------------|----------|---------|------------|------------|----------|
| sp_P18_5_4_6 | 0.228051 | 1.77195 | 0.00223    | 0.00224    | 55.05170 |
| sp_P20_6_5_6 | 0.236614 | 1.76339 | 0.00415    | 0.00414    | 59.05680 |
| sp_P15_4_3_5 | 0.256631 | 1.74337 | 0.00419    | 0.00419    | 55.34570 |
| sp_P19_5_5_6 | 0.18105  | 1.81895 | 0.00492    | 0.00492    | 49.65790 |
| sp_P20_6_4_7 | 0.216294 | 1.78371 | 0.00641    | 0.00642    | 58.27750 |
| sp_P17_5_4_5 | 0.27928  | 1.72072 | 0.00665    | 0.00665    | 59.64460 |
| sp_P17_5_3_6 | 0.231742 | 1.76826 | 0.00761    | 0.00760    | 58.83380 |
| sp_P16_4_4_5 | 0.203195 | 1.79681 | 0.00801    | 0.00802    | 48.84610 |
| sp_P12_3_2_4 | 0.285217 | 1.71478 | 0.00814    | 0.00815    | 56.04670 |
| sp_P14_4_2_5 | 0.467735 | 1.53226 | 0.00518    | 0.00885    | 59.97050 |
| sp_P14_4_3_4 | 0.336995 | 1.663   | 0.01145    | 0.01145    | 60.37680 |
| sp_P18_5_3_7 | 0.238663 | 1.76134 | 0.01323    | 0.01323    | 57.58510 |
| sp_P13_3_3_4 | 0.225315 | 1.77469 | 0.01400    | 0.01400    | 47.83140 |
| sp_P18_4_5_6 | 0.186055 | 1.81395 | 0.01534    | 0.01534    | 34.78880 |
| sp_P13_2_4_4 | 0.235797 | 1.7642  | 0.01563    | 0.01565    | 0.57853  |
| sp_P20_5_5_7 | 0.164068 | 1.83593 | 0.01619    | 0.01620    | 46.28460 |
| sp_P18_3_6_6 | 0.173883 | 1.82612 | 0.01645    | 0.01646    | 0.55220  |
| sp_P19_5_4_7 | 0.191758 | 1.80824 | 0.01673    | 0.01674    | 52.72620 |
| sp_P19_6_3_7 | 0.269153 | 1.73085 | 0.01274    | 0.01708    | 60.98040 |
| sp_P20_4_6_7 | 0.189774 | 1.81023 | 0.01752    | 0.01752    | 10.90230 |
| sp_P19_6_4_6 | 0.266972 | 1.73303 | 0.01861    | 0.01862    | 61.81800 |
| sp_P18_6_4_5 | 0.344308 | 1.65569 | 0.01910    | 0.01911    | 67.46430 |
| sp_P9_2_1_3  | 0.550601 | 1.4494  | 0.01992    | 0.01992    | 57.71870 |
| sp_P11_3_2_3 | 0.414553 | 1.58545 | 0.02128    | 0.02129    | 61.24050 |
| sp_P17_4_4_6 | 0.179085 | 1.82092 | 0.02439    | 0.02439    | 45.57860 |
| sp_P16_4_3_6 | 0.202128 | 1.79787 | 0.02456    | 0.02455    | 53.51130 |
| sp_P15_3_4_5 | 0.229171 | 1.77083 | 0.02500    | 0.02501    | 29.37290 |
| sp_P17_8_3_3 | 0.317578 | 1.68242 | 0.02574    | 0.02575    | 90.00000 |
| sp_P10_2_2_3 | 0.248141 | 1.75186 | 0.02616    | 0.02619    | 46.70060 |
| sp_P17_3_5_6 | 0.232655 | 1.76735 | 0.02696    | 0.02699    | 0.88124  |
| sp_P19_3_6_7 | 0.215211 | 1.78479 | 0.02816    | 0.02816    | 0.55206  |
| sp_P16_5_3_5 | 0.306485 | 1.69351 | 0.02871    | 0.02874    | 62.27310 |
| sp_P20_3_7_7 | 0.133349 | 1.86665 | 0.02888    | 0.02890    | 0.46143  |
| sp_P20_5_4_8 | 0.163329 | 1.83667 | 0.03054    | 0.03053    | 52.01960 |
| sp_P19_7_4_5 | 0.3882   | 1.6118  | 0.03104    | 0.03104    | 73.63760 |
| sp_P15_5_3_4 | 0.426915 | 1.57309 | 0.03291    | 0.03292    | 69.11570 |
| sp_P19_4_5_7 | 0.188104 | 1.8119  | 0.03321    | 0.03327    | 31.73380 |
| sp_P14_3_3_5 | 0.19878  | 1.80122 | 0.03811    | 0.03810    | 45.03050 |

| name         | $c_l$     | $c_a$   | $\Delta_l$ | $\Delta_a$ | $\theta$ |
|--------------|-----------|---------|------------|------------|----------|
| sp_P20_7_4_6 | 0.293269  | 1.70673 | 0.03871    | 0.03874    | 67.17690 |
| sp_P15_2_5_5 | 0.162893  | 1.83711 | 0.03928    | 0.03931    | 0.41258  |
| sp_P8_2_1_2  | 0.433547  | 1.56645 | 0.03979    | 0.03983    | 61.79650 |
| sp_P18_6_3_6 | 0.260679  | 1.73932 | 0.03999    | 0.04000    | 62.91360 |
| sp_P13_6_2_2 | 0.42363   | 1.57637 | 0.04092    | 0.04092    | 90.00000 |
| sp_P20_8_4_5 | 0.436038  | 1.56396 | 0.04148    | 0.04149    | 78.73080 |
| sp_P18_4_4_7 | 0.179656  | 1.82034 | 0.04172    | 0.04172    | 44.64160 |
| sp_P13_3_2_5 | 0.326373  | 1.67363 | 0.04182    | 0.04184    | 54.67910 |
| sp_P14_2_4_5 | 0.291954  | 1.70805 | 0.04309    | 0.04309    | 0.62786  |
| sp_P12_2_3_4 | 0.298043  | 1.70196 | 0.04399    | 0.04405    | 18.16580 |
| sp_P13_4_2_4 | 0.346968  | 1.65303 | 0.04417    | 0.04417    | 62.55840 |
| sp_P20_7_3_7 | 0.251189  | 1.74881 | 0.03946    | 0.04482    | 63.59530 |
| sp_P17_4_3_7 | 0.225474  | 1.77453 | 0.04542    | 0.04543    | 52.73430 |
| sp_P20_3_6_8 | 0.213967  | 1.78603 | 0.04680    | 0.04681    | 0.53807  |
| sp_P18_9_3_3 | 0.2837    | 1.7163  | 0.04721    | 0.04719    | 90.00000 |
| sp_P16_2_5_6 | 0.218776  | 1.78122 | 0.04868    | 0.04876    | 0.41258  |
| sp_P20_4_5_8 | 0.187874  | 1.81213 | 0.04993    | 0.04993    | 31.69730 |
| sp_P18_3_5_7 | 0.227994  | 1.77201 | 0.05041    | 0.05045    | 0.79424  |
| sp_P16_3_4_6 | 0.230018  | 1.76998 | 0.05106    | 0.05113    | 26.72810 |
| sp_P16_6_3_4 | 0.497418  | 1.50258 | 0.05166    | 0.05166    | 75.85880 |
| sp_P15_5_2_5 | 0.354813  | 1.64519 | 0.04319    | 0.05423    | 63.43310 |
| sp_P17_2_6_6 | 0.120165  | 1.87984 | 0.05619    | 0.05645    | 0.30768  |
| sp_P19_4_4_8 | 0.186822  | 1.81318 | 0.05751    | 0.05753    | 45.21740 |
| sp_P17_6_3_5 | 0.347449  | 1.65255 | 0.05980    | 0.05985    | 67.72240 |
| sp_P7_1_1_2  | 0.42556   | 1.57444 | 0.06096    | 0.06101    | 45.52350 |
| sp_P12_4_2_3 | 0.560182  | 1.43982 | 0.06170    | 0.06169    | 71.07600 |
| sp_P10_1_3_3 | 0.223495  | 1.7765  | 0.06247    | 0.06250    | 0.32247  |
| sp_P15_3_3_6 | 0.217473  | 1.78253 | 0.06251    | 0.06262    | 44.86440 |
| sp_P18_2_6_7 | 0.132492  | 1.86751 | 0.06335    | 0.06349    | 0.28815  |
| sp_P11_2_2_4 | 0.254987  | 1.74501 | 0.06439    | 0.06438    | 44.80350 |
| sp_P10_3_1_3 | 0.537032  | 1.46297 | 0.06039    | 0.06535    | 63.06220 |
| sp_P17_2_5_7 | 0.260199  | 1.7398  | 0.06645    | 0.06648    | 0.41164  |
| sp_P17_7_3_4 | 0.571665  | 1.42833 | 0.06650    | 0.06651    | 81.23240 |
| sp_P19_2_7_7 | 0.0914458 | 1.90855 | 0.06927    | 0.06946    | 0.29931  |
| sp_P19_2_6_8 | 0.194928  | 1.80507 | 0.06953    | 0.06983    | 0.45039  |
| sp_P19_7_3_6 | 0.287368  | 1.71263 | 0.06993    | 0.06998    | 66.28260 |
| sp_P19_3_5_8 | 0.223369  | 1.77663 | 0.07054    | 0.07058    | 1.44251  |
| sp_P20_4_4_9 | 0.212667  | 1.78733 | 0.07289    | 0.07298    | 44.69940 |

| name          | $c_l$    | $c_a$   | $\Delta_l$ | $\Delta_a$ | $\theta$ |
|---------------|----------|---------|------------|------------|----------|
| sp_P14_7_2_2  | 0.368143 | 1.63186 | 0.07303    | 0.07302    | 90.00000 |
| sp_P17_3_4_7  | 0.22854  | 1.77146 | 0.07323    | 0.07326    | 28.50190 |
| sp_P20_2_7_8  | 0.089966 | 1.91003 | 0.07489    | 0.07494    | 0.32946  |
| sp_P15_2_4_6  | 0.284022 | 1.71598 | 0.07502    | 0.07510    | 0.57290  |
| sp_P20_2_6_9  | 0.228096 | 1.7719  | 0.07627    | 0.07637    | 0.39091  |
| sp_P18_8_3_4  | 0.648082 | 1.35192 | 0.07714    | 0.07716    | 85.50910 |
| sp_P9_4_1_1   | 0.636393 | 1.36361 | 0.07711    | 0.07718    | 90.00000 |
| sp_P9_1_2_3   | 0.402797 | 1.5972  | 0.08207    | 0.08207    | 0.62145  |
| sp_P11_1_3_4  | 0.319965 | 1.68004 | 0.08329    | 0.08334    | 0.30462  |
| sp_P13_2_3_5  | 0.295254 | 1.70475 | 0.08346    | 0.08351    | 16.57750 |
| sp_P19_9_3_4  | 0.721177 | 1.27882 | 0.08357    | 0.08358    | 88.90960 |
| sp_P16_3_3_7  | 0.250472 | 1.74953 | 0.08542    | 0.08543    | 44.88810 |
| sp_P18_7_3_5  | 0.386735 | 1.61326 | 0.08655    | 0.08651    | 72.10480 |
| sp_P18_2_5_8  | 0.252014 | 1.74799 | 0.08716    | 0.08727    | 0.41924  |
| sp_P20_3_5_9  | 0.218172 | 1.78183 | 0.08725    | 0.08738    | 2.02104  |
| sp_P16_6_2_5  | 0.321414 | 1.67859 | 0.08992    | 0.08997    | 66.02100 |
| sp_P18_3_4_8  | 0.22591  | 1.77409 | 0.08996    | 0.09012    | 32.49690 |
| sp_P20_10_3_4 | 0.713768 | 1.28623 | 0.09146    | 0.09142    | 89.99990 |
| sp_P13_5_2_3  | 0.685515 | 1.31448 | 0.09182    | 0.09186    | 78.33940 |
| sp_P14_5_2_4  | 0.419558 | 1.58044 | 0.09408    | 0.09409    | 67.71380 |
| sp_P20_8_3_6  | 0.310555 | 1.68944 | 0.09531    | 0.09536    | 69.04870 |

## 2.3 pp

### 2.3.1 Regular Cages

| name         | $\theta$ | name         | $\theta$ | name         | $\theta$ |
|--------------|----------|--------------|----------|--------------|----------|
| pp_P6_1_1_1  | 37.3774  | pp_P13_4_3_3 | 58.534   | pp_P18_5_5_5 | 37.3774  |
| pp_P7_2_1_1  | 71.6905  | pp_P14_5_3_3 | 71.6905  | pp_P18_7_4_4 | 75.9544  |
| pp_P8_3_1_1  | 90.0     | pp_P15_4_4_4 | 37.3774  | pp_P19_6_5_5 | 52.862   |
| pp_P9_2_2_2  | 37.3774  | pp_P15_5_2_5 | 63.4349  | pp_P19_8_4_4 | 83.4512  |
| pp_P10_3_1_3 | 63.4349  | pp_P15_6_3_3 | 81.6822  | pp_P20_5_6_6 | 0.0      |
| pp_P10_3_2_2 | 63.4349  | pp_P16_5_4_4 | 55.2417  | pp_P20_7_3_7 | 63.4349  |
| pp_P11_4_2_2 | 78.5862  | pp_P16_7_3_3 | 90.0     | pp_P20_7_5_5 | 63.4349  |
| pp_P12_3_3_3 | 37.3774  | pp_P17_6_4_4 | 66.945   | pp_P20_9_4_4 | 90.0     |
| pp_P12_5_2_2 | 90.0     |              |          |              |          |

### 2.3.2 Near-Miss Cages

| name         | $c_l$    | $c_a$   | $\Delta_l$ | $\Delta_a$ | $\theta$ |
|--------------|----------|---------|------------|------------|----------|
| pp_P18_6_4_5 | 0.236708 | 1.76329 | 0.00012    | 0.00012    | 59.92350 |
| pp_P17_4_5_5 | 0.213441 | 1.78656 | 0.00416    | 0.00416    | 1.22351  |
| pp_P20_7_4_6 | 0.246289 | 1.75371 | 0.00588    | 0.00588    | 62.40940 |
| pp_P18_6_3_6 | 0.221789 | 1.77821 | 0.00597    | 0.00598    | 61.34260 |
| pp_P15_5_3_4 | 0.310266 | 1.68973 | 0.00641    | 0.00642    | 62.75540 |
| pp_P13_4_2_4 | 0.284619 | 1.71538 | 0.00957    | 0.00956    | 60.46510 |
| pp_P20_6_5_6 | 0.147346 | 1.85265 | 0.01069    | 0.01069    | 46.58990 |
| pp_P14_3_4_4 | 0.261923 | 1.73808 | 0.01159    | 0.01162    | 0.89189  |
| pp_P16_5_3_5 | 0.242574 | 1.75743 | 0.01325    | 0.01330    | 57.76920 |
| pp_P17_5_4_5 | 0.160387 | 1.83961 | 0.01339    | 0.01339    | 48.26490 |
| pp_P19_7_4_5 | 0.312901 | 1.6871  | 0.01351    | 0.01352    | 68.16280 |
| pp_P19_6_4_6 | 0.200438 | 1.79956 | 0.01371    | 0.01372    | 55.37530 |
| pp_P17_6_3_5 | 0.28771  | 1.71229 | 0.01652    | 0.01653    | 64.15100 |
| pp_P14_4_3_4 | 0.198961 | 1.80104 | 0.01702    | 0.01701    | 50.56230 |
| pp_P8_2_1_2  | 0.469118 | 1.53088 | 0.01916    | 0.01916    | 58.09020 |
| pp_P19_5_5_6 | 0.191288 | 1.80871 | 0.01933    | 0.01934    | 28.20400 |
| pp_P11_3_2_3 | 0.248901 | 1.7511  | 0.02000    | 0.02002    | 53.85780 |
| pp_P19_4_6_6 | 0.178343 | 1.82166 | 0.02240    | 0.02244    | 0.58067  |
| pp_P19_7_3_6 | 0.244255 | 1.75574 | 0.02268    | 0.02268    | 64.76510 |
| pp_P12_4_2_3 | 0.427041 | 1.57296 | 0.02272    | 0.02274    | 65.85850 |
| pp_P17_8_3_3 | 0.317615 | 1.68238 | 0.02571    | 0.02575    | 90.00000 |
| pp_P19_6_3_7 | 0.293144 | 1.70686 | 0.02591    | 0.02591    | 60.27240 |
| pp_P11_2_3_3 | 0.328184 | 1.67182 | 0.02624    | 0.02625    | 0.44316  |
| pp_P16_4_4_5 | 0.225254 | 1.77475 | 0.02729    | 0.02732    | 26.68840 |
| pp_P20_8_4_5 | 0.355659 | 1.64434 | 0.02802    | 0.02802    | 74.42440 |
| pp_P18_4_5_6 | 0.221732 | 1.77827 | 0.02916    | 0.02921    | 0.72687  |
| pp_P16_6_3_4 | 0.39848  | 1.60152 | 0.02965    | 0.02967    | 71.03840 |
| pp_P20_6_4_7 | 0.174875 | 1.82512 | 0.02983    | 0.02983    | 53.41310 |
| pp_P18_5_4_6 | 0.1691   | 1.8309  | 0.03346    | 0.03348    | 44.24630 |
| pp_P20_4_6_7 | 0.179257 | 1.82074 | 0.03446    | 0.03450    | 0.55759  |
| pp_P16_3_5_5 | 0.214352 | 1.78565 | 0.03457    | 0.03458    | 0.40233  |
| pp_P17_5_3_6 | 0.215341 | 1.78466 | 0.03475    | 0.03477    | 56.24220 |
| pp_P14_5_2_4 | 0.334799 | 1.6652  | 0.03624    | 0.03625    | 65.51300 |
| pp_P16_6_2_5 | 0.285173 | 1.71483 | 0.03772    | 0.03773    | 65.82450 |
| pp_P20_5_5_7 | 0.19221  | 1.80779 | 0.04010    | 0.04008    | 20.58350 |
| pp_P13_6_2_2 | 0.423735 | 1.57627 | 0.04090    | 0.04092    | 90.00000 |
| pp_P13_3_3_4 | 0.27097  | 1.72903 | 0.04104    | 0.04106    | 24.63440 |
| pp_P15_3_4_5 | 0.266515 | 1.73349 | 0.04210    | 0.04214    | 0.55358  |

| name         | $c_l$    | $c_a$   | $\Delta_l$ | $\Delta_a$ | $\theta$ |
|--------------|----------|---------|------------|------------|----------|
| pp_P14_4_2_5 | 0.373008 | 1.62699 | 0.04241    | 0.04245    | 59.08600 |
| pp_P15_4_3_5 | 0.18284  | 1.81716 | 0.04269    | 0.04283    | 47.11020 |
| pp_P18_7_3_5 | 0.317334 | 1.68267 | 0.04573    | 0.04578    | 68.64240 |
| pp_P18_3_6_6 | 0.178723 | 1.82128 | 0.04662    | 0.04668    | 0.42139  |
| pp_P18_9_3_3 | 0.283807 | 1.71619 | 0.04713    | 0.04719    | 90.00000 |
| pp_P20_8_3_6 | 0.264057 | 1.73594 | 0.04889    | 0.04893    | 67.35140 |
| pp_P17_3_5_6 | 0.203691 | 1.79631 | 0.04895    | 0.04900    | 0.41290  |
| pp_P17_7_3_4 | 0.45593  | 1.54407 | 0.05285    | 0.05285    | 77.09250 |
| pp_P19_5_4_7 | 0.176829 | 1.82317 | 0.05362    | 0.05365    | 42.72280 |
| pp_P19_4_5_7 | 0.21986  | 1.78014 | 0.05365    | 0.05365    | 0.79567  |
| pp_P19_3_6_7 | 0.161405 | 1.83859 | 0.05501    | 0.05502    | 0.35334  |
| pp_P17_4_4_6 | 0.226377 | 1.77362 | 0.05540    | 0.05548    | 18.15260 |
| pp_P18_5_3_7 | 0.250378 | 1.74962 | 0.05639    | 0.05642    | 55.17570 |
| pp_P13_2_4_4 | 0.248419 | 1.75158 | 0.05575    | 0.05682    | 0.38556  |
| pp_P20_3_7_7 | 0.137384 | 1.86262 | 0.05833    | 0.05833    | 0.39890  |
| pp_P12_3_2_4 | 0.275826 | 1.72417 | 0.05945    | 0.05944    | 50.96150 |
| pp_P12_2_3_4 | 0.334818 | 1.66518 | 0.06423    | 0.06425    | 0.38424  |
| pp_P13_5_2_3 | 0.530889 | 1.46911 | 0.06540    | 0.06545    | 73.73710 |
| pp_P9_3_1_2  | 0.537084 | 1.46292 | 0.06584    | 0.06583    | 68.15800 |
| pp_P11_4_1_3 | 0.470457 | 1.52954 | 0.06657    | 0.06661    | 66.42390 |
| pp_P8_1_2_2  | 0.429654 | 1.57035 | 0.06653    | 0.06667    | 0.18589  |
| pp_P20_3_6_8 | 0.204172 | 1.79583 | 0.06718    | 0.06727    | 0.43322  |
| pp_P10_2_2_3 | 0.350837 | 1.64916 | 0.06787    | 0.06791    | 21.78910 |
| pp_P16_4_3_6 | 0.200007 | 1.79999 | 0.06866    | 0.06866    | 46.46890 |
| pp_P18_3_5_7 | 0.24435  | 1.75565 | 0.06868    | 0.06868    | 0.42585  |
| pp_P17_7_2_5 | 0.297884 | 1.70212 | 0.06912    | 0.06915    | 67.64410 |
| pp_P20_5_4_8 | 0.18141  | 1.81859 | 0.07115    | 0.07115    | 43.54940 |
| pp_P19_8_3_5 | 0.342397 | 1.6576  | 0.07116    | 0.07127    | 71.93310 |
| pp_P18_8_3_4 | 0.510874 | 1.48913 | 0.07230    | 0.07231    | 81.58250 |
| pp_P14_2_4_5 | 0.240316 | 1.75968 | 0.07263    | 0.07268    | 0.34282  |
| pp_P14_7_2_2 | 0.36809  | 1.63191 | 0.07293    | 0.07301    | 90.00000 |
| pp_P20_4_5_8 | 0.216832 | 1.78317 | 0.07466    | 0.07465    | 0.77276  |
| pp_P16_3_4_6 | 0.265956 | 1.73404 | 0.07491    | 0.07489    | 0.53657  |
| pp_P9_4_1_1  | 0.636505 | 1.36349 | 0.07718    | 0.07718    | 90.00000 |
| pp_P15_6_2_4 | 0.383565 | 1.61643 | 0.07824    | 0.07823    | 69.08350 |
| pp_P15_2_5_5 | 0.170963 | 1.82904 | 0.07897    | 0.07911    | 0.35585  |
| pp_P14_3_3_5 | 0.273535 | 1.72647 | 0.08055    | 0.08058    | 14.88350 |
| pp_P18_4_4_7 | 0.226562 | 1.77344 | 0.08081    | 0.08080    | 11.32180 |

| name          | $c_l$    | $c_a$   | $\Delta_l$ | $\Delta_a$ | $\theta$ |
|---------------|----------|---------|------------|------------|----------|
| pp_P9_2_1_3   | 0.549376 | 1.45062 | 0.08565    | 0.08566    | 55.78010 |
| pp_P19_9_3_4  | 0.562102 | 1.4379  | 0.08630    | 0.08633    | 84.91100 |
| pp_P16_2_5_6  | 0.157313 | 1.84269 | 0.08787    | 0.08795    | 0.31031  |
| pp_P19_3_5_8  | 0.240503 | 1.7595  | 0.09025    | 0.09053    | 0.54762  |
| pp_P20_9_3_5  | 0.360251 | 1.63975 | 0.09105    | 0.09109    | 74.30090 |
| pp_P18_8_2_5  | 0.315688 | 1.68431 | 0.09286    | 0.09295    | 69.09850 |
| pp_P17_4_3_7  | 0.233501 | 1.7665  | 0.09327    | 0.09343    | 45.66130 |
| pp_P20_10_3_4 | 0.608431 | 1.39157 | 0.09498    | 0.09498    | 87.43640 |
| pp_P17_2_6_6  | 0.124891 | 1.87511 | 0.09524    | 0.09526    | 0.28885  |
| pp_P17_2_5_7  | 0.230871 | 1.76913 | 0.09602    | 0.09605    | 0.33479  |
| pp_P15_2_4_6  | 0.303489 | 1.69651 | 0.09670    | 0.09662    | 0.42498  |
| pp_P13_3_2_5  | 0.314684 | 1.68532 | 0.09671    | 0.09675    | 50.11980 |
| pp_P14_6_2_3  | 0.613042 | 1.38696 | 0.09921    | 0.09928    | 79.04060 |

## 2.4 hp

### 2.4.1 Regular Cages

| name         | $\theta$ | name         | $\theta$ | name         | $\theta$ |
|--------------|----------|--------------|----------|--------------|----------|
| hp_P6_1_1_1  | 0.0      | hp_P12_5_2_2 | 90.0     | hp_P17_6_4_4 | 60.4745  |
| hp_P7_2_1_1  | 66.7135  | hp_P13_4_3_3 | 48.9376  | hp_P18_5_5_5 | 0.0      |
| hp_P8_3_1_1  | 90.0     | hp_P14_5_3_3 | 66.7135  | hp_P18_7_4_4 | 72.2173  |
| hp_P9_2_2_2  | 0.0      | hp_P15_4_4_4 | 0.0      | hp_P19_6_5_5 | 40.558   |
| hp_P10_3_2_2 | 55.7519  | hp_P15_6_3_3 | 79.5111  | hp_P19_8_4_4 | 81.7483  |
| hp_P11_4_2_2 | 75.5798  | hp_P16_5_4_4 | 44.1566  | hp_P20_7_5_5 | 55.7519  |
| hp_P12_3_3_3 | 0.0      | hp_P16_7_3_3 | 90.0     | hp_P20_9_4_4 | 90.0     |



### 2.4.2 Near-Miss Cages

| name         | $c_l$    | $c_a$   | $\Delta_l$ | $\Delta_a$ | $\theta$ |
|--------------|----------|---------|------------|------------|----------|
| hp_P19_7_4_5 | 0.239201 | 1.7608  | 0.00038    | 0.00038    | 63.92960 |
| hp_P14_5_2_4 | 0.295862 | 1.70414 | 0.00398    | 0.00398    | 65.72360 |
| hp_P12_4_2_3 | 0.334587 | 1.66541 | 0.00403    | 0.00403    | 63.02240 |
| hp_P19_7_3_6 | 0.22027  | 1.77973 | 0.00426    | 0.00426    | 65.27770 |
| hp_P16_6_2_5 | 0.295598 | 1.7044  | 0.00895    | 0.00896    | 67.24710 |
| hp_P17_6_3_5 | 0.256172 | 1.74383 | 0.00927    | 0.00930    | 62.77050 |
| hp_P16_6_3_4 | 0.339814 | 1.66019 | 0.01122    | 0.01122    | 68.09020 |
| hp_P15_5_3_4 | 0.222076 | 1.77792 | 0.01259    | 0.01259    | 57.61380 |
| hp_P18_6_4_5 | 0.156466 | 1.84353 | 0.01309    | 0.01311    | 52.69810 |
| hp_P20_7_4_6 | 0.20252  | 1.79748 | 0.01442    | 0.01446    | 59.17420 |
| hp_P20_8_4_5 | 0.309363 | 1.69064 | 0.01516    | 0.01516    | 71.61150 |
| hp_P18_7_3_5 | 0.283329 | 1.71667 | 0.01935    | 0.01938    | 67.71410 |
| hp_P20_6_5_6 | 0.185943 | 1.81406 | 0.01944    | 0.01947    | 30.13590 |
| hp_P20_5_6_6 | 0.183198 | 1.8168  | 0.02118    | 0.02119    | 0.71072  |
| hp_P20_8_3_6 | 0.239252 | 1.76075 | 0.02197    | 0.02197    | 67.68630 |
| hp_P17_5_4_5 | 0.209236 | 1.79076 | 0.02560    | 0.02561    | 33.28670 |
| hp_P17_8_3_3 | 0.317816 | 1.68218 | 0.02574    | 0.02576    | 90.00000 |
| hp_P9_3_1_2  | 0.49092  | 1.50908 | 0.02730    | 0.02730    | 67.31370 |
| hp_P19_5_5_6 | 0.208922 | 1.79108 | 0.02782    | 0.02782    | 0.96180  |
| hp_P17_4_5_5 | 0.212466 | 1.78753 | 0.02810    | 0.02811    | 0.53694  |
| hp_P20_7_3_7 | 0.234423 | 1.76558 | 0.02931    | 0.02025    | 64.96880 |
| hp_P15_5_2_5 | 0.380189 | 1.61981 | 0.03151    | 0.02584    | 65.01650 |
| hp_P18_6_3_6 | 0.214823 | 1.78518 | 0.03229    | 0.03231    | 61.58960 |
| hp_P11_4_1_3 | 0.487247 | 1.51275 | 0.03244    | 0.03243    | 67.85460 |
| hp_P19_6_4_6 | 0.155578 | 1.84442 | 0.03286    | 0.03289    | 48.25320 |
| hp_P14_4_3_4 | 0.241415 | 1.75858 | 0.03484    | 0.03484    | 37.71190 |
| hp_P16_5_3_5 | 0.188189 | 1.81181 | 0.03695    | 0.03695    | 54.01710 |
| hp_P17_7_3_4 | 0.392452 | 1.60755 | 0.03710    | 0.03710    | 74.74090 |
| hp_P16_4_4_5 | 0.246702 | 1.7533  | 0.03767    | 0.03770    | 0.81948  |
| hp_P10_3_1_3 | 0.660693 | 1.33931 | 0.03785    | 0.03465    | 65.15850 |
| hp_P14_3_4_4 | 0.265435 | 1.73456 | 0.03968    | 0.03970    | 0.48285  |
| hp_P13_4_2_4 | 0.307512 | 1.69249 | 0.04003    | 0.04004    | 59.87270 |
| hp_P13_5_2_3 | 0.449314 | 1.55069 | 0.04009    | 0.04012    | 71.58870 |
| hp_P13_6_2_2 | 0.424231 | 1.57577 | 0.04093    | 0.04094    | 90.00000 |
| hp_P17_7_2_5 | 0.291573 | 1.70843 | 0.04116    | 0.04119    | 68.64840 |
| hp_P19_4_6_6 | 0.178837 | 1.82116 | 0.04358    | 0.04358    | 0.58138  |
| hp_P18_4_5_6 | 0.19547  | 1.80453 | 0.04385    | 0.04395    | 0.47926  |
| hp_P15_6_2_4 | 0.336232 | 1.66377 | 0.04510    | 0.04512    | 68.95610 |

| name         | $c_l$    | $c_a$   | $\Delta_l$ | $\Delta_a$ | $\theta$ |
|--------------|----------|---------|------------|------------|----------|
| hp_P19_8_3_5 | 0.304702 | 1.6953  | 0.04601    | 0.04601    | 70.96590 |
| hp_P18_9_3_3 | 0.283992 | 1.71601 | 0.04712    | 0.04721    | 90.00000 |
| hp_P11_3_2_3 | 0.29846  | 1.70154 | 0.04836    | 0.04840    | 44.54770 |
| hp_P20_5_5_7 | 0.207992 | 1.79201 | 0.05228    | 0.05228    | 0.83421  |
| hp_P18_5_4_6 | 0.212604 | 1.7874  | 0.05265    | 0.05272    | 23.47810 |
| hp_P20_6_4_7 | 0.163432 | 1.83657 | 0.05297    | 0.05300    | 46.27120 |
| hp_P20_4_6_7 | 0.159457 | 1.84054 | 0.05345    | 0.05346    | 0.53665  |
| hp_P13_3_3_4 | 0.298839 | 1.70116 | 0.05367    | 0.05375    | 0.77048  |
| hp_P19_6_3_7 | 0.269153 | 1.73085 | 0.05648    | 0.04650    | 61.33500 |
| hp_P8_2_1_2  | 0.453372 | 1.54663 | 0.05764    | 0.05766    | 55.04780 |
| hp_P16_3_5_5 | 0.215938 | 1.78406 | 0.05897    | 0.05896    | 0.38663  |
| hp_P11_2_3_3 | 0.326964 | 1.67304 | 0.05965    | 0.05974    | 0.35511  |
| hp_P15_3_4_5 | 0.235426 | 1.76457 | 0.05992    | 0.05992    | 0.54587  |
| hp_P18_8_3_4 | 0.433525 | 1.56647 | 0.06083    | 0.06087    | 79.15080 |
| hp_P17_5_3_6 | 0.216118 | 1.78388 | 0.06191    | 0.06194    | 53.82450 |
| hp_P18_8_2_5 | 0.28432  | 1.71568 | 0.06511    | 0.06519    | 69.73020 |
| hp_P19_4_5_7 | 0.228282 | 1.77172 | 0.06628    | 0.06630    | 0.50204  |
| hp_P18_3_6_6 | 0.180582 | 1.81942 | 0.06758    | 0.06764    | 0.37230  |
| hp_P20_9_3_5 | 0.319889 | 1.68011 | 0.06765    | 0.06766    | 73.20480 |
| hp_P17_4_4_6 | 0.245723 | 1.75428 | 0.06984    | 0.06983    | 0.57867  |
| hp_P17_3_5_6 | 0.192836 | 1.80716 | 0.07067    | 0.07082    | 0.39457  |
| hp_P15_4_3_5 | 0.240351 | 1.75965 | 0.07086    | 0.07085    | 29.67580 |
| hp_P14_4_2_5 | 0.412878 | 1.58712 | 0.07284    | 0.07279    | 59.32560 |
| hp_P14_7_2_2 | 0.3677   | 1.6323  | 0.07297    | 0.07302    | 90.00000 |
| hp_P19_3_6_7 | 0.164506 | 1.83549 | 0.07481    | 0.07495    | 0.40385  |
| hp_P9_4_1_1  | 0.636136 | 1.36386 | 0.07714    | 0.07716    | 90.00000 |
| hp_P19_5_4_7 | 0.215575 | 1.78442 | 0.07776    | 0.07779    | 2.61436  |
| hp_P20_3_7_7 | 0.139984 | 1.86002 | 0.07807    | 0.07828    | 0.41864  |
| hp_P16_7_2_4 | 0.365144 | 1.63486 | 0.07843    | 0.07839    | 71.17450 |
| hp_P19_9_3_4 | 0.46579  | 1.53421 | 0.07913    | 0.07916    | 82.13400 |
| hp_P14_6_2_3 | 0.516505 | 1.4835  | 0.07995    | 0.07992    | 76.71630 |
| hp_P10_2_2_3 | 0.372414 | 1.62759 | 0.08193    | 0.08197    | 0.71792  |
| hp_P12_5_1_3 | 0.47276  | 1.52724 | 0.08248    | 0.08246    | 69.36680 |
| hp_P19_9_2_5 | 0.2921   | 1.7079  | 0.08250    | 0.08258    | 70.62740 |
| hp_P13_2_4_4 | 0.251189 | 1.74881 | 0.08430    | 0.08470    | 0.39269  |
| hp_P20_3_6_8 | 0.187939 | 1.81206 | 0.08509    | 0.08516    | 0.36729  |
| hp_P18_5_3_7 | 0.246452 | 1.75355 | 0.08507    | 0.08519    | 52.15290 |
| hp_P18_3_5_7 | 0.232328 | 1.76767 | 0.08631    | 0.08658    | 0.41119  |

| name          | $c_l$    | $c_a$   | $\Delta_l$ | $\Delta_a$ | $\theta$ |
|---------------|----------|---------|------------|------------|----------|
| hp_P12_2_3_4  | 0.296973 | 1.70303 | 0.08681    | 0.08679    | 0.37233  |
| hp_P20_4_5_8  | 0.22744  | 1.77256 | 0.08865    | 0.08867    | 0.73192  |
| hp_P16_3_4_6  | 0.277889 | 1.72211 | 0.08969    | 0.08980    | 0.55441  |
| hp_P20_10_3_4 | 0.490624 | 1.50938 | 0.09157    | 0.09160    | 84.22590 |
| hp_P12_3_2_4  | 0.27514  | 1.72486 | 0.09480    | 0.09488    | 40.21720 |
| hp_P20_10_2_5 | 0.278868 | 1.72113 | 0.09654    | 0.09655    | 71.28800 |
| hp_P18_4_4_7  | 0.24516  | 1.75484 | 0.09686    | 0.09687    | 0.67253  |
| hp_P14_2_4_5  | 0.226588 | 1.77341 | 0.09717    | 0.09723    | 0.25863  |
| hp_P14_3_3_5  | 0.301051 | 1.69895 | 0.09762    | 0.09765    | 0.70044  |
| hp_P20_5_4_8  | 0.213801 | 1.7862  | 0.09853    | 0.09883    | 1.44842  |

## 2.5 7p

### 2.5.1 Regular Cages

| name         | $\theta$ | name         | $\theta$ | name         | $\theta$ |
|--------------|----------|--------------|----------|--------------|----------|
| 7p_P7_2_1_1  | 61.7088  | 7p_P14_5_3_3 | 61.7088  | 7p_P18_7_4_4 | 68.5218  |
| 7p_P8_3_1_1  | 90.0     | 7p_P15_6_3_3 | 77.3937  | 7p_P19_6_5_5 | 24.3774  |
| 7p_P10_3_2_2 | 47.5689  | 7p_P16_5_4_4 | 30.6696  | 7p_P19_8_4_4 | 80.0921  |
| 7p_P11_4_2_2 | 72.6289  | 7p_P16_7_3_3 | 90.0     | 7p_P20_7_5_5 | 47.5689  |
| 7p_P12_5_2_2 | 90.0     | 7p_P17_6_4_4 | 53.7847  | 7p_P20_9_4_4 | 90.0     |
| 7p_P13_4_3_3 | 38.0456  |              |          |              |          |

### 2.5.2 Near-Miss Cages

| name         | $c_l$    | $c_a$   | $\Delta_l$ | $\Delta_a$ | $\theta$ |
|--------------|----------|---------|------------|------------|----------|
| 7p_P18_7_3_5 | 0.262159 | 1.73784 | 0.00195    | 0.00195    | 67.91600 |
| 7p_P16_6_3_4 | 0.28632  | 1.71368 | 0.00214    | 0.00214    | 66.04300 |
| 7p_P9_3_1_2  | 0.515839 | 1.48416 | 0.00282    | 0.00282    | 67.87500 |
| 7p_P20_8_3_6 | 0.222363 | 1.77764 | 0.00493    | 0.00493    | 68.91530 |
| 7p_P20_8_4_5 | 0.275024 | 1.72498 | 0.00532    | 0.00532    | 69.64490 |
| 7p_P19_7_4_5 | 0.182163 | 1.81784 | 0.00953    | 0.00953    | 59.95360 |
| 7p_P11_4_1_3 | 0.493943 | 1.50606 | 0.00979    | 0.00980    | 69.74630 |
| 7p_P16_6_2_5 | 0.269153 | 1.73085 | 0.01211    | 0.00765    | 69.30560 |
| 7p_P14_5_2_4 | 0.311082 | 1.68892 | 0.01664    | 0.01665    | 66.95010 |
| 7p_P18_5_5_5 | 0.218766 | 1.78123 | 0.01761    | 0.01761    | 0.86255  |
| 7p_P15_4_4_4 | 0.262694 | 1.73731 | 0.02021    | 0.02022    | 0.78136  |
| 7p_P12_4_2_3 | 0.266416 | 1.73358 | 0.02120    | 0.02121    | 61.11190 |
| 7p_P13_5_2_3 | 0.401529 | 1.59847 | 0.02125    | 0.02126    | 70.80560 |
| 7p_P19_7_3_6 | 0.219613 | 1.78039 | 0.02175    | 0.02176    | 66.83760 |
| 7p_P18_6_4_5 | 0.189262 | 1.81074 | 0.02216    | 0.02217    | 43.62980 |
| 7p_P17_7_2_5 | 0.29868  | 1.70132 | 0.02363    | 0.02369    | 70.21590 |
| 7p_P12_3_3_3 | 0.343961 | 1.65604 | 0.02404    | 0.02407    | 0.66078  |
| 7p_P17_7_3_4 | 0.354877 | 1.64512 | 0.02413    | 0.02413    | 73.55220 |
| 7p_P15_6_2_4 | 0.30774  | 1.69226 | 0.02435    | 0.02436    | 69.81850 |
| 7p_P20_6_5_6 | 0.202254 | 1.79775 | 0.02475    | 0.02475    | 1.77513  |
| 7p_P17_6_3_5 | 0.235325 | 1.76467 | 0.02541    | 0.02540    | 62.27780 |
| 7p_P15_5_3_4 | 0.209706 | 1.79029 | 0.02561    | 0.02565    | 51.63160 |
| 7p_P17_8_3_3 | 0.317418 | 1.68258 | 0.02575    | 0.02574    | 90.00000 |
| 7p_P20_7_4_6 | 0.164275 | 1.83572 | 0.02786    | 0.02788    | 55.78790 |
| 7p_P19_8_3_5 | 0.283022 | 1.71698 | 0.02900    | 0.02900    | 71.08420 |
| 7p_P9_2_2_2  | 0.467191 | 1.53281 | 0.02951    | 0.02952    | 0.63233  |
| 7p_P17_5_4_5 | 0.23817  | 1.76183 | 0.03214    | 0.03213    | 2.47090  |
| 7p_P19_5_5_6 | 0.203805 | 1.79619 | 0.03543    | 0.03545    | 0.70098  |
| 7p_P20_5_6_6 | 0.183505 | 1.8165  | 0.03675    | 0.03679    | 0.57838  |
| 7p_P6_1_1_1  | 0.780108 | 1.21989 | 0.04071    | 0.04071    | 0.56035  |
| 7p_P13_6_2_2 | 0.424079 | 1.57592 | 0.04093    | 0.04094    | 90.00000 |
| 7p_P14_4_3_4 | 0.28166  | 1.71834 | 0.04437    | 0.04438    | 15.74590 |
| 7p_P16_4_4_5 | 0.246483 | 1.75352 | 0.04582    | 0.04584    | 0.61219  |
| 7p_P17_4_5_5 | 0.213385 | 1.78661 | 0.04586    | 0.04586    | 0.57677  |
| 7p_P18_9_3_3 | 0.284079 | 1.71592 | 0.04719    | 0.04721    | 90.00000 |
| 7p_P19_6_4_6 | 0.191001 | 1.809   | 0.04716    | 0.04721    | 35.54090 |
| 7p_P18_8_2_5 | 0.283417 | 1.71658 | 0.04860    | 0.04863    | 70.97050 |
| 7p_P18_8_3_4 | 0.388622 | 1.61138 | 0.04978    | 0.04980    | 77.91130 |

| name          | $c_l$    | $c_a$   | $\Delta_l$ | $\Delta_a$ | $\theta$ |
|---------------|----------|---------|------------|------------|----------|
| 7p_P18_6_3_6  | 0.221716 | 1.77828 | 0.05107    | 0.05114    | 63.12950 |
| 7p_P20_9_3_5  | 0.296552 | 1.70345 | 0.05145    | 0.05150    | 73.16010 |
| 7p_P20_7_3_7  | 0.177828 | 1.82217 | 0.05574    | 0.03172    | 67.76380 |
| 7p_P16_5_3_5  | 0.204323 | 1.79568 | 0.05637    | 0.05646    | 46.76480 |
| 7p_P16_7_2_4  | 0.335701 | 1.6643  | 0.05801    | 0.05803    | 71.67740 |
| 7p_P19_4_6_6  | 0.178746 | 1.82125 | 0.05910    | 0.05912    | 0.44659  |
| 7p_P18_4_5_6  | 0.1892   | 1.8108  | 0.05996    | 0.05999    | 0.50144  |
| 7p_P15_5_2_5  | 0.288403 | 1.7116  | 0.06006    | 0.04031    | 67.84570 |
| 7p_P14_3_4_4  | 0.268082 | 1.73192 | 0.06056    | 0.06057    | 0.39305  |
| 7p_P13_4_2_4  | 0.323772 | 1.67623 | 0.06063    | 0.06065    | 59.84980 |
| 7p_P20_5_5_7  | 0.213112 | 1.78689 | 0.06133    | 0.06145    | 0.68066  |
| 7p_P12_5_1_3  | 0.482076 | 1.51792 | 0.06227    | 0.06230    | 70.73600 |
| 7p_P18_5_4_6  | 0.229558 | 1.77044 | 0.06264    | 0.06267    | 0.99030  |
| 7p_P13_3_3_4  | 0.302399 | 1.6976  | 0.06286    | 0.06293    | 0.48076  |
| 7p_P14_6_2_3  | 0.461246 | 1.53875 | 0.06321    | 0.06322    | 75.74590 |
| 7p_P11_3_2_3  | 0.353559 | 1.64644 | 0.06552    | 0.06558    | 29.26780 |
| 7p_P19_9_2_5  | 0.276325 | 1.72368 | 0.06642    | 0.06649    | 71.61800 |
| 7p_P20_4_6_7  | 0.16174  | 1.83826 | 0.06804    | 0.06806    | 0.55097  |
| 7p_P10_3_1_3  | 0.57544  | 1.42456 | 0.06874    | 0.05585    | 68.05650 |
| 7p_P19_9_3_4  | 0.411742 | 1.58826 | 0.07005    | 0.07005    | 80.63920 |
| 7p_P20_6_4_7  | 0.196809 | 1.80319 | 0.07107    | 0.07117    | 26.02240 |
| 7p_P14_7_2_2  | 0.367505 | 1.63249 | 0.07302    | 0.07301    | 90.00000 |
| 7p_P10_4_1_2  | 0.506945 | 1.49305 | 0.07501    | 0.07501    | 72.57440 |
| 7p_P16_3_5_5  | 0.216761 | 1.78324 | 0.07676    | 0.07688    | 0.37062  |
| 7p_P9_4_1_1   | 0.636251 | 1.36375 | 0.07712    | 0.07717    | 90.00000 |
| 7p_P19_4_5_7  | 0.226997 | 1.773   | 0.07705    | 0.07719    | 0.58717  |
| 7p_P15_3_4_5  | 0.237413 | 1.76259 | 0.07891    | 0.07893    | 0.42246  |
| 7p_P17_4_4_6  | 0.254742 | 1.74526 | 0.08034    | 0.08044    | 0.66868  |
| 7p_P17_8_2_4  | 0.348772 | 1.65123 | 0.08198    | 0.08204    | 72.96890 |
| 7p_P20_10_2_5 | 0.256386 | 1.74361 | 0.08276    | 0.08277    | 72.13690 |
| 7p_P18_3_6_6  | 0.180773 | 1.81923 | 0.08315    | 0.08319    | 0.40264  |
| 7p_P17_5_3_6  | 0.203126 | 1.79687 | 0.08344    | 0.08352    | 45.59690 |
| 7p_P15_4_3_5  | 0.270852 | 1.72915 | 0.08411    | 0.08419    | 0.76552  |
| 7p_P20_10_3_4 | 0.425772 | 1.57423 | 0.08423    | 0.08422    | 82.42100 |
| 7p_P11_2_3_3  | 0.329096 | 1.6709  | 0.08480    | 0.08481    | 0.24919  |
| 7p_P17_3_5_6  | 0.195959 | 1.80404 | 0.08726    | 0.08745    | 0.46520  |
| 7p_P19_6_3_7  | 0.204174 | 1.79583 | 0.08775    | 0.05553    | 64.98580 |
| 7p_P19_5_4_7  | 0.22753  | 1.77247 | 0.08888    | 0.08885    | 0.88222  |

| name         | $c_l$    | $c_a$   | $\Delta_l$ | $\Delta_a$ | $\theta$ |
|--------------|----------|---------|------------|------------|----------|
| 7p_P19_3_6_7 | 0.165882 | 1.83412 | 0.08928    | 0.08928    | 0.42170  |
| 7p_P8_2_1_2  | 0.494617 | 1.50538 | 0.09187    | 0.09197    | 48.92240 |
| 7p_P20_3_7_7 | 0.141235 | 1.85877 | 0.09260    | 0.09265    | 0.46860  |
| 7p_P15_7_2_3 | 0.493111 | 1.50689 | 0.09361    | 0.09363    | 78.57640 |
| 7p_P10_2_2_3 | 0.414663 | 1.58534 | 0.09525    | 0.09528    | 0.43806  |
| 7p_P18_9_2_4 | 0.348226 | 1.65177 | 0.09716    | 0.09731    | 73.86430 |
| 7p_P20_3_6_8 | 0.179704 | 1.8203  | 0.09737    | 0.09775    | 0.48432  |
| 7p_P13_6_1_3 | 0.401971 | 1.59803 | 0.09815    | 0.09820    | 71.48570 |
| 7p_P20_4_5_8 | 0.234047 | 1.76595 | 0.09912    | 0.09913    | 0.64357  |

## 2.6 8p

### 2.6.1 Regular Cages

| name         | $\theta$ | name         | $\theta$ | name         | $\theta$ |
|--------------|----------|--------------|----------|--------------|----------|
| 8p_P7_2_1_1  | 56.5624  | 8p_P13_4_3_3 | 23.7103  | 8p_P17_6_4_4 | 46.6145  |
| 8p_P8_3_1_1  | 90.0     | 8p_P14_5_3_3 | 56.5624  | 8p_P18_7_4_4 | 64.8056  |
| 8p_P10_3_2_2 | 38.3324  | 8p_P15_6_3_3 | 75.3008  | 8p_P19_8_4_4 | 78.4603  |
| 8p_P11_4_2_2 | 69.6893  | 8p_P16_5_4_4 | 0.0      | 8p_P20_7_5_5 | 38.3324  |
| 8p_P12_5_2_2 | 90.0     | 8p_P16_7_3_3 | 90.0     | 8p_P20_9_4_4 | 90.0     |

## 2.6.2 Near-Miss Cages

| name         | $c_l$    | $c_a$   | $\Delta_l$ | $\Delta_a$ | $\theta$ |
|--------------|----------|---------|------------|------------|----------|
| 8p_P20_8_4_5 | 0.239263 | 1.76074 | 0.00214    | 0.00214    | 68.08110 |
| 8p_P19_6_5_5 | 0.220069 | 1.77993 | 0.00498    | 0.00498    | 1.85796  |
| 8p_P20_8_3_6 | 0.219661 | 1.78034 | 0.00645    | 0.00645    | 70.56860 |
| 8p_P11_4_1_3 | 0.40738  | 1.59262 | 0.00686    | 0.00449    | 71.73990 |
| 8p_P13_5_2_3 | 0.370127 | 1.62987 | 0.00771    | 0.00771    | 70.79730 |
| 8p_P18_7_3_5 | 0.248446 | 1.75155 | 0.01011    | 0.01011    | 68.78310 |
| 8p_P15_6_2_4 | 0.303677 | 1.69632 | 0.01089    | 0.01089    | 71.11990 |
| 8p_P17_7_2_5 | 0.302689 | 1.69731 | 0.01167    | 0.01168    | 71.92740 |
| 8p_P16_6_3_4 | 0.242932 | 1.75707 | 0.01205    | 0.01207    | 64.35570 |
| 8p_P17_7_3_4 | 0.329798 | 1.6702  | 0.01412    | 0.01414    | 73.04860 |
| 8p_P9_3_1_2  | 0.541074 | 1.45893 | 0.01497    | 0.01499    | 68.97530 |
| 8p_P19_7_4_5 | 0.166352 | 1.83365 | 0.01664    | 0.01666    | 55.37350 |
| 8p_P19_8_3_5 | 0.268033 | 1.73197 | 0.01715    | 0.01717    | 71.75520 |
| 8p_P17_8_3_3 | 0.317719 | 1.68228 | 0.02575    | 0.02575    | 90.00000 |
| 8p_P18_6_4_5 | 0.215319 | 1.78468 | 0.02768    | 0.02767    | 31.86410 |
| 8p_P16_6_2_5 | 0.218776 | 1.78122 | 0.02974    | 0.01645    | 71.51700 |
| 8p_P20_6_5_6 | 0.197335 | 1.80266 | 0.02998    | 0.02998    | 1.02530  |
| 8p_P18_5_5_5 | 0.219959 | 1.78004 | 0.03112    | 0.03112    | 0.82978  |
| 8p_P14_5_2_4 | 0.320716 | 1.67928 | 0.03155    | 0.03156    | 68.74600 |
| 8p_P19_7_3_6 | 0.224984 | 1.77502 | 0.03422    | 0.03428    | 69.03340 |
| 8p_P15_5_3_4 | 0.244742 | 1.75526 | 0.03510    | 0.03510    | 43.36940 |
| 8p_P15_4_4_4 | 0.263807 | 1.73619 | 0.03571    | 0.03574    | 0.74454  |
| 8p_P12_4_2_3 | 0.279798 | 1.7202  | 0.03577    | 0.03575    | 58.51470 |
| 8p_P17_6_3_5 | 0.224386 | 1.77561 | 0.03624    | 0.03623    | 62.23560 |
| 8p_P18_8_2_5 | 0.289232 | 1.71077 | 0.03766    | 0.03767    | 72.35930 |
| 8p_P17_5_4_5 | 0.233187 | 1.76681 | 0.03782    | 0.03785    | 1.10503  |
| 8p_P20_7_4_6 | 0.164396 | 1.8356  | 0.03854    | 0.03858    | 50.00970 |
| 8p_P20_9_3_5 | 0.281451 | 1.71855 | 0.04011    | 0.04011    | 73.61720 |
| 8p_P18_8_3_4 | 0.360635 | 1.63936 | 0.04074    | 0.04073    | 77.37760 |
| 8p_P13_6_2_2 | 0.4239   | 1.5761  | 0.04088    | 0.04093    | 90.00000 |
| 8p_P12_3_3_3 | 0.348177 | 1.65182 | 0.04268    | 0.04273    | 0.65097  |
| 8p_P16_7_2_4 | 0.31668  | 1.68332 | 0.04425    | 0.04425    | 72.58340 |
| 8p_P18_9_3_3 | 0.284441 | 1.71556 | 0.04720    | 0.04724    | 90.00000 |
| 8p_P19_5_5_6 | 0.192139 | 1.80786 | 0.04725    | 0.04740    | 0.70304  |
| 8p_P12_5_1_3 | 0.486527 | 1.51347 | 0.04842    | 0.04843    | 72.20570 |
| 8p_P20_5_6_6 | 0.184315 | 1.81568 | 0.04867    | 0.04871    | 0.59845  |
| 8p_P14_4_3_4 | 0.282413 | 1.71759 | 0.05029    | 0.05029    | 1.21663  |
| 8p_P14_6_2_3 | 0.425762 | 1.57424 | 0.05029    | 0.05029    | 75.51240 |

| name          | $c_l$    | $c_a$   | $\Delta_l$ | $\Delta_a$ | $\theta$ |
|---------------|----------|---------|------------|------------|----------|
| 8p_P9_2_2_2   | 0.467037 | 1.53296 | 0.05225    | 0.05226    | 0.52937  |
| 8p_P19_6_4_6  | 0.217424 | 1.78258 | 0.05514    | 0.05515    | 3.29992  |
| 8p_P19_9_2_5  | 0.28071  | 1.71929 | 0.05664    | 0.05669    | 72.80070 |
| 8p_P16_4_4_5  | 0.238653 | 1.76135 | 0.05808    | 0.05820    | 0.52352  |
| 8p_P10_4_1_2  | 0.511016 | 1.48898 | 0.05881    | 0.05883    | 73.11110 |
| 8p_P17_4_5_5  | 0.214206 | 1.78579 | 0.05939    | 0.05944    | 0.48962  |
| 8p_P19_9_3_4  | 0.378526 | 1.62147 | 0.06185    | 0.06194    | 79.88360 |
| 8p_P18_6_3_6  | 0.22408  | 1.77592 | 0.06568    | 0.06567    | 66.26560 |
| 8p_P20_5_5_7  | 0.216272 | 1.78373 | 0.06846    | 0.06846    | 0.48155  |
| 8p_P17_8_2_4  | 0.328391 | 1.67161 | 0.06889    | 0.06890    | 73.63500 |
| 8p_P18_5_4_6  | 0.234881 | 1.76512 | 0.07017    | 0.07021    | 0.86309  |
| 8p_P16_5_3_5  | 0.23578  | 1.76422 | 0.07068    | 0.07069    | 31.51970 |
| 8p_P19_4_6_6  | 0.178967 | 1.82103 | 0.07088    | 0.07100    | 0.43838  |
| 8p_P18_4_5_6  | 0.191504 | 1.8085  | 0.07256    | 0.07265    | 0.48748  |
| 8p_P14_7_2_2  | 0.367751 | 1.63225 | 0.07303    | 0.07301    | 90.00000 |
| 8p_P20_10_2_5 | 0.243581 | 1.75642 | 0.07324    | 0.07327    | 73.16360 |
| 8p_P6_1_1_1   | 0.80167  | 1.19833 | 0.07328    | 0.07333    | 0.35593  |
| 8p_P11_3_2_3  | 0.387448 | 1.61255 | 0.07433    | 0.07436    | 1.19959  |
| 8p_P13_3_3_4  | 0.316623 | 1.68338 | 0.07523    | 0.07531    | 0.60737  |
| 8p_P13_4_2_4  | 0.335037 | 1.66496 | 0.07616    | 0.07625    | 60.60570 |
| 8p_P14_3_4_4  | 0.269458 | 1.73054 | 0.07653    | 0.07660    | 0.51286  |
| 8p_P20_10_3_4 | 0.387047 | 1.61295 | 0.07694    | 0.07693    | 81.46950 |
| 8p_P9_4_1_1   | 0.63643  | 1.36357 | 0.07718    | 0.07717    | 90.00000 |
| 8p_P20_4_6_7  | 0.162915 | 1.83708 | 0.07877    | 0.07906    | 0.51316  |
| 8p_P20_6_4_7  | 0.211207 | 1.78879 | 0.07973    | 0.07972    | 1.24479  |
| 8p_P15_7_2_3  | 0.453119 | 1.54688 | 0.08197    | 0.08203    | 78.06960 |
| 8p_P20_7_3_7  | 0.134896 | 1.8651  | 0.08276    | 0.03740    | 70.78440 |
| 8p_P18_9_2_4  | 0.327171 | 1.67283 | 0.08513    | 0.08524    | 74.39020 |
| 8p_P13_6_1_3  | 0.402127 | 1.59787 | 0.08653    | 0.08651    | 72.69030 |
| 8p_P15_5_2_5  | 0.234423 | 1.76558 | 0.08666    | 0.04818    | 70.88190 |
| 8p_P19_4_5_7  | 0.217018 | 1.78298 | 0.08812    | 0.08824    | 0.53732  |
| 8p_P17_4_4_6  | 0.260667 | 1.73933 | 0.08865    | 0.08872    | 0.59366  |
| 8p_P16_3_5_5  | 0.217341 | 1.78266 | 0.09032    | 0.09060    | 0.41244  |
| 8p_P15_4_3_5  | 0.280743 | 1.71926 | 0.09270    | 0.09270    | 0.89258  |
| 8p_P15_3_4_5  | 0.240612 | 1.75939 | 0.09362    | 0.09365    | 0.40684  |
| 8p_P18_3_6_6  | 0.181211 | 1.81879 | 0.09497    | 0.09504    | 0.45186  |
| 8p_P19_5_4_7  | 0.235732 | 1.76427 | 0.09763    | 0.09763    | 0.97213  |
| 8p_P10_3_1_3  | 0.467735 | 1.53226 | 0.09937    | 0.06669    | 71.10940 |



| name         | $c_l$    | $c_a$   | $\Delta_l$ | $\Delta_a$ | $\theta$ |
|--------------|----------|---------|------------|------------|----------|
| 8p_P17_3_5_6 | 0.197314 | 1.80269 | 0.09972    | 0.09988    | 0.53001  |

## 2.7 9p

### 2.7.1 Regular Cages

| name         | $\theta$ | name         | $\theta$ | name         | $\theta$ |
|--------------|----------|--------------|----------|--------------|----------|
| 9p_P7_2_1_1  | 51.164   | 9p_P14_5_3_3 | 51.164   | 9p_P18_7_4_4 | 61.0233  |
| 9p_P8_3_1_1  | 90.0     | 9p_P15_6_3_3 | 73.2156  | 9p_P19_8_4_4 | 76.8405  |
| 9p_P10_3_2_2 | 26.7843  | 9p_P16_7_3_3 | 90.0     | 9p_P20_7_5_5 | 26.7843  |
| 9p_P11_4_2_2 | 66.7323  | 9p_P17_6_4_4 | 38.5812  | 9p_P20_9_4_4 | 90.0     |
| 9p_P12_5_2_2 | 90.0     |              |          |              |          |

### 2.7.2 Near-Miss Cages

| name         | $c_l$    | $c_a$   | $\Delta_l$ | $\Delta_a$ | $\theta$ |
|--------------|----------|---------|------------|------------|----------|
| 9p_P15_6_2_4 | 0.312152 | 1.68785 | 0.00145    | 0.00145    | 72.55920 |
| 9p_P13_5_2_3 | 0.349165 | 1.65083 | 0.00216    | 0.00216    | 71.26210 |
| 9p_P17_7_2_5 | 0.30528  | 1.69472 | 0.00323    | 0.00323    | 73.58740 |
| 9p_P13_4_3_3 | 0.346112 | 1.65389 | 0.00441    | 0.00441    | 2.08588  |
| 9p_P17_7_3_4 | 0.311856 | 1.68814 | 0.00648    | 0.00648    | 72.97820 |
| 9p_P20_8_4_5 | 0.208398 | 1.7916  | 0.00804    | 0.00804    | 66.65730 |
| 9p_P19_8_3_5 | 0.257883 | 1.74212 | 0.00870    | 0.00871    | 72.71320 |
| 9p_P16_5_4_4 | 0.271613 | 1.72839 | 0.01205    | 0.01207    | 1.30554  |
| 9p_P20_8_3_6 | 0.225073 | 1.77493 | 0.01450    | 0.01451    | 72.34300 |
| 9p_P19_6_5_5 | 0.219326 | 1.78067 | 0.01541    | 0.01543    | 1.14039  |
| 9p_P18_7_3_5 | 0.239114 | 1.76089 | 0.01876    | 0.01878    | 70.10340 |
| 9p_P16_6_3_4 | 0.203548 | 1.79645 | 0.01923    | 0.01925    | 62.64980 |
| 9p_P11_4_1_3 | 0.354813 | 1.64519 | 0.02074    | 0.01244    | 73.58410 |
| 9p_P19_7_4_5 | 0.189623 | 1.81038 | 0.02213    | 0.02216    | 49.55310 |
| 9p_P17_8_3_3 | 0.317514 | 1.68249 | 0.02570    | 0.02574    | 90.00000 |
| 9p_P9_3_1_2  | 0.558664 | 1.44134 | 0.02853    | 0.02853    | 70.39840 |
| 9p_P18_8_2_5 | 0.292519 | 1.70748 | 0.02986    | 0.02986    | 73.73100 |
| 9p_P18_6_4_5 | 0.236739 | 1.76326 | 0.03078    | 0.03101    | 9.98368  |
| 9p_P20_9_3_5 | 0.27037  | 1.72963 | 0.03179    | 0.03187    | 74.30890 |
| 9p_P18_8_3_4 | 0.341219 | 1.65878 | 0.03354    | 0.03354    | 77.25870 |
| 9p_P16_7_2_4 | 0.308088 | 1.69191 | 0.03471    | 0.03478    | 73.63920 |
| 9p_P20_6_5_6 | 0.211054 | 1.78895 | 0.03491    | 0.03499    | 0.89919  |
| 9p_P12_5_1_3 | 0.489393 | 1.51061 | 0.03851    | 0.03851    | 73.63090 |
| 9p_P14_6_2_3 | 0.401998 | 1.598   | 0.04047    | 0.04050    | 75.69290 |
| 9p_P13_6_2_2 | 0.423875 | 1.57613 | 0.04094    | 0.04092    | 90.00000 |
| 9p_P15_5_3_4 | 0.270747 | 1.72925 | 0.04097    | 0.04096    | 32.70000 |
| 9p_P18_5_5_5 | 0.220813 | 1.77919 | 0.04178    | 0.04178    | 0.81233  |
| 9p_P14_5_2_4 | 0.327473 | 1.67253 | 0.04250    | 0.04249    | 70.85640 |
| 9p_P19_7_3_6 | 0.228323 | 1.77168 | 0.04298    | 0.04303    | 71.46530 |
| 9p_P17_5_4_5 | 0.245491 | 1.75451 | 0.04322    | 0.04326    | 0.88559  |
| 9p_P17_6_3_5 | 0.233232 | 1.76677 | 0.04496    | 0.04491    | 62.32070 |
| 9p_P16_6_2_5 | 0.177828 | 1.82217 | 0.04578    | 0.02142    | 73.51540 |
| 9p_P20_7_4_6 | 0.186893 | 1.81311 | 0.04700    | 0.04707    | 39.93640 |
| 9p_P18_9_3_3 | 0.2842   | 1.7158  | 0.04719    | 0.04720    | 90.00000 |
| 9p_P10_4_1_2 | 0.522977 | 1.47702 | 0.04737    | 0.04736    | 73.92810 |
| 9p_P15_4_4_4 | 0.265237 | 1.73476 | 0.04795    | 0.04803    | 0.66025  |
| 9p_P12_4_2_3 | 0.3114   | 1.6886  | 0.04892    | 0.04896    | 53.86530 |
| 9p_P19_9_2_5 | 0.28027  | 1.71973 | 0.05000    | 0.05002    | 73.97670 |

| name          | $c_l$    | $c_a$   | $\Delta_l$ | $\Delta_a$ | $\theta$ |
|---------------|----------|---------|------------|------------|----------|
| 9p_P19_9_3_4  | 0.35579  | 1.64421 | 0.05523    | 0.05525    | 79.57910 |
| 9p_P14_4_3_4  | 0.301113 | 1.69889 | 0.05647    | 0.05650    | 0.86592  |
| 9p_P19_5_5_6  | 0.19548  | 1.80452 | 0.05742    | 0.05749    | 0.73306  |
| 9p_P12_3_3_3  | 0.351152 | 1.64885 | 0.05751    | 0.05755    | 0.62729  |
| 9p_P20_5_6_6  | 0.184528 | 1.81547 | 0.05799    | 0.05807    | 0.48146  |
| 9p_P17_8_2_4  | 0.314491 | 1.68551 | 0.05950    | 0.05949    | 74.45010 |
| 9p_P19_6_4_6  | 0.220716 | 1.77928 | 0.06051    | 0.06056    | 1.44602  |
| 9p_P20_10_2_5 | 0.243275 | 1.75672 | 0.06703    | 0.06705    | 74.23330 |
| 9p_P16_4_4_5  | 0.237082 | 1.76292 | 0.06926    | 0.06933    | 0.50201  |
| 9p_P17_4_5_5  | 0.214149 | 1.78585 | 0.07004    | 0.07014    | 0.38724  |
| 9p_P9_2_2_2   | 0.466891 | 1.53311 | 0.07025    | 0.07025    | 0.58674  |
| 9p_P20_10_3_4 | 0.361609 | 1.63839 | 0.07063    | 0.07073    | 80.99700 |
| 9p_P15_7_2_3  | 0.426167 | 1.57383 | 0.07280    | 0.07285    | 77.98380 |
| 9p_P14_7_2_2  | 0.368121 | 1.63188 | 0.07293    | 0.07301    | 90.00000 |
| 9p_P20_5_5_7  | 0.216871 | 1.78313 | 0.07433    | 0.07434    | 0.60611  |
| 9p_P18_6_3_6  | 0.224938 | 1.77506 | 0.07581    | 0.07589    | 70.16220 |
| 9p_P18_5_4_6  | 0.2389   | 1.7611  | 0.07632    | 0.07632    | 0.86108  |
| 9p_P9_4_1_1   | 0.636466 | 1.36353 | 0.07714    | 0.07718    | 90.00000 |
| 9p_P13_6_1_3  | 0.401579 | 1.59842 | 0.07784    | 0.07781    | 73.88690 |
| 9p_P18_9_2_4  | 0.30664  | 1.69336 | 0.07798    | 0.07800    | 75.06100 |
| 9p_P16_5_3_5  | 0.257527 | 1.74247 | 0.07806    | 0.07810    | 2.00540  |
| 9p_P19_4_6_6  | 0.17868  | 1.82132 | 0.08022    | 0.08030    | 0.50426  |
| 9p_P11_3_2_3  | 0.397688 | 1.60231 | 0.08033    | 0.08033    | 0.66800  |
| 9p_P18_4_5_6  | 0.193469 | 1.80653 | 0.08252    | 0.08250    | 0.56020  |
| 9p_P20_6_4_7  | 0.217848 | 1.78215 | 0.08612    | 0.08616    | 1.22737  |
| 9p_P20_4_6_7  | 0.163445 | 1.83655 | 0.08750    | 0.08760    | 0.43653  |
| 9p_P13_3_3_4  | 0.310979 | 1.68902 | 0.08802    | 0.08802    | 0.58177  |
| 9p_P14_3_4_4  | 0.270292 | 1.72971 | 0.08925    | 0.08926    | 0.46224  |
| 9p_P13_4_2_4  | 0.354813 | 1.64519 | 0.08657    | 0.08984    | 61.77090 |
| 9p_P16_8_2_3  | 0.429617 | 1.57038 | 0.09363    | 0.09370    | 79.31540 |
| 9p_P17_4_4_6  | 0.265511 | 1.73449 | 0.09524    | 0.09534    | 0.61156  |
| 9p_P19_4_5_7  | 0.210773 | 1.78923 | 0.09676    | 0.09675    | 0.41205  |
| 9p_P11_5_1_2  | 0.498712 | 1.50129 | 0.09689    | 0.09699    | 75.68130 |
| 9p_P15_4_3_5  | 0.288523 | 1.71148 | 0.09958    | 0.09968    | 0.81109  |
| 9p_P6_1_1_1   | 0.817077 | 1.18292 | 0.09985    | 0.09990    | 0.52063  |

## 2.8 10p

### 2.8.1 Regular Cages

| name          | $\theta$ | name          | $\theta$ | name          | $\theta$ |
|---------------|----------|---------------|----------|---------------|----------|
| 10p_P7_2_1_1  | 45.3752  | 10p_P14_5_3_3 | 45.3752  | 10p_P18_7_4_4 | 57.1338  |
| 10p_P8_3_1_1  | 90.0     | 10p_P15_6_3_3 | 71.1266  | 10p_P19_8_4_4 | 75.225   |
| 10p_P10_3_2_2 | 0.0      | 10p_P16_7_3_3 | 90.0     | 10p_P20_7_5_5 | 0.0      |
| 10p_P11_4_2_2 | 63.7362  | 10p_P17_6_4_4 | 28.8749  | 10p_P20_9_4_4 | 90.0     |
| 10p_P12_5_2_2 | 90.0     |               |          |               |          |

## 2.8.2 Near-Miss Cages

| name          | $c_l$    | $c_a$   | $\Delta_l$ | $\Delta_a$ | $\theta$ |
|---------------|----------|---------|------------|------------|----------|
| 10p_P17_7_3_4 | 0.299669 | 1.70033 | 0.00054    | 0.00054    | 73.20280 |
| 10p_P19_8_3_5 | 0.250531 | 1.74947 | 0.00254    | 0.00254    | 73.80330 |
| 10p_P17_7_2_5 | 0.144544 | 1.85546 | 0.00448    | 0.00187    | 75.08530 |
| 10p_P15_6_2_4 | 0.31928  | 1.68072 | 0.00548    | 0.00548    | 73.98300 |
| 10p_P13_5_2_3 | 0.335369 | 1.66463 | 0.00952    | 0.00952    | 72.03780 |
| 10p_P20_8_4_5 | 0.179802 | 1.8202  | 0.01263    | 0.01262    | 65.17300 |
| 10p_P13_4_3_3 | 0.344983 | 1.65502 | 0.01568    | 0.01569    | 1.22433  |
| 10p_P20_8_3_6 | 0.22863  | 1.77137 | 0.02020    | 0.02023    | 74.04380 |
| 10p_P16_5_4_4 | 0.273206 | 1.72679 | 0.02178    | 0.02182    | 1.14446  |
| 10p_P19_6_5_5 | 0.219996 | 1.78    | 0.02389    | 0.02391    | 1.16874  |
| 10p_P18_8_2_5 | 0.295551 | 1.70445 | 0.02412    | 0.02413    | 75.00740 |
| 10p_P18_7_3_5 | 0.236571 | 1.76343 | 0.02525    | 0.02525    | 71.68420 |
| 10p_P17_8_3_3 | 0.317356 | 1.68264 | 0.02575    | 0.02574    | 90.00000 |
| 10p_P20_9_3_5 | 0.262752 | 1.73725 | 0.02573    | 0.02576    | 75.11000 |
| 10p_P19_7_4_5 | 0.207904 | 1.7921  | 0.02589    | 0.02590    | 42.68110 |
| 10p_P16_6_3_4 | 0.216083 | 1.78392 | 0.02613    | 0.02615    | 59.91970 |
| 10p_P18_8_3_4 | 0.32695  | 1.67305 | 0.02791    | 0.02790    | 77.38850 |
| 10p_P16_7_2_4 | 0.314986 | 1.68501 | 0.02823    | 0.02829    | 74.71970 |
| 10p_P12_5_1_3 | 0.490115 | 1.50989 | 0.03122    | 0.03124    | 74.94190 |
| 10p_P11_4_1_3 | 0.30903  | 1.69097 | 0.03234    | 0.01752    | 75.17260 |
| 10p_P14_6_2_3 | 0.385353 | 1.61465 | 0.03304    | 0.03306    | 76.10350 |
| 10p_P10_4_1_2 | 0.531885 | 1.46812 | 0.03877    | 0.03876    | 74.83490 |
| 10p_P9_3_1_2  | 0.570926 | 1.42907 | 0.03897    | 0.03897    | 72.01190 |
| 10p_P13_6_2_2 | 0.42423  | 1.57577 | 0.04093    | 0.04094    | 90.00000 |
| 10p_P20_6_5_6 | 0.20605  | 1.79395 | 0.04230    | 0.04232    | 0.76511  |
| 10p_P15_5_3_4 | 0.289948 | 1.71005 | 0.04464    | 0.04463    | 16.44110 |
| 10p_P19_9_2_5 | 0.280023 | 1.71998 | 0.04492    | 0.04498    | 75.09470 |
| 10p_P18_9_3_3 | 0.283952 | 1.71605 | 0.04718    | 0.04720    | 90.00000 |
| 10p_P17_5_4_5 | 0.260789 | 1.73921 | 0.04829    | 0.04830    | 0.87049  |
| 10p_P19_7_3_6 | 0.231326 | 1.76867 | 0.04893    | 0.04892    | 73.72150 |
| 10p_P19_9_3_4 | 0.340291 | 1.65971 | 0.04986    | 0.04987    | 79.52860 |
| 10p_P14_5_2_4 | 0.333082 | 1.66692 | 0.05027    | 0.05032    | 72.96730 |
| 10p_P18_5_5_5 | 0.221391 | 1.77861 | 0.05040    | 0.05040    | 0.71687  |
| 10p_P20_7_4_6 | 0.204967 | 1.79503 | 0.05218    | 0.05218    | 25.26440 |
| 10p_P17_6_3_5 | 0.240423 | 1.75958 | 0.05232    | 0.05234    | 63.09940 |
| 10p_P17_8_2_4 | 0.305177 | 1.69482 | 0.05259    | 0.05258    | 75.31000 |
| 10p_P15_4_4_4 | 0.266056 | 1.73394 | 0.05801    | 0.05800    | 0.72608  |
| 10p_P12_4_2_3 | 0.341277 | 1.65872 | 0.05887    | 0.05892    | 46.66450 |

| name           | $c_l$    | $c_a$   | $\Delta_l$ | $\Delta_a$ | $\theta$ |
|----------------|----------|---------|------------|------------|----------|
| 10p_P16_6_2_5  | 0.144544 | 1.85546 | 0.06026    | 0.02397    | 75.18470 |
| 10p_P14_4_3_4  | 0.314687 | 1.68531 | 0.06185    | 0.06182    | 0.95056  |
| 10p_P20_10_2_5 | 0.243865 | 1.75613 | 0.06219    | 0.06229    | 75.25320 |
| 10p_P19_6_4_6  | 0.222871 | 1.77713 | 0.06489    | 0.06499    | 1.23797  |
| 10p_P19_5_5_6  | 0.196835 | 1.80316 | 0.06552    | 0.06553    | 0.68958  |
| 10p_P15_7_2_3  | 0.406453 | 1.59355 | 0.06560    | 0.06559    | 78.13010 |
| 10p_P20_10_3_4 | 0.343732 | 1.65627 | 0.06551    | 0.06560    | 80.80900 |
| 10p_P20_5_6_6  | 0.184601 | 1.8154  | 0.06562    | 0.06560    | 0.61306  |
| 10p_P12_3_3_3  | 0.353319 | 1.64668 | 0.06958    | 0.06962    | 0.62761  |
| 10p_P13_6_1_3  | 0.401198 | 1.5988  | 0.07131    | 0.07129    | 75.00360 |
| 10p_P18_9_2_4  | 0.29085  | 1.70915 | 0.07234    | 0.07239    | 75.78840 |
| 10p_P14_7_2_2  | 0.368175 | 1.63183 | 0.07303    | 0.07303    | 90.00000 |
| 10p_P9_4_1_1   | 0.636218 | 1.36378 | 0.07717    | 0.07716    | 90.00000 |
| 10p_P16_4_4_5  | 0.236356 | 1.76364 | 0.07832    | 0.07831    | 0.63709  |
| 10p_P17_4_5_5  | 0.214763 | 1.78524 | 0.07870    | 0.07879    | 0.56280  |
| 10p_P18_5_4_6  | 0.241979 | 1.75802 | 0.08116    | 0.08127    | 0.75711  |
| 10p_P20_5_5_7  | 0.210653 | 1.78935 | 0.08115    | 0.08129    | 0.51109  |
| 10p_P16_5_3_5  | 0.267454 | 1.73255 | 0.08336    | 0.08338    | 1.42353  |
| 10p_P18_6_3_6  | 0.218776 | 1.78122 | 0.08255    | 0.08380    | 73.28150 |
| 10p_P9_2_2_2   | 0.4677   | 1.5323  | 0.08491    | 0.08492    | 0.44984  |
| 10p_P11_3_2_3  | 0.405416 | 1.59458 | 0.08531    | 0.08533    | 0.76218  |
| 10p_P16_8_2_3  | 0.408752 | 1.59125 | 0.08688    | 0.08688    | 79.30580 |
| 10p_P19_4_6_6  | 0.178621 | 1.82138 | 0.08778    | 0.08779    | 0.53947  |
| 10p_P11_5_1_2  | 0.508031 | 1.49197 | 0.08880    | 0.08880    | 76.22790 |
| 10p_P18_4_5_6  | 0.193944 | 1.80606 | 0.09042    | 0.09040    | 0.46164  |
| 10p_P20_6_4_7  | 0.221857 | 1.77814 | 0.09138    | 0.09136    | 1.10779  |
| 10p_P20_4_6_7  | 0.164169 | 1.83583 | 0.09420    | 0.09444    | 0.58031  |
| 10p_P13_3_3_4  | 0.314156 | 1.68584 | 0.09884    | 0.09888    | 0.64753  |
| 10p_P14_3_4_4  | 0.271591 | 1.72841 | 0.09946    | 0.09956    | 0.53755  |

## 2.9 ta

### 2.9.1 Regular Cages

| name           | $\theta$ | name           | $\theta$ | name           | $\theta$ |
|----------------|----------|----------------|----------|----------------|----------|
| ta_P8_1_1_1_1  | 54.7356  | ta_P16_3_3_3_3 | 54.7356  | ta_P20_4_4_4_4 | 54.7356  |
| ta_P12_2_2_2_2 | 54.7356  |                |          |                |          |

## 2.9.2 Near-Miss Cages

| name           | $c_l$    | $c_a$      | $\Delta_l$ | $\Delta_a$ | $\theta$ |
|----------------|----------|------------|------------|------------|----------|
| ta_P19_3_4_4_4 | 0.317607 | 1.68239    | 0.02502    | 0.02504    | 51.24780 |
| ta_P17_4_3_3_3 | 0.377957 | 1.62204    | 0.03355    | 0.03356    | 57.91640 |
| ta_P15_2_3_3_3 | 0.384175 | 1.61583    | 0.03772    | 0.03777    | 50.52540 |
| ta_P18_3_4_3_4 | 0.65839  | 1.34161    | 0.04641    | 0.04641    | 61.79920 |
| ta_P18_4_3_4_3 | 0.474155 | 1.52584    | 0.05103    | 0.05102    | 46.53220 |
| ta_P18_2_4_4_4 | 0.308343 | 1.69166    | 0.05265    | 0.05264    | 46.61760 |
| ta_P13_3_2_2_2 | 0.513037 | 1.48696    | 0.05361    | 0.05362    | 58.50720 |
| ta_P18_5_3_3_3 | 0.381194 | 1.61881    | 0.06297    | 0.06308    | 60.62270 |
| ta_P17_3_3_4_3 | 0.586766 | 1.41323    | 0.06384    | 0.06384    | 40.30410 |
| ta_P20_2_5_4_5 | 0.175422 | 1.82458    | 0.06398    | 0.06398    | 50.59380 |
| ta_P11_1_2_2_2 | 0.535058 | 1.46494    | 0.06443    | 0.06451    | 48.89150 |
| ta_P17_2_4_3_4 | 0.300778 | 1.69922    | 0.06549    | 0.06554    | 55.05920 |
| ta_P19_4_4_3_4 | 0.597907 | 1.40209    | 0.06669    | 0.06667    | 65.05710 |
| ta_P20_3_4_5_4 | 0.422562 | 1.57744    | 0.07010    | 0.07022    | 38.81420 |
| ta_P14_2_3_2_3 | 0.839511 | 1.16049    | 0.07270    | 0.07266    | 63.43200 |
| ta_P19_5_3_4_3 | 0.273284 | 1.72672    | 0.07615    | 0.07615    | 52.04420 |
| ta_P19_4_3_4_4 | 0.804127 | 1.19587    | 0.07649    | 0.07657    | 50.87470 |
| ta_P20_5_3_4_4 | 0.56315  | 1.43685    | 0.07810    | 0.07813    | 55.99540 |
| ta_P20_3_4_4_5 | 0.568477 | 1.43152    | 0.07871    | 0.07875    | 53.14640 |
| ta_P19_4_3_5_3 | 0.533023 | 1.46698    | 0.08126    | 0.08128    | 26.52620 |
| ta_P20_3_5_3_5 | 0.599185 | 1.40081    | 0.08120    | 0.08134    | 66.56780 |
| ta_P14_1_3_3_3 | 0.40738  | 1.59262    | 0.07861    | 0.08331    | 43.60970 |
| ta_P20_5_4_3_4 | 0.563852 | 1.43615    | 0.08486    | 0.08493    | 67.72090 |
| ta_P14_3_2_3_2 | 0.559223 | 1.44078    | 0.08599    | 0.08605    | 45.13040 |
| ta_P19_6_3_3_3 | 0.369423 | 1.63058    | 0.08700    | 0.08715    | 62.93580 |
| ta_P20_5_3_5_3 | 1.99877  | 0.00123027 | 0.00002    | 0.08898    | 9.98390  |
| ta_P17_3_3_3_4 | 0.75668  | 1.24332    | 0.09178    | 0.09179    | 58.49130 |
| ta_P19_3_4_3_5 | 0.583745 | 1.41625    | 0.09218    | 0.09218    | 63.61570 |
| ta_P17_1_4_4_4 | 0.40738  | 1.59262    | 0.06606    | 0.09376    | 37.56200 |
| ta_P19_2_5_3_5 | 0.476849 | 1.52315    | 0.09543    | 0.09542    | 61.63990 |
| ta_P19_2_4_5_4 | 0.375254 | 1.62475    | 0.09606    | 0.09618    | 33.55990 |
| ta_P14_4_2_2_2 | 0.493872 | 1.50613    | 0.09631    | 0.09634    | 61.43700 |
| ta_P19_2_4_4_5 | 0.40911  | 1.59089    | 0.09739    | 0.09739    | 47.91210 |
| ta_P18_4_3_3_4 | 0.560968 | 1.43903    | 0.09844    | 0.09852    | 62.44150 |
| ta_P20_1_5_5_5 | 0.436516 | 1.56348    | 0.05040    | 0.09853    | 30.99820 |
| ta_P13_2_2_3_2 | 0.750905 | 1.2491     | 0.09856    | 0.09863    | 35.75290 |
| ta_P16_2_3_4_3 | 0.506618 | 1.49338    | 0.09881    | 0.09885    | 35.64790 |
| ta_P9_2_1_1_1  | 0.885426 | 1.11457    | 0.09990    | 0.09993    | 59.93290 |

## 2.10 sa

### 2.10.1 Near-Miss Cages

| name           | $c_l$    | $c_a$    | $\Delta_l$ | $\Delta_a$ | $\theta$ |
|----------------|----------|----------|------------|------------|----------|
| sa_P14_4_2_2_2 | 0.667935 | 1.33207  | 0.00731    | 0.00731    | 60.03770 |
| sa_P18_5_3_3_3 | 0.472829 | 1.52717  | 0.01330    | 0.01330    | 57.37910 |
| sa_P19_6_3_3_3 | 0.52799  | 1.47201  | 0.01506    | 0.01506    | 61.29090 |
| sa_P9_2_1_1_1  | 0.970111 | 1.02989  | 0.02076    | 0.02078    | 57.53440 |
| sa_P20_7_3_3_3 | 0.535614 | 1.46439  | 0.03876    | 0.03876    | 64.08820 |
| sa_P13_3_2_2_2 | 0.561544 | 1.43846  | 0.03980    | 0.03981    | 54.66880 |
| sa_P17_4_3_3_3 | 0.408261 | 1.59174  | 0.04412    | 0.04419    | 52.46000 |
| sa_P15_5_2_2_2 | 0.699535 | 1.30047  | 0.04704    | 0.04702    | 63.79250 |
| sa_P20_6_3_4_3 | 0.590951 | 1.40905  | 0.04798    | 0.04794    | 46.17830 |
| sa_P20_5_4_3_4 | 0.289552 | 1.71045  | 0.05257    | 0.05273    | 60.88550 |
| sa_P10_3_1_1_1 | 1.10288  | 0.897121 | 0.06432    | 0.06430    | 63.79340 |
| sa_P19_5_3_4_3 | 0.53321  | 1.46679  | 0.06620    | 0.06624    | 39.13880 |
| sa_P20_4_4_4_4 | 0.297788 | 1.70221  | 0.06707    | 0.06705    | 44.68970 |
| sa_P19_4_4_3_4 | 0.190546 | 1.80945  | 0.06907    | 0.06908    | 56.36050 |
| sa_P16_4_3_2_3 | 0.718821 | 1.28118  | 0.06961    | 0.06965    | 65.64410 |
| sa_P19_5_3_3_4 | 0.76536  | 1.23464  | 0.07177    | 0.07174    | 60.51750 |
| sa_P16_3_3_3_3 | 0.384277 | 1.61572  | 0.07904    | 0.07901    | 45.40680 |
| sa_P18_6_2_3_3 | 0.612088 | 1.38791  | 0.08204    | 0.08212    | 60.17070 |
| sa_P15_4_2_3_2 | 0.726629 | 1.27337  | 0.08220    | 0.08220    | 37.84350 |
| sa_P20_6_3_3_4 | 0.527844 | 1.47216  | 0.08485    | 0.08486    | 64.02650 |
| sa_P16_6_2_2_2 | 0.55303  | 1.44697  | 0.08559    | 0.08560    | 65.42820 |
| sa_P16_5_2_3_2 | 0.556039 | 1.44396  | 0.08886    | 0.08890    | 50.65420 |
| sa_P15_3_3_2_3 | 0.251687 | 1.74831  | 0.08977    | 0.08986    | 57.76880 |
| sa_P18_3_4_3_4 | 0.192337 | 1.80766  | 0.08993    | 0.09009    | 51.04730 |
| sa_P17_5_3_2_3 | 0.813407 | 1.18659  | 0.09089    | 0.09093    | 69.45880 |
| sa_P19_3_4_4_4 | 0.290791 | 1.70921  | 0.09262    | 0.09268    | 35.74680 |
| sa_P18_4_3_3_4 | 0.647302 | 1.3527   | 0.09409    | 0.09405    | 54.22170 |
| sa_P18_4_3_4_3 | 0.435432 | 1.56457  | 0.09478    | 0.09478    | 32.11060 |
| sa_P12_2_2_2_2 | 0.510924 | 1.48908  | 0.09494    | 0.09503    | 46.38020 |
| sa_P19_7_2_3_3 | 0.47537  | 1.52463  | 0.09821    | 0.09824    | 63.14590 |
| sa_P17_5_2_3_3 | 0.661217 | 1.33878  | 0.09967    | 0.09968    | 55.20350 |



## 2.11 pa

### 2.11.1 Regular Cages

| name           | $\theta$ | name           | $\theta$ | name           | $\theta$ |
|----------------|----------|----------------|----------|----------------|----------|
| pa_P10_3_1_1_1 | 63.4349  | pa_P15_5_2_2_2 | 63.4349  | pa_P20_7_3_3_3 | 63.4349  |

### 2.11.2 Near-Miss Cages

| name           | $c_l$    | $c_a$   | $\Delta_l$ | $\Delta_a$ | $\theta$ |
|----------------|----------|---------|------------|------------|----------|
| pa_P19_6_3_3_3 | 0.562126 | 1.43787 | 0.02699    | 0.02701    | 59.03550 |
| pa_P16_6_2_2_2 | 0.622873 | 1.37713 | 0.04227    | 0.04228    | 65.99690 |
| pa_P14_4_2_2_2 | 0.686295 | 1.31371 | 0.04427    | 0.04426    | 57.74550 |
| pa_P18_5_3_3_3 | 0.445377 | 1.55462 | 0.05666    | 0.05661    | 53.15770 |
| pa_P18_6_3_2_3 | 0.850028 | 1.14997 | 0.06983    | 0.06988    | 70.33630 |
| pa_P20_6_3_3_4 | 0.662719 | 1.33728 | 0.07062    | 0.07062    | 61.57300 |
| pa_P17_5_3_2_3 | 0.461003 | 1.539   | 0.07325    | 0.07335    | 66.23870 |
| pa_P20_6_3_4_3 | 0.476735 | 1.52326 | 0.07354    | 0.07351    | 36.87480 |
| pa_P20_5_4_3_4 | 0.17954  | 1.82046 | 0.07475    | 0.07476    | 58.78650 |
| pa_P17_7_2_2_2 | 0.50382  | 1.49618 | 0.07708    | 0.07708    | 67.07570 |
| pa_P19_7_2_3_3 | 0.548639 | 1.45136 | 0.07865    | 0.07862    | 62.65430 |
| pa_P11_4_1_1_1 | 0.86866  | 1.13134 | 0.08178    | 0.08179    | 66.28320 |
| pa_P20_8_2_3_3 | 0.48184  | 1.51816 | 0.08227    | 0.08228    | 65.02480 |
| pa_P16_5_2_3_2 | 0.695368 | 1.30463 | 0.08442    | 0.08447    | 38.75130 |
| pa_P17_6_2_3_2 | 0.635545 | 1.36446 | 0.08517    | 0.08516    | 52.41630 |
| pa_P19_7_3_2_3 | 0.823641 | 1.17636 | 0.08520    | 0.08526    | 71.49360 |
| pa_P9_2_1_1_1  | 0.89245  | 1.10755 | 0.08612    | 0.08622    | 54.52560 |
| pa_P17_4_3_3_3 | 0.371684 | 1.62832 | 0.08739    | 0.08739    | 44.75480 |
| pa_P16_4_3_2_3 | 0.217585 | 1.78241 | 0.08973    | 0.08975    | 61.27670 |
| pa_P18_7_2_3_2 | 0.408087 | 1.59191 | 0.09241    | 0.09247    | 60.96870 |
| pa_P13_3_2_2_2 | 0.536188 | 1.46381 | 0.09316    | 0.09318    | 49.18200 |
| pa_P19_4_4_3_4 | 0.204179 | 1.79582 | 0.09435    | 0.09449    | 52.29200 |
| pa_P18_6_2_3_3 | 0.555248 | 1.44475 | 0.09528    | 0.09526    | 58.39130 |
| pa_P20_6_4_2_4 | 0.769359 | 1.23064 | 0.09727    | 0.09730    | 72.40890 |
| pa_P19_5_3_4_3 | 0.251189 | 1.74881 | 0.08653    | 0.09968    | 1.70354  |
| pa_P19_5_4_2_4 | 0.552279 | 1.44772 | 0.09975    | 0.09986    | 69.23420 |

## 2.12 ha

### 2.12.1 Near-Miss Cages

| name           | $c_l$    | $c_a$    | $\Delta_l$ | $\Delta_a$ | $\theta$ |
|----------------|----------|----------|------------|------------|----------|
| ha_P16_6_2_2_2 | 0.665182 | 1.33482  | 0.01074    | 0.01074    | 67.33670 |
| ha_P20_7_3_3_3 | 0.617539 | 1.38246  | 0.02800    | 0.02800    | 63.34680 |
| ha_P15_5_2_2_2 | 0.801368 | 1.19863  | 0.03371    | 0.03369    | 63.69330 |
| ha_P11_4_1_1_1 | 0.914431 | 1.08557  | 0.04185    | 0.04182    | 67.83640 |
| ha_P10_3_1_1_1 | 1.21337  | 0.786628 | 0.04358    | 0.04359    | 63.52630 |
| ha_P17_7_2_2_2 | 0.544062 | 1.45594  | 0.04975    | 0.04976    | 68.49640 |
| ha_P19_6_3_3_3 | 0.536877 | 1.46312  | 0.05407    | 0.05408    | 56.59960 |
| ha_P19_7_3_2_3 | 0.872575 | 1.12743  | 0.06121    | 0.06122    | 71.92530 |
| ha_P18_6_3_2_3 | 0.502631 | 1.49737  | 0.06941    | 0.06946    | 69.49030 |
| ha_P20_8_2_3_3 | 0.510599 | 1.4894   | 0.07278    | 0.07283    | 66.22500 |
| ha_P14_4_2_2_2 | 0.649727 | 1.35027  | 0.07664    | 0.07662    | 55.37960 |
| ha_P18_8_2_2_2 | 0.44861  | 1.55139  | 0.07860    | 0.07859    | 69.05890 |
| ha_P17_6_2_3_2 | 0.717584 | 1.28242  | 0.08101    | 0.08101    | 44.52900 |
| ha_P17_5_3_2_3 | 0.207083 | 1.79292  | 0.08158    | 0.08165    | 66.06830 |
| ha_P20_8_3_2_3 | 0.75971  | 1.24029  | 0.08223    | 0.08223    | 72.39230 |
| ha_P18_5_3_3_3 | 0.391738 | 1.60826  | 0.08227    | 0.08237    | 48.28900 |
| ha_P19_7_2_3_3 | 0.490576 | 1.50942  | 0.08643    | 0.08643    | 63.86650 |
| ha_P18_7_2_3_2 | 0.621844 | 1.37816  | 0.08727    | 0.08728    | 58.87290 |
| ha_P20_6_3_4_3 | 0.195521 | 1.80448  | 0.08874    | 0.08881    | 0.24359  |
| ha_P19_8_2_3_2 | 0.393245 | 1.60676  | 0.08993    | 0.08998    | 64.92170 |
| ha_P20_6_3_3_4 | 0.456019 | 1.54398  | 0.09064    | 0.09064    | 60.34320 |
| ha_P20_5_4_3_4 | 0.242823 | 1.75718  | 0.09179    | 0.09199    | 56.31540 |
| ha_P20_6_4_2_4 | 0.507299 | 1.4927   | 0.09711    | 0.09719    | 70.98600 |
| ha_P16_5_2_2_3 | 0.821061 | 1.17894  | 0.09860    | 0.09861    | 66.23780 |
| ha_P19_9_2_2_2 | 0.373509 | 1.62649  | 0.09877    | 0.09884    | 69.41520 |
| ha_P16_5_2_3_2 | 0.204174 | 1.79583  | 0.07382    | 0.09893    | 0.69603  |

## 2.13 7a

### 2.13.1 Near-Miss Cages

| name            | $c_l$    | $c_a$    | $\Delta_l$ | $\Delta_a$ | $\theta$ |
|-----------------|----------|----------|------------|------------|----------|
| 7a_P16_6_2_2_2  | 0.697832 | 1.30217  | 0.01286    | 0.01288    | 69.18220 |
| 7a_P11_4_1_1_1  | 0.948919 | 1.05108  | 0.01309    | 0.01309    | 69.73560 |
| 7a_P17_7_2_2_2  | 0.572768 | 1.42723  | 0.02993    | 0.02992    | 70.17880 |
| 7a_P20_7_3_3_3  | 0.636671 | 1.36333  | 0.04899    | 0.04899    | 63.64310 |
| 7a_P15_5_2_2_2  | 0.829143 | 1.17086  | 0.05936    | 0.05935    | 64.53450 |
| 7a_P18_8_2_2_2  | 0.475205 | 1.5248   | 0.06156    | 0.06156    | 70.61510 |
| 7a_P20_8_3_2_3  | 0.816226 | 1.18377  | 0.06418    | 0.06418    | 73.37970 |
| 7a_P19_7_3_2_3  | 0.659897 | 1.3401   | 0.06482    | 0.06484    | 72.42450 |
| 7a_P18_6_3_2_3  | 0.20613  | 1.79387  | 0.07077    | 0.07082    | 69.84890 |
| 7a_P19_6_3_3_3  | 0.490259 | 1.50974  | 0.07207    | 0.07208    | 53.99410 |
| 7a_P10_3_1_1_1  | 1.33931  | 0.660693 | 0.06247    | 0.07431    | 61.64450 |
| 7a_P20_8_2_3_3  | 0.468134 | 1.53187  | 0.07686    | 0.07693    | 68.27440 |
| 7a_P18_7_2_3_2  | 0.746373 | 1.25363  | 0.08168    | 0.08170    | 55.38600 |
| 7a_P12_5_1_1_1  | 0.725352 | 1.27465  | 0.08191    | 0.08191    | 70.28790 |
| 7a_P19_9_2_2_2  | 0.398304 | 1.6017   | 0.08382    | 0.08392    | 70.89610 |
| 7a_P19_8_2_3_2  | 0.533579 | 1.46642  | 0.08835    | 0.08836    | 65.71610 |
| 7a_P17_5_3_2_3  | 0.189159 | 1.81084  | 0.08999    | 0.08999    | 68.70990 |
| 7a_P19_7_2_3_3  | 0.472224 | 1.52778  | 0.09171    | 0.09172    | 66.42360 |
| 7a_P20_9_2_3_2  | 0.382657 | 1.61734  | 0.09214    | 0.09213    | 68.07010 |
| 7a_P14_4_2_2_2  | 0.596747 | 1.40325  | 0.09740    | 0.09742    | 52.99670 |
| 7a_P17_6_2_2_3  | 0.712141 | 1.28786  | 0.09843    | 0.09847    | 70.67020 |
| 7a_P17_6_2_3_2  | 1        | 1        | 0.04211    | 0.09879    | 17.65480 |
| 7a_P20_10_2_2_2 | 0.337573 | 1.66243  | 0.09932    | 0.09936    | 71.11030 |
| 7a_P20_6_3_3_4  | 0.389452 | 1.61055  | 0.09981    | 0.09974    | 60.97920 |

## 2.14 8a

### 2.14.1 Near-Miss Cages

| name            | $c_l$    | $c_a$    | $\Delta_l$ | $\Delta_a$ | $\theta$ |
|-----------------|----------|----------|------------|------------|----------|
| 8a_P11_4_1_1_1  | 0.975388 | 1.02461  | 0.00800    | 0.00800    | 71.75800 |
| 8a_P17_7_2_2_2  | 0.594113 | 1.40589  | 0.01526    | 0.01526    | 71.91740 |
| 8a_P16_6_2_2_2  | 0.723326 | 1.27667  | 0.03083    | 0.03085    | 71.34840 |
| 8a_P18_8_2_2_2  | 0.493957 | 1.50604  | 0.04902    | 0.04900    | 72.16440 |
| 8a_P20_8_3_2_3  | 0.766437 | 1.23356  | 0.06069    | 0.06075    | 74.36110 |
| 8a_P20_7_3_3_3  | 0.812831 | 1.18717  | 0.04309    | 0.06164    | 58.96150 |
| 8a_P12_5_1_1_1  | 0.748455 | 1.25155  | 0.06485    | 0.06492    | 71.91050 |
| 8a_P19_7_3_2_3  | 0.451291 | 1.54871  | 0.06709    | 0.06711    | 73.32470 |
| 8a_P19_9_2_2_2  | 0.416367 | 1.58363  | 0.07297    | 0.07298    | 72.34190 |
| 8a_P18_6_3_2_3  | 0.193381 | 1.80662  | 0.07582    | 0.07592    | 72.06360 |
| 8a_P15_5_2_2_2  | 1        | 1        | 0.05795    | 0.07653    | 60.87150 |
| 8a_P20_8_2_3_3  | 0.443048 | 1.55695  | 0.07898    | 0.07898    | 70.71900 |
| 8a_P18_7_2_3_2  | 0.763991 | 1.23601  | 0.08190    | 0.08185    | 51.68490 |
| 8a_P19_6_3_3_3  | 0.439547 | 1.56045  | 0.08412    | 0.08417    | 51.25260 |
| 8a_P20_9_2_3_2  | 0.399664 | 1.60034  | 0.08666    | 0.08665    | 69.93830 |
| 8a_P19_8_2_3_2  | 0.652228 | 1.34777  | 0.08691    | 0.08692    | 66.92210 |
| 8a_P20_10_2_2_2 | 0.354412 | 1.64559  | 0.08969    | 0.08971    | 72.49310 |
| 8a_P17_6_2_2_3  | 0.735585 | 1.26442  | 0.09302    | 0.09299    | 72.37450 |
| 8a_P10_3_1_1_1  | 1.29205  | 0.707946 | 0.08800    | 0.09425    | 62.29230 |
| 8a_P17_6_2_3_2  | 0.218776 | 1.78122  | 0.06787    | 0.09899    | 0.70338  |
| 8a_P17_5_3_2_3  | 0.245069 | 1.75493  | 0.09883    | 0.09900    | 71.80030 |
| 8a_P20_7_3_2_4  | 0.530389 | 1.46961  | 0.09945    | 0.09944    | 73.67110 |
| 8a_P18_7_2_2_3  | 0.62013  | 1.37987  | 0.09981    | 0.09980    | 73.06490 |

## 2.15 9a

### 2.15.1 Near-Miss Cages

| name            | $c_l$    | $c_a$   | $\Delta_l$ | $\Delta_a$ | $\theta$ |
|-----------------|----------|---------|------------|------------|----------|
| 9a_P17_7_2_2_2  | 0.609897 | 1.3901  | 0.00433    | 0.00433    | 73.58360 |
| 9a_P11_4_1_1_1  | 0.995816 | 1.00418 | 0.02344    | 0.02345    | 73.71430 |
| 9a_P18_8_2_2_2  | 0.509244 | 1.49076 | 0.03967    | 0.03967    | 73.62010 |
| 9a_P16_6_2_2_2  | 0.743387 | 1.25661 | 0.04425    | 0.04426    | 73.58860 |
| 9a_P12_5_1_1_1  | 0.76548  | 1.23452 | 0.05229    | 0.05231    | 73.42060 |
| 9a_P20_8_3_2_3  | 0.673178 | 1.32682 | 0.06250    | 0.06248    | 75.35630 |
| 9a_P19_9_2_2_2  | 0.429793 | 1.57021 | 0.06485    | 0.06485    | 73.69100 |
| 9a_P19_7_3_2_3  | 0.297111 | 1.70289 | 0.06739    | 0.06737    | 74.48280 |
| 9a_P20_7_3_3_3  | 0.758578 | 1.24142 | 0.04998    | 0.07386    | 56.56030 |
| 9a_P18_6_3_2_3  | 0.183059 | 1.81694 | 0.07892    | 0.07904    | 74.09450 |
| 9a_P20_8_2_3_3  | 0.449094 | 1.55091 | 0.08102    | 0.08106    | 73.05150 |
| 9a_P20_10_2_2_2 | 0.367439 | 1.63256 | 0.08250    | 0.08252    | 73.77820 |
| 9a_P19_8_2_3_2  | 0.754069 | 1.24593 | 0.08586    | 0.08587    | 68.69860 |
| 9a_P20_9_2_3_2  | 0.467018 | 1.53298 | 0.08630    | 0.08632    | 71.43090 |
| 9a_P18_7_2_3_2  | 0.7249   | 1.2751  | 0.08820    | 0.08815    | 49.35530 |
| 9a_P17_6_2_2_3  | 0.715404 | 1.2846  | 0.09305    | 0.09304    | 74.22720 |
| 9a_P18_7_2_2_3  | 0.637155 | 1.36284 | 0.09610    | 0.09614    | 74.49780 |
| 9a_P20_7_3_2_4  | 0.539764 | 1.46024 | 0.09646    | 0.09660    | 74.88960 |
| 9a_P15_5_2_2_2  | 1        | 1       | 0.05639    | 0.09697    | 56.12110 |
| 9a_P19_6_3_3_3  | 0.40738  | 1.59262 | 0.08584    | 0.09726    | 44.63810 |
| 9a_P19_8_2_2_3  | 0.564109 | 1.43589 | 0.09953    | 0.09951    | 74.60580 |

## 2.16 10a

### 2.16.1 Near-Miss Cages

| name             | $c_l$    | $c_a$    | $\Delta_l$ | $\Delta_a$ | $\theta$ |
|------------------|----------|----------|------------|------------|----------|
| 10a_P17_7_2_2_2  | 0.622682 | 1.37732  | 0.00386    | 0.00386    | 75.10190 |
| 10a_P18_8_2_2_2  | 0.520129 | 1.47987  | 0.03259    | 0.03259    | 74.93890 |
| 10a_P11_4_1_1_1  | 1.01085  | 0.989147 | 0.03467    | 0.03468    | 75.47110 |
| 10a_P12_5_1_1_1  | 0.779183 | 1.22082  | 0.04283    | 0.04282    | 74.78850 |
| 10a_P16_6_2_2_2  | 0.757653 | 1.24235  | 0.05385    | 0.05386    | 75.63630 |
| 10a_P19_9_2_2_2  | 0.44021  | 1.55979  | 0.05864    | 0.05864    | 74.90810 |
| 10a_P20_8_3_2_3  | 0.593796 | 1.4062   | 0.06351    | 0.06351    | 76.36090 |
| 10a_P19_7_3_2_3  | 0.20984  | 1.79016  | 0.06659    | 0.06663    | 75.67950 |
| 10a_P20_10_2_2_2 | 0.377342 | 1.62266  | 0.07700    | 0.07703    | 74.93730 |
| 10a_P18_6_3_2_3  | 0.175013 | 1.82499  | 0.08100    | 0.08104    | 75.82740 |
| 10a_P20_8_2_3_3  | 0.496983 | 1.50302  | 0.08478    | 0.08477    | 75.07510 |
| 10a_P19_8_2_3_2  | 0.842579 | 1.15742  | 0.08512    | 0.08516    | 71.29370 |
| 10a_P20_9_2_3_2  | 0.520447 | 1.47955  | 0.08590    | 0.08591    | 72.92140 |
| 10a_P20_7_3_3_3  | 0.707946 | 1.29205  | 0.05063    | 0.08622    | 52.32410 |
| 10a_P13_6_1_1_1  | 0.617002 | 1.383    | 0.09223    | 0.09225    | 74.66140 |
| 10a_P18_7_2_2_3  | 0.645351 | 1.35465  | 0.09392    | 0.09391    | 75.82900 |
| 10a_P17_6_2_2_3  | 0.692514 | 1.30749  | 0.09395    | 0.09403    | 76.01350 |
| 10a_P19_8_2_2_3  | 0.580184 | 1.41982  | 0.09644    | 0.09650    | 75.77700 |
| 10a_P18_7_2_3_2  | 0.354813 | 1.64519  | 0.05098    | 0.09803    | 1.77320  |
| 10a_P20_7_3_2_4  | 0.513172 | 1.48683  | 0.09813    | 0.09809    | 76.08830 |

## 2.17 Pte

### 2.17.1 Regular Cages

| name         | name          | name          |
|--------------|---------------|---------------|
| Pte_P6_1_1_1 | Pte_P12_3_3_3 | Pte_P18_5_5_5 |
| Pte_P9_2_2_2 | Pte_P15_4_4_4 |               |

### 2.17.2 Near-Miss Cages

| name          | $c_l$    | $c_a$   | $\Delta_l$ | $\Delta_a$ |
|---------------|----------|---------|------------|------------|
| Pte_P20_5_6_6 | 0.407704 | 1.5923  | 0.03912    | 0.03913    |
| Pte_P19_6_5_5 | 0.458729 | 1.54127 | 0.04326    | 0.04327    |
| Pte_P17_4_5_5 | 0.475066 | 1.52493 | 0.05163    | 0.05168    |
| Pte_P16_5_4_4 | 0.551012 | 1.44899 | 0.05799    | 0.05800    |
| Pte_P14_3_4_4 | 0.58735  | 1.41265 | 0.07319    | 0.07318    |
| Pte_P13_4_3_3 | 0.656933 | 1.34307 | 0.08040    | 0.08047    |
| Pte_P19_4_6_6 | 0.403785 | 1.59621 | 0.08170    | 0.08169    |
| Pte_P20_7_5_5 | 0.407097 | 1.5929  | 0.08297    | 0.08299    |
| Pte_P18_4_5_6 | 0.347843 | 1.65216 | 0.09394    | 0.09393    |

## 2.18 Poc2

### 2.18.1 Regular Cages

| name             | name             | name             |
|------------------|------------------|------------------|
| Poc2_P8_1_1_1_1  | Poc2_P16_3_3_3_3 | Poc2_P20_4_4_4_4 |
| Poc2_P12_2_2_2_2 |                  |                  |

### 2.18.2 Near-Miss Cages

| name             | $c_l$   | $c_a$      | $\Delta_l$ | $\Delta_a$ |
|------------------|---------|------------|------------|------------|
| Poc2_P18_3_4_3_4 | 1.99543 | 0.00457088 | 0.00000    | 0.01563    |
| Poc2_P14_2_3_2_3 | 1.99755 | 0.00245471 | 0.00000    | 0.02778    |
| Poc2_P20_3_5_3_5 | 1.99397 | 0.0060256  | 0.00000    | 0.02778    |
| Poc2_P16_2_4_2_4 | 1.92756 | 0.0724436  | 0.00002    | 0.04762    |
| Poc2_P10_1_2_1_2 | 1       | 1          | 0.00003    | 0.06250    |
| Poc2_P18_2_5_2_5 | 1.99149 | 0.00851138 | 0.00001    | 0.06250    |
| Poc2_P20_2_6_2_6 | 1.98712 | 0.0128825  | 0.00001    | 0.07408    |

## 2.19 Pdo

### 2.19.1 Regular Cages

| name         | name          | name          |
|--------------|---------------|---------------|
| Pdo_P6_1_1_1 | Pdo_P12_3_3_3 | Pdo_P18_5_5_5 |
| Pdo_P9_2_2_2 | Pdo_P15_4_4_4 |               |

## 2.20 Pic

### 2.20.1 Regular Cages

| name              | name              | name              |
|-------------------|-------------------|-------------------|
| Pic_P10_1_1_1_1_1 | Pic_P15_2_2_2_2_2 | Pic_P20_3_3_3_3_3 |

### 2.20.2 Near-Miss Cages

| name              | $c_l$    | $c_a$    | $\Delta_l$ | $\Delta_a$ |
|-------------------|----------|----------|------------|------------|
| Pic_P18_2_3_2_3_3 | 0.883585 | 1.11642  | 0.04420    | 0.04422    |
| Pic_P19_2_3_3_3_3 | 1.16944  | 0.830559 | 0.05709    | 0.05712    |
| Pic_P17_3_2_3_2_2 | 1.18418  | 0.815818 | 0.05981    | 0.05985    |
| Pic_P13_1_2_1_2_2 | 0.467735 | 1.53226  | 0.06545    | 0.06049    |
| Pic_P19_2_4_2_3_3 | 0.816133 | 1.18387  | 0.07433    | 0.07434    |
| Pic_P16_2_2_3_2_2 | 1.41132  | 0.58868  | 0.08022    | 0.08024    |
| Pic_P14_1_2_2_2_2 | 1.30707  | 0.692927 | 0.08900    | 0.08905    |
| Pic_P20_2_3_4_3_3 | 1.05869  | 0.941308 | 0.08948    | 0.08950    |
| Pic_P16_1_3_1_3_3 | 0.81521  | 1.18479  | 0.09204    | 0.09204    |
| Pic_P17_1_4_1_3_3 | 1        | 1        | 0.03965    | 0.09333    |
| Pic_P17_1_3_3_2_3 | 0.331131 | 1.66887  | 0.07692    | 0.09333    |
| Pic_P17_1_3_2_3_3 | 1.01219  | 0.987809 | 0.09437    | 0.09435    |
| Pic_P16_1_3_2_2_3 | 0.83511  | 1.16489  | 0.09504    | 0.09502    |

## 2.21 Att

### 2.21.1 Regular Cages

| name          | $\theta$ | name          | $\theta$ | name          | $\theta$ |
|---------------|----------|---------------|----------|---------------|----------|
| Att_P8_1_2_2  | 54.7356  | Att_P13_2_4_4 | 49.3306  | Att_P17_2_6_6 | 21.1796  |
| Att_P10_1_3_3 | 37.3774  | Att_P15_2_5_5 | 37.3774  | Att_P18_3_6_6 | 46.5233  |
| Att_P12_1_4_4 | 0.486698 | Att_P16_3_5_5 | 54.7356  | Att_P20_3_7_7 | 37.3774  |



### 2.21.2 Near-Miss Cages

| name           | $c_l$     | $c_a$    | $\Delta_l$ | $\Delta_a$ | $\theta$ |
|----------------|-----------|----------|------------|------------|----------|
| Att_P16_2_5_6  | 0.227508  | 1.77249  | 0.00055    | 0.00055    | 29.30650 |
| Att_P16_2_4_7  | 0.162803  | 1.8372   | 0.00085    | 0.00085    | 25.29370 |
| Att_P20_3_4_10 | 0.158763  | 1.84124  | 0.00457    | 0.00457    | 18.87830 |
| Att_P16_2_3_8  | 0.184321  | 1.81568  | 0.00469    | 0.00469    | 18.10900 |
| Att_P11_1_3_4  | 0.273889  | 1.72611  | 0.00509    | 0.00509    | 27.48030 |
| Att_P19_2_7_7  | 0.0839692 | 1.91603  | 0.00656    | 0.00658    | 0.00797  |
| Att_P15_2_3_7  | 0.202687  | 1.79731  | 0.00709    | 0.00709    | 21.06020 |
| Att_P20_3_5_9  | 0.136235  | 1.86376  | 0.00720    | 0.00720    | 24.88780 |
| Att_P19_4_6_6  | 0.180213  | 1.81979  | 0.00776    | 0.00776    | 54.73560 |
| Att_P17_2_5_7  | 0.183855  | 1.81614  | 0.00788    | 0.00788    | 26.57470 |
| Att_P20_3_6_8  | 0.177378  | 1.82262  | 0.00860    | 0.00863    | 30.28130 |
| Att_P18_2_6_7  | 0.206605  | 1.79339  | 0.00956    | 0.00956    | 20.29520 |
| Att_P17_2_4_8  | 0.153477  | 1.84652  | 0.01020    | 0.01021    | 22.90960 |
| Att_P15_2_4_6  | 0.207847  | 1.79215  | 0.01075    | 0.01076    | 28.33510 |
| Att_P11_1_2_5  | 0.230341  | 1.76966  | 0.01176    | 0.01176    | 20.84000 |
| Att_P19_3_6_7  | 0.223372  | 1.77663  | 0.01309    | 0.01310    | 37.79810 |
| Att_P19_3_4_9  | 0.16187   | 1.83813  | 0.01310    | 0.01313    | 21.22550 |
| Att_P10_1_2_4  | 0.269153  | 1.73085  | 0.01329    | 0.01330    | 24.86930 |
| Att_P18_2_5_8  | 0.152657  | 1.84734  | 0.01489    | 0.01492    | 25.23180 |
| Att_P20_2_7_8  | 0.202628  | 1.79737  | 0.01533    | 0.01534    | 8.64285  |
| Att_P19_3_5_8  | 0.16416   | 1.83584  | 0.01610    | 0.01613    | 27.43770 |
| Att_P19_2_6_8  | 0.163263  | 1.83674  | 0.01782    | 0.01784    | 23.34310 |
| Att_P18_2_4_9  | 0.138296  | 1.8617   | 0.01901    | 0.01901    | 20.53690 |
| Att_P14_2_3_6  | 0.206503  | 1.7935   | 0.02173    | 0.02175    | 24.12550 |
| Att_P19_2_5_9  | 0.120236  | 1.87976  | 0.02252    | 0.02252    | 23.72880 |
| Att_P12_1_3_5  | 0.181185  | 1.81881  | 0.02309    | 0.02314    | 25.16900 |
| Att_P18_3_4_8  | 0.164949  | 1.83505  | 0.02352    | 0.02353    | 23.65380 |
| Att_P14_2_4_5  | 0.287543  | 1.71246  | 0.02367    | 0.02368    | 36.35830 |
| Att_P13_1_4_5  | 0.269153  | 1.73085  | 0.02394    | 0.02399    | 18.21880 |
| Att_P20_2_6_9  | 0.132649  | 1.86735  | 0.02467    | 0.02470    | 24.12260 |
| Att_P18_3_5_7  | 0.202893  | 1.79711  | 0.02743    | 0.02742    | 32.09960 |
| Att_P14_1_5_5  | 1         | 1        | 0.00213    | 0.02778    | 0.00758  |
| Att_P11_2_3_3  | 1.06675   | 0.933254 | 0.00539    | 0.02780    | 54.73560 |
| Att_P14_3_4_4  | 0.262342  | 1.73766  | 0.02794    | 0.02796    | 54.73560 |
| Att_P20_4_6_7  | 0.277972  | 1.72203  | 0.02941    | 0.02940    | 51.40810 |
| Att_P20_2_5_10 | 0.107595  | 1.89241  | 0.02964    | 0.02964    | 21.98350 |
| Att_P17_4_5_5  | 0.217343  | 1.78266  | 0.03006    | 0.03008    | 54.73560 |
| Att_P20_5_6_6  | 0.185995  | 1.81401  | 0.03024    | 0.03028    | 54.73560 |

| name           | $c_l$     | $c_a$    | $\Delta_l$ | $\Delta_a$ | $\theta$ |
|----------------|-----------|----------|------------|------------|----------|
| Att_P17_3_5_6  | 0.289635  | 1.71036  | 0.03174    | 0.03174    | 45.22570 |
| Att_P17_3_3_8  | 0.200515  | 1.79948  | 0.03174    | 0.03175    | 18.87140 |
| Att_P13_2_2_6  | 0.268446  | 1.73155  | 0.03346    | 0.03352    | 17.86190 |
| Att_P18_3_3_9  | 0.196066  | 1.80393  | 0.03354    | 0.03356    | 17.60370 |
| Att_P12_1_2_6  | 0.205149  | 1.79485  | 0.03381    | 0.03385    | 17.43380 |
| Att_P17_3_4_7  | 0.179566  | 1.82043  | 0.03701    | 0.03700    | 26.67180 |
| Att_P15_1_5_6  | 0.201454  | 1.79855  | 0.03953    | 0.03953    | 6.58573  |
| Att_P20_4_4_9  | 0.161256  | 1.83874  | 0.04004    | 0.04004    | 21.63050 |
| Att_P13_1_3_6  | 0.158197  | 1.8418   | 0.04078    | 0.04081    | 22.93870 |
| Att_P13_2_3_5  | 0.233355  | 1.76665  | 0.04211    | 0.04212    | 28.40980 |
| Att_P14_1_4_6  | 0.160184  | 1.83982  | 0.04402    | 0.04404    | 22.87530 |
| Att_P20_4_5_8  | 0.17625   | 1.82375  | 0.04582    | 0.04582    | 29.28420 |
| Att_P9_1_2_3   | 0.344799  | 1.6552   | 0.04661    | 0.04660    | 32.56360 |
| Att_P16_3_3_7  | 0.205508  | 1.79449  | 0.04752    | 0.04750    | 21.55870 |
| Att_P16_1_6_6  | 1.12904   | 0.870964 | 0.00201    | 0.04762    | 0.00970  |
| Att_P18_4_5_6  | 0.316114  | 1.68389  | 0.05044    | 0.05045    | 54.73560 |
| Att_P14_2_2_7  | 0.321804  | 1.6782   | 0.05219    | 0.05219    | 17.26690 |
| Att_P19_4_4_8  | 0.164308  | 1.83569  | 0.05314    | 0.05316    | 24.05850 |
| Att_P9_1_1_4   | 0.335404  | 1.6646   | 0.05412    | 0.05409    | 17.54420 |
| Att_P17_1_6_7  | 0.114667  | 1.88533  | 0.05571    | 0.05571    | 2.51689  |
| Att_P15_3_4_5  | 0.420277  | 1.57972  | 0.05590    | 0.05593    | 54.23320 |
| Att_P16_1_5_7  | 0.15578   | 1.84422  | 0.05652    | 0.05662    | 18.07910 |
| Att_P16_3_4_6  | 0.235204  | 1.7648   | 0.05712    | 0.05714    | 32.69470 |
| Att_P19_4_3_9  | 0.154052  | 1.84595  | 0.05722    | 0.05728    | 17.95730 |
| Att_P12_2_2_5  | 0.275618  | 1.72438  | 0.05800    | 0.05805    | 21.43540 |
| Att_P18_5_5_5  | 0.225192  | 1.77481  | 0.05813    | 0.05819    | 54.73560 |
| Att_P15_1_4_7  | 0.124178  | 1.87582  | 0.05882    | 0.05892    | 23.00250 |
| Att_P14_1_3_7  | 0.174153  | 1.82585  | 0.05996    | 0.06002    | 18.01080 |
| Att_P18_1_7_7  | 1         | 1        | 0.00256    | 0.06250    | 0.00694  |
| Att_P18_4_3_8  | 0.197746  | 1.80225  | 0.06342    | 0.06346    | 19.26890 |
| Att_P19_4_5_7  | 0.231786  | 1.76821  | 0.06389    | 0.06394    | 38.42850 |
| Att_P18_1_6_8  | 0.136341  | 1.86366  | 0.06552    | 0.06569    | 11.22830 |
| Att_P15_4_4_4  | 0.272281  | 1.72772  | 0.06660    | 0.06667    | 54.73560 |
| Att_P15_3_3_6  | 0.208338  | 1.79166  | 0.06698    | 0.06704    | 24.73610 |
| Att_P19_1_7_8  | 0.0721148 | 1.92789  | 0.06855    | 0.06867    | 1.26071  |
| Att_P12_2_3_4  | 0.4186    | 1.5814   | 0.06915    | 0.06919    | 45.12240 |
| Att_P20_4_3_10 | 0.213589  | 1.78641  | 0.07017    | 0.07021    | 17.72080 |
| Att_P17_1_5_8  | 0.11704   | 1.88296  | 0.07062    | 0.07065    | 21.44730 |

| name           | $c_l$     | $c_a$   | $\Delta_l$ | $\Delta_a$ | $\theta$ |
|----------------|-----------|---------|------------|------------|----------|
| Att_P17_4_2_8  | 0.243843  | 1.75616 | 0.07260    | 0.07260    | 13.39850 |
| Att_P18_4_4_7  | 0.196911  | 1.80309 | 0.07266    | 0.07266    | 27.75780 |
| Att_P20_1_8_8  | 1         | 1       | 0.00227    | 0.07407    | 0.00634  |
| Att_P20_1_7_9  | 0.102003  | 1.898   | 0.07484    | 0.07497    | 6.06750  |
| Att_P19_5_5_6  | 0.272566  | 1.72743 | 0.07703    | 0.07700    | 54.73560 |
| Att_P12_3_3_3  | 0.344535  | 1.65547 | 0.07817    | 0.07822    | 54.73560 |
| Att_P19_1_6_9  | 0.108567  | 1.89143 | 0.07821    | 0.07826    | 18.25310 |
| Att_P16_1_4_8  | 0.179097  | 1.8209  | 0.07917    | 0.07921    | 18.06670 |
| Att_P8_1_1_3   | 0.413303  | 1.5867  | 0.08031    | 0.08036    | 21.23380 |
| Att_P20_5_4_8  | 0.172196  | 1.8278  | 0.08065    | 0.08100    | 24.23790 |
| Att_P20_5_3_9  | 0.166595  | 1.8334  | 0.08099    | 0.08112    | 18.10790 |
| Att_P18_1_5_9  | 0.0980357 | 1.90196 | 0.08137    | 0.08151    | 21.65940 |
| Att_P14_3_2_6  | 0.266635  | 1.73337 | 0.08229    | 0.08228    | 18.39810 |
| Att_P17_4_3_7  | 0.203062  | 1.79694 | 0.08212    | 0.08234    | 21.65480 |
| Att_P19_6_5_5  | 0.232373  | 1.76763 | 0.08443    | 0.08443    | 54.73560 |
| Att_P20_1_6_10 | 0.0895379 | 1.91046 | 0.08844    | 0.08844    | 20.43640 |
| Att_P10_1_1_5  | 0.516715  | 1.48329 | 0.08850    | 0.08849    | 16.53940 |
| Att_P15_3_2_7  | 0.230167  | 1.76983 | 0.09008    | 0.09008    | 17.87240 |
| Att_P11_2_2_4  | 0.272094  | 1.72791 | 0.09015    | 0.09015    | 26.14650 |
| Att_P16_4_4_5  | 0.340882  | 1.65912 | 0.09115    | 0.09119    | 54.73560 |
| Att_P19_5_3_8  | 0.198346  | 1.80165 | 0.09210    | 0.09211    | 19.29490 |
| Att_P20_5_5_7  | 0.335739  | 1.66426 | 0.09296    | 0.09294    | 54.73560 |
| Att_P9_2_2_2   | 0.467735  | 1.53226 | 0.09544    | 0.09552    | 54.73560 |

## 2.22 Atc

### 2.22.1 Regular Cages

| name          | $\theta$ | name          | $\theta$ | name | $\theta$ |
|---------------|----------|---------------|----------|------|----------|
| Atc_P12_1_4_4 | 0.784723 | Atc_P17_2_6_6 | 21.1796  |      |          |

### 2.22.2 Near-Miss Cages

| name           | $c_l$     | $c_a$    | $\Delta_l$ | $\Delta_a$ | $\theta$ |
|----------------|-----------|----------|------------|------------|----------|
| Atc_P17_2_4_8  | 0.134896  | 1.8651   | 0.00057    | 0.00060    | 14.89140 |
| Atc_P17_2_5_7  | 0.141173  | 1.85883  | 0.00130    | 0.00130    | 17.97200 |
| Atc_P20_3_7_7  | 0.127917  | 1.87208  | 0.00233    | 0.00234    | 35.26440 |
| Atc_P15_2_5_5  | 1.12904   | 0.870964 | 0.00031    | 0.00322    | 35.26440 |
| Atc_P18_2_6_7  | 0.178905  | 1.82109  | 0.00502    | 0.00504    | 17.16680 |
| Atc_P10_1_3_3  | 1.3834    | 0.616595 | 0.00046    | 0.00511    | 35.26440 |
| Atc_P18_2_5_8  | 0.109648  | 1.89035  | 0.00632    | 0.00634    | 16.91160 |
| Atc_P19_2_7_7  | 0.0835822 | 1.91642  | 0.00657    | 0.00658    | 0.01730  |
| Atc_P11_1_2_5  | 0.172541  | 1.82746  | 0.00698    | 0.00699    | 13.43270 |
| Atc_P18_2_4_9  | 0.111291  | 1.88871  | 0.00741    | 0.00741    | 13.37880 |
| Atc_P11_1_3_4  | 0.198825  | 1.80118  | 0.00828    | 0.00829    | 18.79070 |
| Atc_P16_2_3_8  | 0.14851   | 1.85149  | 0.00839    | 0.00840    | 11.69880 |
| Atc_P16_2_4_7  | 0.144355  | 1.85564  | 0.00957    | 0.00958    | 16.28810 |
| Atc_P16_2_5_6  | 0.208068  | 1.79193  | 0.00998    | 0.00998    | 20.55760 |
| Atc_P12_1_3_5  | 0.141168  | 1.85883  | 0.01002    | 0.01002    | 16.90240 |
| Atc_P19_2_6_8  | 0.120048  | 1.87995  | 0.01207    | 0.01212    | 17.41910 |
| Atc_P12_1_2_6  | 0.147733  | 1.85227  | 0.01293    | 0.01294    | 10.91530 |
| Atc_P19_2_5_9  | 0.096845  | 1.90315  | 0.01330    | 0.01331    | 15.81100 |
| Atc_P20_3_4_10 | 0.14283   | 1.85717  | 0.01361    | 0.01370    | 12.18350 |
| Atc_P20_3_5_9  | 0.140825  | 1.85917  | 0.01420    | 0.01433    | 15.78130 |
| Atc_P20_2_7_8  | 0.137279  | 1.86272  | 0.01483    | 0.01486    | 12.22280 |
| Atc_P18_3_6_6  | 0.169369  | 1.83063  | 0.01534    | 0.01539    | 35.26440 |
| Atc_P20_3_6_8  | 0.156498  | 1.8435   | 0.01541    | 0.01541    | 19.14280 |
| Atc_P20_2_6_9  | 0.0891251 | 1.91087  | 0.01808    | 0.01843    | 17.06250 |
| Atc_P15_2_3_7  | 0.172076  | 1.82792  | 0.01884    | 0.01906    | 13.48570 |
| Atc_P15_2_4_6  | 0.166854  | 1.83315  | 0.01948    | 0.01951    | 17.84270 |
| Atc_P20_2_5_10 | 0.087093  | 1.91291  | 0.01951    | 0.01959    | 14.55870 |
| Atc_P19_3_4_9  | 0.161202  | 1.8388   | 0.02024    | 0.02038    | 13.52410 |
| Atc_P19_3_5_8  | 0.151436  | 1.84856  | 0.02129    | 0.02130    | 16.96180 |
| Atc_P13_1_4_5  | 0.156352  | 1.84365  | 0.02218    | 0.02219    | 16.18530 |
| Atc_P13_1_3_6  | 0.121314  | 1.87869  | 0.02599    | 0.02600    | 15.23570 |
| Atc_P19_3_6_7  | 0.204702  | 1.7953   | 0.02676    | 0.02676    | 26.52270 |
| Atc_P14_1_5_5  | 1         | 1        | 0.00212    | 0.02778    | 0.01217  |
| Atc_P13_2_4_4  | 0.229096  | 1.7709   | 0.02807    | 0.02809    | 35.26440 |
| Atc_P18_3_4_8  | 0.172388  | 1.82761  | 0.02889    | 0.02894    | 14.73610 |
| Atc_P18_3_3_9  | 0.1594    | 1.8406   | 0.03019    | 0.03019    | 10.71300 |
| Atc_P10_1_2_4  | 0.205577  | 1.79442  | 0.03116    | 0.03116    | 15.76670 |
| Atc_P14_2_3_6  | 0.196882  | 1.80312  | 0.03126    | 0.03128    | 15.10680 |

| name           | $c_l$     | $c_a$   | $\Delta_l$ | $\Delta_a$ | $\theta$ |
|----------------|-----------|---------|------------|------------|----------|
| Atc_P18_3_5_7  | 0.17343   | 1.82657 | 0.03181    | 0.03190    | 18.95790 |
| Atc_P16_3_5_5  | 0.215628  | 1.78437 | 0.03461    | 0.03465    | 35.26440 |
| Atc_P14_2_4_5  | 0.246167  | 1.75383 | 0.03605    | 0.03604    | 22.75330 |
| Atc_P14_1_4_6  | 0.101838  | 1.89816 | 0.03659    | 0.03664    | 16.87750 |
| Atc_P17_3_3_8  | 0.194057  | 1.80594 | 0.03794    | 0.03794    | 12.00560 |
| Atc_P19_4_6_6  | 0.185337  | 1.81466 | 0.03823    | 0.03830    | 35.26440 |
| Atc_P14_1_3_7  | 0.105418  | 1.89458 | 0.03957    | 0.03965    | 13.30620 |
| Atc_P17_3_4_7  | 0.180593  | 1.81941 | 0.04012    | 0.04018    | 15.97020 |
| Atc_P20_4_3_10 | 0.172723  | 1.82728 | 0.04101    | 0.04107    | 9.53231  |
| Atc_P15_1_5_6  | 0.127243  | 1.87276 | 0.04154    | 0.04155    | 11.07720 |
| Atc_P20_4_4_9  | 0.163729  | 1.83627 | 0.04319    | 0.04319    | 13.31220 |
| Atc_P13_2_2_6  | 0.236619  | 1.76338 | 0.04457    | 0.04458    | 11.42060 |
| Atc_P20_4_5_8  | 0.151948  | 1.84805 | 0.04518    | 0.04519    | 16.71270 |
| Atc_P13_2_3_5  | 0.22582   | 1.77418 | 0.04601    | 0.04603    | 16.88080 |
| Atc_P14_2_2_7  | 0.202551  | 1.79745 | 0.04668    | 0.04674    | 10.42310 |
| Atc_P16_1_6_6  | 0.933254  | 1.06675 | 0.00294    | 0.04762    | 0.00814  |
| Atc_P15_1_4_7  | 0.0888115 | 1.91119 | 0.04840    | 0.04844    | 16.07710 |
| Atc_P16_3_3_7  | 0.206515  | 1.79349 | 0.05139    | 0.05149    | 13.28490 |
| Atc_P19_4_4_8  | 0.172     | 1.828   | 0.05459    | 0.05461    | 14.20690 |
| Atc_P19_4_3_9  | 0.171371  | 1.82863 | 0.05460    | 0.05462    | 10.93480 |
| Atc_P16_1_5_7  | 0.0831705 | 1.91683 | 0.05481    | 0.05481    | 15.88520 |
| Atc_P16_3_4_6  | 0.193984  | 1.80602 | 0.05554    | 0.05549    | 18.07490 |
| Atc_P20_4_6_7  | 0.226185  | 1.77382 | 0.05558    | 0.05558    | 35.26440 |
| Atc_P17_3_5_6  | 0.354813  | 1.64519 | 0.03715    | 0.05593    | 29.18410 |
| Atc_P17_1_6_7  | 0.100851  | 1.89915 | 0.05620    | 0.05626    | 5.41251  |
| Atc_P16_1_4_8  | 0.0784409 | 1.92156 | 0.05847    | 0.05857    | 14.71670 |
| Atc_P9_1_1_4   | 0.274134  | 1.72587 | 0.05877    | 0.05881    | 10.61780 |
| Atc_P9_1_2_3   | 0.261432  | 1.73857 | 0.05966    | 0.05967    | 19.14730 |
| Atc_P19_4_5_7  | 0.184023  | 1.81598 | 0.06078    | 0.06085    | 19.68090 |
| Atc_P20_5_6_6  | 0.191033  | 1.80897 | 0.06090    | 0.06095    | 35.26440 |
| Atc_P18_1_7_7  | 1         | 1       | 0.00248    | 0.06250    | 0.00915  |
| Atc_P12_2_2_5  | 0.272398  | 1.7276  | 0.06343    | 0.06346    | 13.23480 |
| Atc_P17_1_5_8  | 0.0676046 | 1.9324  | 0.06426    | 0.06440    | 16.17480 |
| Atc_P17_4_5_5  | 0.222384  | 1.77762 | 0.06448    | 0.06461    | 35.26440 |
| Atc_P18_4_3_8  | 0.193757  | 1.80624 | 0.06588    | 0.06587    | 11.80950 |
| Atc_P14_3_4_4  | 0.267363  | 1.73264 | 0.06752    | 0.06767    | 35.26440 |
| Atc_P18_1_6_8  | 0.0748241 | 1.92518 | 0.06765    | 0.06770    | 13.98130 |
| Atc_P11_2_3_3  | 0.334404  | 1.6656  | 0.06818    | 0.06819    | 35.26440 |

| name           | $c_l$     | $c_a$   | $\Delta_l$ | $\Delta_a$ | $\theta$ |
|----------------|-----------|---------|------------|------------|----------|
| Atc_P15_3_3_6  | 0.218749  | 1.78125 | 0.06847    | 0.06848    | 14.45880 |
| Atc_P18_4_4_7  | 0.180256  | 1.81974 | 0.06858    | 0.06865    | 15.34380 |
| Atc_P19_1_7_8  | 0.0690162 | 1.93098 | 0.06871    | 0.06880    | 2.70424  |
| Atc_P8_1_2_2   | 0.758578  | 1.24142 | 0.03754    | 0.07212    | 35.26440 |
| Atc_P18_1_5_9  | 0.0606775 | 1.93932 | 0.07240    | 0.07246    | 15.43400 |
| Atc_P20_1_8_8  | 1         | 1       | 0.00232    | 0.07407    | 0.02488  |
| Atc_P19_1_6_9  | 0.0583288 | 1.94167 | 0.07602    | 0.07616    | 15.67460 |
| Atc_P20_5_3_9  | 0.178796  | 1.8212  | 0.07748    | 0.07760    | 10.74080 |
| Atc_P20_5_4_8  | 0.173903  | 1.8261  | 0.07832    | 0.07832    | 13.36060 |
| Atc_P12_2_3_4  | 0.292716  | 1.70728 | 0.07881    | 0.07881    | 23.29950 |
| Atc_P15_3_2_7  | 0.175703  | 1.8243  | 0.08184    | 0.08207    | 10.87810 |
| Atc_P17_4_3_7  | 0.207804  | 1.7922  | 0.08263    | 0.08265    | 12.59090 |
| Atc_P20_1_6_10 | 0.0492902 | 1.95071 | 0.08289    | 0.08294    | 15.60040 |
| Atc_P10_1_1_5  | 0.354813  | 1.64519 | 0.08349    | 0.08356    | 9.86523  |
| Atc_P18_4_5_6  | 0.258413  | 1.74159 | 0.08559    | 0.08560    | 35.26440 |
| Atc_P14_3_2_6  | 0.259729  | 1.74027 | 0.08622    | 0.08626    | 11.33240 |
| Atc_P11_2_1_5  | 0.344049  | 1.65595 | 0.08640    | 0.08646    | 8.24085  |
| Atc_P20_5_5_7  | 0.194939  | 1.80506 | 0.08860    | 0.08857    | 20.31860 |
| Atc_P19_5_2_9  | 0.21594   | 1.78406 | 0.09009    | 0.09009    | 7.90897  |
| Atc_P17_4_4_6  | 0.209156  | 1.79084 | 0.09016    | 0.09028    | 18.09310 |
| Atc_P14_3_3_5  | 0.232374  | 1.76763 | 0.09096    | 0.09096    | 16.34720 |
| Atc_P11_2_2_4  | 0.290773  | 1.70923 | 0.09136    | 0.09136    | 14.95940 |
| Atc_P19_5_3_8  | 0.203234  | 1.79677 | 0.09263    | 0.09267    | 11.13330 |
| Atc_P18_5_5_5  | 0.230315  | 1.76969 | 0.09277    | 0.09281    | 35.26440 |
| Atc_P19_5_4_7  | 0.183925  | 1.81607 | 0.09494    | 0.09504    | 14.46960 |

## 2.23 Ato

### 2.23.1 Regular Cages

| name          | $\theta$ | name          | $\theta$ | name          | $\theta$ |
|---------------|----------|---------------|----------|---------------|----------|
| Ato_P8_1_2_2  | 0.286629 | Ato_P14_3_4_4 | 37.1105  | Ato_P19_4_6_6 | 22.9912  |
| Ato_P11_2_3_3 | 29.945   | Ato_P17_4_5_5 | 40.9602  | Ato_P20_5_6_6 | 43.4027  |

### 2.23.2 Near-Miss Cages

| name           | $c_l$     | $c_a$   | $\Delta_l$ | $\Delta_a$ | $\theta$ |
|----------------|-----------|---------|------------|------------|----------|
| Ato_P16_3_5_5  | 0.210977  | 1.78902 | 0.00003    | 0.00003    | 1.38073  |
| Ato_P15_3_4_5  | 0.240327  | 1.75967 | 0.00110    | 0.00110    | 25.85740 |
| Ato_P15_3_3_6  | 0.218536  | 1.78146 | 0.00271    | 0.00271    | 22.32000 |
| Ato_P11_2_2_4  | 0.296001  | 1.704   | 0.00372    | 0.00372    | 23.03690 |
| Ato_P19_4_5_7  | 0.176862  | 1.82314 | 0.00384    | 0.00384    | 25.05420 |
| Ato_P18_4_3_8  | 0.19528   | 1.80472 | 0.00443    | 0.00443    | 18.37720 |
| Ato_P19_4_4_8  | 0.166838  | 1.83316 | 0.00496    | 0.00496    | 21.87780 |
| Ato_P11_2_1_5  | 0.0831764 | 1.91682 | 0.00621    | 0.00253    | 12.75450 |
| Ato_P15_3_2_7  | 0.252133  | 1.74787 | 0.00628    | 0.00629    | 14.88410 |
| Ato_P18_4_4_7  | 0.172912  | 1.82709 | 0.00677    | 0.00677    | 23.63880 |
| Ato_P19_4_3_9  | 0.185515  | 1.81448 | 0.00715    | 0.00715    | 16.06510 |
| Ato_P18_4_5_6  | 0.222181  | 1.77782 | 0.00745    | 0.00745    | 28.49740 |
| Ato_P20_4_6_7  | 0.179255  | 1.82074 | 0.00972    | 0.00974    | 19.97590 |
| Ato_P14_3_2_6  | 0.268221  | 1.73178 | 0.01238    | 0.01240    | 17.84050 |
| Ato_P20_4_5_8  | 0.146175  | 1.85382 | 0.01304    | 0.01309    | 23.84520 |
| Ato_P20_4_4_9  | 0.159438  | 1.84056 | 0.01423    | 0.01426    | 20.01330 |
| Ato_P17_4_2_8  | 0.233737  | 1.76626 | 0.01451    | 0.01452    | 13.38220 |
| Ato_P16_3_4_6  | 0.186198  | 1.8138  | 0.01540    | 0.01541    | 24.17510 |
| Ato_P13_2_4_4  | 0.238707  | 1.76129 | 0.01550    | 0.01564    | 0.00770  |
| Ato_P20_4_3_10 | 0.17695   | 1.82305 | 0.01619    | 0.01619    | 13.65720 |
| Ato_P14_3_3_5  | 0.22586   | 1.77414 | 0.01620    | 0.01622    | 24.63330 |
| Ato_P18_3_6_6  | 0.173943  | 1.82606 | 0.01637    | 0.01646    | 0.00522  |
| Ato_P16_3_3_7  | 0.207328  | 1.79267 | 0.01708    | 0.01713    | 20.04350 |
| Ato_P12_2_3_4  | 0.252768  | 1.74723 | 0.01801    | 0.01802    | 23.48050 |
| Ato_P17_4_3_7  | 0.205756  | 1.79424 | 0.01915    | 0.01916    | 20.50620 |
| Ato_P20_5_3_9  | 0.188808  | 1.81119 | 0.01932    | 0.01935    | 16.95070 |
| Ato_P17_3_5_6  | 0.199114  | 1.80089 | 0.02009    | 0.02010    | 15.46340 |
| Ato_P18_5_5_5  | 0.219965  | 1.78004 | 0.02103    | 0.02103    | 45.00000 |
| Ato_P12_2_2_5  | 0.278516  | 1.72148 | 0.02121    | 0.02120    | 20.09610 |
| Ato_P17_4_4_6  | 0.205019  | 1.79498 | 0.02221    | 0.02223    | 26.01720 |
| Ato_P20_5_4_8  | 0.170647  | 1.82935 | 0.02228    | 0.02226    | 22.13690 |
| Ato_P15_4_4_4  | 0.267214  | 1.73279 | 0.02413    | 0.02414    | 45.00000 |
| Ato_P20_5_5_7  | 0.189602  | 1.8104  | 0.02492    | 0.02492    | 27.42320 |
| Ato_P7_1_1_2   | 0.503867  | 1.49613 | 0.02633    | 0.02634    | 24.58400 |
| Ato_P17_3_4_7  | 0.174187  | 1.82581 | 0.02642    | 0.02643    | 23.03140 |
| Ato_P17_3_3_8  | 0.196544  | 1.80346 | 0.02794    | 0.02795    | 17.51430 |
| Ato_P19_3_6_7  | 0.195702  | 1.8043  | 0.02841    | 0.02842    | 5.16546  |
| Ato_P12_3_3_3  | 0.340434  | 1.65957 | 0.02842    | 0.02845    | 45.00000 |

| name           | $c_l$     | $c_a$   | $\Delta_l$ | $\Delta_a$ | $\theta$ |
|----------------|-----------|---------|------------|------------|----------|
| Ato_P20_3_7_7  | 0.133194  | 1.86681 | 0.02888    | 0.02889    | 0.00749  |
| Ato_P8_1_1_3   | 0.475438  | 1.52456 | 0.02912    | 0.02911    | 20.16150 |
| Ato_P10_2_1_4  | 0.397519  | 1.60248 | 0.03095    | 0.03096    | 16.75110 |
| Ato_P16_4_2_7  | 0.246777  | 1.75322 | 0.03276    | 0.03279    | 16.00740 |
| Ato_P18_3_5_7  | 0.163827  | 1.83617 | 0.03310    | 0.03321    | 21.91680 |
| Ato_P19_5_3_8  | 0.198515  | 1.80149 | 0.03382    | 0.03385    | 18.87510 |
| Ato_P18_3_4_8  | 0.166744  | 1.83326 | 0.03480    | 0.03481    | 21.36100 |
| Ato_P9_2_2_2   | 0.467307  | 1.53269 | 0.03490    | 0.03493    | 45.00000 |
| Ato_P18_3_3_9  | 0.187424  | 1.81258 | 0.03598    | 0.03598    | 14.85820 |
| Ato_P13_2_3_5  | 0.219322  | 1.78068 | 0.03630    | 0.03631    | 23.35860 |
| Ato_P19_5_4_7  | 0.177479  | 1.82252 | 0.03688    | 0.03689    | 24.04950 |
| Ato_P19_5_2_9  | 0.870964  | 1.12904 | 0.00638    | 0.03694    | 12.76620 |
| Ato_P13_3_2_5  | 0.285926  | 1.71407 | 0.03729    | 0.03726    | 20.52400 |
| Ato_P16_4_3_6  | 0.21548   | 1.78452 | 0.03773    | 0.03773    | 22.57260 |
| Ato_P13_2_2_6  | 0.260139  | 1.73986 | 0.03870    | 0.03870    | 16.77780 |
| Ato_P14_2_4_5  | 0.246509  | 1.75349 | 0.03899    | 0.03903    | 11.25030 |
| Ato_P15_2_5_5  | 0.165659  | 1.83434 | 0.03879    | 0.03930    | 0.01185  |
| Ato_P10_2_2_3  | 0.318689  | 1.68131 | 0.03930    | 0.03932    | 27.37880 |
| Ato_P19_5_5_6  | 0.259631  | 1.74037 | 0.03946    | 0.03952    | 36.53730 |
| Ato_P19_3_5_8  | 0.143665  | 1.85634 | 0.04010    | 0.04011    | 22.76490 |
| Ato_P19_3_4_9  | 0.159425  | 1.84057 | 0.04101    | 0.04106    | 19.28530 |
| Ato_P20_3_6_8  | 0.147082  | 1.85292 | 0.04107    | 0.04109    | 17.06790 |
| Ato_P16_4_4_5  | 0.283375  | 1.71662 | 0.04275    | 0.04283    | 33.56250 |
| Ato_P13_3_3_4  | 0.309707  | 1.69029 | 0.04413    | 0.04412    | 30.46370 |
| Ato_P20_3_5_9  | 0.137999  | 1.862   | 0.04519    | 0.04518    | 21.95530 |
| Ato_P20_3_4_10 | 0.152802  | 1.8472  | 0.04566    | 0.04565    | 17.01330 |
| Ato_P18_5_2_8  | 0.235656  | 1.76434 | 0.04590    | 0.04588    | 14.52890 |
| Ato_P6_1_1_1   | 0.740071  | 1.25993 | 0.04665    | 0.04666    | 45.00000 |
| Ato_P19_6_5_5  | 0.226633  | 1.77337 | 0.04700    | 0.04702    | 45.00000 |
| Ato_P16_2_5_6  | 0.203769  | 1.79623 | 0.04897    | 0.04903    | 4.07489  |
| Ato_P14_2_3_6  | 0.209321  | 1.79068 | 0.04916    | 0.04921    | 21.72040 |
| Ato_P14_2_2_7  | 0.244274  | 1.75573 | 0.05073    | 0.05080    | 13.33380 |
| Ato_P18_5_3_7  | 0.20935   | 1.79065 | 0.05165    | 0.05170    | 20.64350 |
| Ato_P20_6_2_9  | 0.220914  | 1.77909 | 0.05494    | 0.05503    | 13.25490 |
| Ato_P16_3_2_8  | 0.0389045 | 1.9611  | 0.05528    | 0.01565    | 12.70060 |
| Ato_P15_2_4_6  | 0.174564  | 1.82544 | 0.05543    | 0.05543    | 21.37980 |
| Ato_P15_4_2_6  | 0.261749  | 1.73825 | 0.05605    | 0.05601    | 18.36450 |
| Ato_P17_2_6_6  | 0.120142  | 1.87986 | 0.05643    | 0.05644    | 0.01709  |



| name           | $c_l$     | $c_a$   | $\Delta_l$ | $\Delta_a$ | $\theta$ |
|----------------|-----------|---------|------------|------------|----------|
| Ato_P9_1_2_3   | 0.329877  | 1.67012 | 0.05648    | 0.05648    | 21.67050 |
| Ato_P15_2_3_7  | 0.19794   | 1.80206 | 0.05799    | 0.05801    | 19.21120 |
| Ato_P18_5_4_6  | 0.223305  | 1.7767  | 0.05788    | 0.05801    | 27.58520 |
| Ato_P16_5_4_4  | 0.276777  | 1.72322 | 0.05924    | 0.05934    | 45.00000 |
| Ato_P12_3_1_5  | 0.365188  | 1.63481 | 0.06017    | 0.06019    | 14.24830 |
| Ato_P20_6_3_8  | 0.197798  | 1.8022  | 0.06041    | 0.06042    | 19.04700 |
| Ato_P10_1_3_3  | 1         | 1       | 0.01235    | 0.06250    | 0.01509  |
| Ato_P17_2_5_7  | 0.171822  | 1.82818 | 0.06276    | 0.06280    | 16.38970 |
| Ato_P15_4_3_5  | 0.241375  | 1.75863 | 0.06263    | 0.06287    | 25.56150 |
| Ato_P16_2_4_7  | 0.165682  | 1.83432 | 0.06321    | 0.06328    | 22.01820 |
| Ato_P18_2_6_7  | 0.129582  | 1.87042 | 0.06348    | 0.06355    | 1.94489  |
| Ato_P20_6_4_7  | 0.192807  | 1.80719 | 0.06561    | 0.06567    | 24.38320 |
| Ato_P17_5_2_7  | 0.24941   | 1.75059 | 0.06752    | 0.06753    | 16.64980 |
| Ato_P20_6_5_6  | 0.314621  | 1.68538 | 0.06823    | 0.06821    | 45.00000 |
| Ato_P9_1_1_4   | 0.389903  | 1.6101  | 0.06853    | 0.06864    | 15.34870 |
| Ato_P19_2_7_7  | 0.091211  | 1.90879 | 0.06943    | 0.06948    | 0.01453  |
| Ato_P12_3_2_4  | 0.300247  | 1.69975 | 0.06982    | 0.06993    | 23.35730 |
| Ato_P20_7_5_5  | 0.233942  | 1.76606 | 0.07079    | 0.07087    | 45.00000 |
| Ato_P19_2_6_8  | 0.156391  | 1.84361 | 0.07149    | 0.07157    | 9.63766  |
| Ato_P17_2_4_8  | 0.146079  | 1.85392 | 0.07258    | 0.07269    | 20.57430 |
| Ato_P17_5_3_6  | 0.218399  | 1.7816  | 0.07347    | 0.07346    | 22.63200 |
| Ato_P18_2_5_8  | 0.127153  | 1.87285 | 0.07440    | 0.07444    | 20.94550 |
| Ato_P19_6_2_8  | 0.240037  | 1.75996 | 0.07452    | 0.07452    | 15.25320 |
| Ato_P20_2_7_8  | 0.0892474 | 1.91075 | 0.07457    | 0.07495    | 1.09263  |
| Ato_P9_2_1_3   | 0.426829  | 1.57317 | 0.07889    | 0.07891    | 20.40350 |
| Ato_P13_4_3_3  | 0.353887  | 1.64611 | 0.07883    | 0.07891    | 45.00000 |
| Ato_P19_6_3_7  | 0.207245  | 1.79275 | 0.08029    | 0.08037    | 20.56150 |
| Ato_P18_2_4_9  | 0.129307  | 1.87069 | 0.08115    | 0.08122    | 18.50410 |
| Ato_P20_2_6_9  | 0.114259  | 1.88574 | 0.08238    | 0.08240    | 18.20630 |
| Ato_P19_2_5_9  | 0.111588  | 1.88841 | 0.08316    | 0.08328    | 20.95670 |
| Ato_P11_1_3_4  | 0.263011  | 1.73699 | 0.08500    | 0.08501    | 7.42857  |
| Ato_P14_4_2_5  | 0.277284  | 1.72272 | 0.08516    | 0.08525    | 20.52060 |
| Ato_P14_4_1_6  | 0.436516  | 1.56348 | 0.06295    | 0.08611    | 12.66550 |
| Ato_P10_1_2_4  | 0.292295  | 1.70771 | 0.08607    | 0.08616    | 22.13050 |
| Ato_P17_5_4_5  | 0.390399  | 1.6096  | 0.08664    | 0.08668    | 44.99990 |
| Ato_P20_2_5_10 | 0.09987   | 1.90013 | 0.09039    | 0.09055    | 19.68580 |
| Ato_P17_6_4_4  | 0.285753  | 1.71425 | 0.09074    | 0.09074    | 45.00000 |
| Ato_P19_6_4_6  | 0.240523  | 1.75948 | 0.09187    | 0.09187    | 29.02300 |

| name          | $c_l$    | $c_a$   | $\Delta_l$ | $\Delta_a$ | $\theta$ |
|---------------|----------|---------|------------|------------|----------|
| Ato_P16_5_2_6 | 0.265971 | 1.73403 | 0.09415    | 0.09430    | 18.46550 |
| Ato_P18_6_2_7 | 0.259592 | 1.74041 | 0.09929    | 0.09930    | 16.89460 |



## 2.24 Atd

### 2.24.1 Near-Miss Cages

| name           | $c_l$      | $c_a$   | $\Delta_l$ | $\Delta_a$ | $\theta$ |
|----------------|------------|---------|------------|------------|----------|
| Atd_P12_1_4_4  | 0.00107152 | 1.99893 | 0.00007    | 0.00003    | 1.14711  |
| Atd_P17_2_6_6  | 0.40738    | 1.59262 | 0.00006    | 0.00020    | 20.90520 |
| Atd_P18_2_6_7  | 0.121335   | 1.87866 | 0.00199    | 0.00200    | 10.97890 |
| Atd_P18_2_4_9  | 0.1003     | 1.8997  | 0.00249    | 0.00249    | 7.94446  |
| Atd_P12_1_3_5  | 0.122989   | 1.87701 | 0.00345    | 0.00346    | 10.06450 |
| Atd_P12_1_2_6  | 0.124137   | 1.87586 | 0.00433    | 0.00433    | 6.46732  |
| Atd_P17_2_4_8  | 0.114341   | 1.88566 | 0.00516    | 0.00518    | 8.79727  |
| Atd_P17_2_5_7  | 0.114312   | 1.88569 | 0.00536    | 0.00539    | 10.58280 |
| Atd_P19_2_7_7  | 0.0841153  | 1.91588 | 0.00655    | 0.00658    | 0.02454  |
| Atd_P19_2_6_8  | 0.0891251  | 1.91087 | 0.00854    | 0.00866    | 10.76210 |
| Atd_P19_2_5_9  | 0.0891251  | 1.91087 | 0.00879    | 0.00890    | 9.44160  |
| Atd_P16_2_3_8  | 0.133419   | 1.86658 | 0.01345    | 0.01352    | 6.92457  |
| Atd_P20_3_7_7  | 0.126747   | 1.87325 | 0.01357    | 0.01357    | 20.90520 |
| Atd_P16_2_5_6  | 0.150251   | 1.84975 | 0.01382    | 0.01383    | 11.45120 |
| Atd_P16_2_4_7  | 0.131542   | 1.86846 | 0.01385    | 0.01392    | 9.52238  |
| Atd_P20_2_7_8  | 0.0991823  | 1.90082 | 0.01398    | 0.01405    | 10.01850 |
| Atd_P20_2_6_9  | 0.0776082  | 1.92239 | 0.01458    | 0.01461    | 10.41400 |
| Atd_P11_1_2_5  | 0.149603   | 1.8504  | 0.01460    | 0.01468    | 7.92515  |
| Atd_P20_2_5_10 | 0.0781756  | 1.92182 | 0.01489    | 0.01489    | 8.70615  |
| Atd_P11_1_3_4  | 0.146469   | 1.85353 | 0.01512    | 0.01516    | 10.90050 |
| Atd_P20_3_4_10 | 0.134896   | 1.8651  | 0.01673    | 0.01726    | 7.19113  |
| Atd_P20_3_5_9  | 0.128679   | 1.87132 | 0.01746    | 0.01747    | 9.16404  |
| Atd_P20_3_6_8  | 0.128504   | 1.8715  | 0.01746    | 0.01749    | 10.62710 |
| Atd_P13_1_4_5  | 0.103118   | 1.89688 | 0.01820    | 0.01820    | 10.69870 |
| Atd_P15_2_5_5  | 0.155113   | 1.84489 | 0.01855    | 0.01855    | 20.90520 |
| Atd_P13_1_3_6  | 0.104186   | 1.89581 | 0.01889    | 0.01890    | 9.10407  |
| Atd_P19_3_4_9  | 0.149446   | 1.85055 | 0.02339    | 0.02365    | 7.90639  |
| Atd_P15_2_3_7  | 0.156009   | 1.84399 | 0.02343    | 0.02371    | 7.91565  |
| Atd_P19_3_5_8  | 0.148801   | 1.8512  | 0.02352    | 0.02379    | 9.62771  |
| Atd_P15_2_4_6  | 0.155036   | 1.84496 | 0.02370    | 0.02395    | 10.14110 |
| Atd_P19_3_6_7  | 0.16929    | 1.83071 | 0.02469    | 0.02469    | 12.50720 |
| Atd_P18_3_6_6  | 0.168464   | 1.83154 | 0.02676    | 0.02679    | 20.90520 |
| Atd_P14_1_5_5  | 1          | 1       | 0.00213    | 0.02778    | 0.01952  |
| Atd_P10_1_3_3  | 1          | 1       | 0.00567    | 0.02974    | 20.90520 |
| Atd_P18_3_3_9  | 0.169563   | 1.83044 | 0.03054    | 0.03059    | 6.20911  |
| Atd_P18_3_4_8  | 0.171477   | 1.82852 | 0.03026    | 0.03087    | 8.48629  |
| Atd_P18_3_5_7  | 0.167523   | 1.83248 | 0.03070    | 0.03089    | 10.15980 |
| Atd_P14_1_4_6  | 0.0884582  | 1.91154 | 0.03115    | 0.03116    | 10.50800 |

| name           | $c_l$     | $c_a$   | $\Delta_l$ | $\Delta_a$ | $\theta$ |
|----------------|-----------|---------|------------|------------|----------|
| Atd_P14_1_3_7  | 0.0896625 | 1.91034 | 0.03181    | 0.03187    | 7.94976  |
| Atd_P14_2_2_7  | 0.182921  | 1.81708 | 0.03498    | 0.03500    | 5.50421  |
| Atd_P14_2_4_5  | 0.189226  | 1.81077 | 0.03531    | 0.03533    | 11.37890 |
| Atd_P14_2_3_6  | 0.180043  | 1.81996 | 0.03551    | 0.03558    | 8.72909  |
| Atd_P10_1_2_4  | 0.177046  | 1.82295 | 0.03820    | 0.03825    | 9.16123  |
| Atd_P17_3_3_8  | 0.192681  | 1.80732 | 0.03922    | 0.03922    | 7.00880  |
| Atd_P17_3_4_7  | 0.187029  | 1.81297 | 0.04002    | 0.04001    | 8.93139  |
| Atd_P15_1_5_6  | 0.0828259 | 1.91717 | 0.04086    | 0.04091    | 9.80568  |
| Atd_P15_1_4_7  | 0.0764446 | 1.92356 | 0.04198    | 0.04212    | 9.83023  |
| Atd_P20_4_4_9  | 0.166119  | 1.83388 | 0.04334    | 0.04335    | 7.61112  |
| Atd_P13_2_4_4  | 0.227009  | 1.77299 | 0.04383    | 0.04385    | 20.90520 |
| Atd_P17_3_5_6  | 0.19279   | 1.80721 | 0.04388    | 0.04400    | 12.33940 |
| Atd_P20_4_5_8  | 0.160681  | 1.83932 | 0.04383    | 0.04405    | 8.97320  |
| Atd_P16_3_5_5  | 0.217332  | 1.78267 | 0.04655    | 0.04661    | 20.90520 |
| Atd_P16_1_6_6  | 0.933254  | 1.06675 | 0.00292    | 0.04762    | 0.00317  |
| Atd_P19_4_6_6  | 0.187185  | 1.81281 | 0.04885    | 0.04888    | 20.90520 |
| Atd_P13_2_2_6  | 0.22614   | 1.77386 | 0.04907    | 0.04924    | 6.69873  |
| Atd_P13_2_3_5  | 0.212888  | 1.78711 | 0.04954    | 0.04958    | 9.36789  |
| Atd_P20_4_6_7  | 0.177656  | 1.82234 | 0.05009    | 0.05005    | 13.84340 |
| Atd_P16_1_5_7  | 0.0663939 | 1.93361 | 0.05072    | 0.05081    | 10.59030 |
| Atd_P16_3_3_7  | 0.21079   | 1.78921 | 0.05195    | 0.05197    | 7.60693  |
| Atd_P16_3_4_6  | 0.199552  | 1.80045 | 0.05282    | 0.05299    | 9.41253  |
| Atd_P19_4_3_9  | 0.18564   | 1.81436 | 0.05323    | 0.05344    | 6.28479  |
| Atd_P19_4_4_8  | 0.179637  | 1.82036 | 0.05393    | 0.05408    | 7.89480  |
| Atd_P19_4_5_7  | 0.172251  | 1.82775 | 0.05537    | 0.05539    | 9.55699  |
| Atd_P17_1_6_7  | 0.0671982 | 1.9328  | 0.05717    | 0.05718    | 8.13690  |
| Atd_P17_1_5_8  | 0.0581827 | 1.94182 | 0.05897    | 0.05908    | 10.24290 |
| Atd_P20_4_3_10 | 0.141859  | 1.85814 | 0.06077    | 0.06075    | 6.23573  |
| Atd_P18_1_7_7  | 1         | 1       | 0.00252    | 0.06250    | 0.01364  |
| Atd_P18_1_6_8  | 0.0511183 | 1.94888 | 0.06535    | 0.06540    | 10.37340 |
| Atd_P18_1_5_9  | 0.0518252 | 1.94817 | 0.06623    | 0.06629    | 9.56002  |
| Atd_P12_2_2_5  | 0.270075  | 1.72992 | 0.06614    | 0.06633    | 7.59475  |
| Atd_P18_4_3_8  | 0.199591  | 1.80041 | 0.06626    | 0.06634    | 6.72479  |
| Atd_P18_4_4_7  | 0.192137  | 1.80786 | 0.06703    | 0.06709    | 8.07371  |
| Atd_P9_1_1_4   | 0.229061  | 1.77094 | 0.06719    | 0.06731    | 6.11984  |
| Atd_P15_3_3_6  | 0.227502  | 1.7725  | 0.06773    | 0.06782    | 7.98535  |
| Atd_P9_1_2_3   | 0.222342  | 1.77766 | 0.06812    | 0.06814    | 10.30100 |
| Atd_P12_2_3_4  | 0.267679  | 1.73232 | 0.06814    | 0.06816    | 10.63330 |

| name           | $c_l$     | $c_a$   | $\Delta_l$ | $\Delta_a$ | $\theta$ |
|----------------|-----------|---------|------------|------------|----------|
| Atd_P19_1_7_8  | 0.0548226 | 1.94518 | 0.06920    | 0.06937    | 5.55987  |
| Atd_P20_5_6_6  | 0.19299   | 1.80701 | 0.07149    | 0.07158    | 20.90510 |
| Atd_P19_1_6_9  | 0.0457068 | 1.95429 | 0.07187    | 0.07197    | 10.40950 |
| Atd_P15_3_4_5  | 0.223534  | 1.77647 | 0.07270    | 0.07270    | 11.61850 |
| Atd_P20_1_8_8  | 1         | 1       | 0.00230    | 0.07407    | 0.01786  |
| Atd_P18_4_5_6  | 0.203798  | 1.7962  | 0.07456    | 0.07458    | 13.12130 |
| Atd_P17_4_5_5  | 0.224405  | 1.77559 | 0.07656    | 0.07656    | 20.90520 |
| Atd_P20_1_7_9  | 0.0418715 | 1.95813 | 0.07650    | 0.07659    | 9.86978  |
| Atd_P20_5_3_9  | 0.191792  | 1.80821 | 0.07631    | 0.07666    | 6.02634  |
| Atd_P20_1_6_10 | 0.0411615 | 1.95884 | 0.07764    | 0.07770    | 9.96011  |
| Atd_P20_5_5_7  | 0.180059  | 1.81994 | 0.07887    | 0.07893    | 8.80273  |
| Atd_P16_1_4_8  | 0.217568  | 1.78243 | 0.08039    | 0.08056    | 6.28800  |
| Atd_P15_3_2_7  | 0.176387  | 1.82361 | 0.08062    | 0.08069    | 6.27986  |
| Atd_P14_3_4_4  | 0.269134  | 1.73087 | 0.08123    | 0.08131    | 20.90520 |
| Atd_P10_1_1_5  | 0.327766  | 1.67223 | 0.08162    | 0.08159    | 5.61964  |
| Atd_P17_4_3_7  | 0.220013  | 1.77999 | 0.08244    | 0.08252    | 6.90536  |
| Atd_P11_2_3_3  | 0.33567   | 1.66433 | 0.08435    | 0.08434    | 20.90520 |
| Atd_P14_3_2_6  | 0.266669  | 1.73333 | 0.08734    | 0.08745    | 6.46895  |
| Atd_P14_3_3_5  | 0.251189  | 1.74881 | 0.08847    | 0.08847    | 8.27579  |
| Atd_P11_2_1_5  | 0.338945  | 1.66105 | 0.09024    | 0.09026    | 4.90386  |
| Atd_P11_2_2_4  | 0.318041  | 1.68196 | 0.09187    | 0.09187    | 8.12336  |
| Atd_P19_5_3_8  | 0.208403  | 1.7916  | 0.09212    | 0.09210    | 6.07462  |
| Atd_P19_5_4_7  | 0.201086  | 1.79891 | 0.09255    | 0.09289    | 6.91835  |
| Atd_P16_3_2_8  | 0.221324  | 1.77868 | 0.09821    | 0.09821    | 6.15065  |
| Atd_P8_1_2_2   | 0.812831  | 1.18717 | 0.04650    | 0.09839    | 20.90510 |
| Atd_P18_2_5_8  | 0.273629  | 1.72637 | 0.09898    | 0.09900    | 2.30235  |

## 2.25 Ati

### 2.25.1 Regular Cages

| name          | $\theta$ | name | $\theta$ | name | $\theta$ |
|---------------|----------|------|----------|------|----------|
| Ati_P20_5_6_6 | 3.0675   |      |          |      |          |

### 2.25.2 Near-Miss Cages

| name          | $c_l$    | $c_a$    | $\Delta_l$ | $\Delta_a$ | $\theta$ |
|---------------|----------|----------|------------|------------|----------|
| Ati_P16_4_2_7 | 0.239208 | 1.76079  | 0.00042    | 0.00042    | 12.34810 |
| Ati_P13_3_3_4 | 0.255459 | 1.74454  | 0.00184    | 0.00184    | 19.55210 |
| Ati_P16_4_3_6 | 0.225374 | 1.77463  | 0.00189    | 0.00189    | 17.27020 |
| Ati_P16_4_4_5 | 0.224713 | 1.77529  | 0.00270    | 0.00270    | 19.93720 |
| Ati_P13_3_2_5 | 0.292838 | 1.70716  | 0.00289    | 0.00290    | 15.87800 |
| Ati_P19_5_3_8 | 0.198598 | 1.8014   | 0.00336    | 0.00337    | 14.58580 |
| Ati_P17_4_5_5 | 0.213781 | 1.78622  | 0.00413    | 0.00414    | 0.01635  |
| Ati_P19_5_4_7 | 0.188117 | 1.81188  | 0.00433    | 0.00433    | 18.05100 |
| Ati_P19_5_5_6 | 0.200075 | 1.79993  | 0.00506    | 0.00506    | 20.40460 |
| Ati_P20_5_5_7 | 0.163526 | 1.83647  | 0.00686    | 0.00686    | 19.20010 |
| Ati_P18_5_5_5 | 0.217837 | 1.78216  | 0.00693    | 0.00692    | 31.71750 |
| Ati_P20_5_4_8 | 0.176473 | 1.82353  | 0.00715    | 0.00716    | 16.97200 |
| Ati_P20_5_3_9 | 0.185052 | 1.81495  | 0.00790    | 0.00791    | 12.91690 |
| Ati_P15_4_4_4 | 1.06675  | 0.933254 | 0.00150    | 0.01036    | 31.71750 |
| Ati_P10_2_2_3 | 0.340323 | 1.65968  | 0.01141    | 0.01141    | 19.20670 |
| Ati_P14_3_4_4 | 0.261342 | 1.73866  | 0.01158    | 0.01160    | 0.01361  |
| Ati_P17_4_4_6 | 0.193684 | 1.80632  | 0.01239    | 0.01241    | 18.97120 |
| Ati_P12_3_3_3 | 1.06675  | 0.933254 | 0.00249    | 0.01254    | 31.71750 |
| Ati_P17_4_3_7 | 0.208798 | 1.7912   | 0.01279    | 0.01280    | 15.75730 |
| Ati_P10_2_1_4 | 0.386364 | 1.61364  | 0.01315    | 0.01315    | 12.99060 |
| Ati_P9_2_2_2  | 1.06675  | 0.933254 | 0.00475    | 0.01556    | 31.71750 |
| Ati_P18_5_2_8 | 0.224404 | 1.7756   | 0.01582    | 0.01584    | 11.33900 |
| Ati_P18_5_3_7 | 0.213382 | 1.78662  | 0.01774    | 0.01774    | 15.99810 |
| Ati_P6_1_1_1  | 1.06675  | 0.933254 | 0.01140    | 0.01892    | 31.71750 |
| Ati_P18_5_4_6 | 0.198327 | 1.80167  | 0.01897    | 0.01903    | 19.08560 |
| Ati_P15_4_2_6 | 0.260544 | 1.73946  | 0.01941    | 0.01940    | 14.35580 |
| Ati_P12_3_1_5 | 0.351545 | 1.64846  | 0.02111    | 0.02116    | 11.25890 |
| Ati_P15_4_3_5 | 0.241847 | 1.75815  | 0.02132    | 0.02134    | 18.50250 |
| Ati_P14_3_3_5 | 0.246391 | 1.75361  | 0.02206    | 0.02207    | 18.58110 |
| Ati_P19_4_6_6 | 0.178282 | 1.82172  | 0.02243    | 0.02244    | 0.00527  |
| Ati_P14_3_2_6 | 0.265918 | 1.73408  | 0.02267    | 0.02266    | 13.61790 |
| Ati_P18_4_4_7 | 0.183282 | 1.81672  | 0.02363    | 0.02364    | 18.06590 |
| Ati_P18_4_5_6 | 0.184278 | 1.81572  | 0.02384    | 0.02387    | 16.16780 |
| Ati_P18_4_3_8 | 0.193607 | 1.80639  | 0.02392    | 0.02392    | 13.92580 |
| Ati_P12_3_2_4 | 0.322278 | 1.67772  | 0.02462    | 0.02461    | 17.62690 |
| Ati_P11_2_3_3 | 0.328431 | 1.67157  | 0.02624    | 0.02624    | 0.00529  |
| Ati_P9_2_1_3  | 0.441574 | 1.55843  | 0.02827    | 0.02827    | 15.92410 |
| Ati_P20_6_3_8 | 0.197655 | 1.80235  | 0.02853    | 0.02852    | 14.91880 |

| name           | $c_l$     | $c_a$    | $\Delta_l$ | $\Delta_a$ | $\theta$ |
|----------------|-----------|----------|------------|------------|----------|
| Ati_P20_6_4_7  | 0.187671  | 1.81233  | 0.02997    | 0.03002    | 17.88670 |
| Ati_P19_4_4_8  | 0.172189  | 1.82781  | 0.03210    | 0.03210    | 16.73180 |
| Ati_P19_4_3_9  | 0.180648  | 1.81935  | 0.03220    | 0.03225    | 11.91050 |
| Ati_P19_4_5_7  | 0.159459  | 1.84054  | 0.03258    | 0.03259    | 18.74980 |
| Ati_P19_6_5_5  | 0.224521  | 1.77548  | 0.03276    | 0.03287    | 31.71750 |
| Ati_P20_6_5_6  | 0.215236  | 1.78476  | 0.03359    | 0.03359    | 22.94250 |
| Ati_P17_5_2_7  | 0.243616  | 1.75638  | 0.03366    | 0.03371    | 13.15250 |
| Ati_P20_4_6_7  | 0.149793  | 1.85021  | 0.03440    | 0.03450    | 6.66971  |
| Ati_P16_3_5_5  | 0.21399   | 1.78601  | 0.03448    | 0.03459    | 0.00729  |
| Ati_P20_6_2_9  | 1.12904   | 0.870964 | 0.00340    | 0.03463    | 10.97730 |
| Ati_P17_5_3_6  | 0.229748  | 1.77025  | 0.03600    | 0.03601    | 17.12300 |
| Ati_P15_3_3_6  | 0.228187  | 1.77181  | 0.03639    | 0.03640    | 17.13630 |
| Ati_P15_3_4_5  | 0.202636  | 1.79736  | 0.03642    | 0.03643    | 16.56920 |
| Ati_P15_3_2_7  | 0.243688  | 1.75631  | 0.03672    | 0.03676    | 11.06330 |
| Ati_P7_1_1_2   | 0.561058  | 1.43894  | 0.03739    | 0.03739    | 18.63950 |
| Ati_P17_4_2_8  | 0.0295121 | 1.97049  | 0.03836    | 0.00911    | 10.61810 |
| Ati_P20_4_4_9  | 0.16145   | 1.83855  | 0.03840    | 0.03841    | 15.08400 |
| Ati_P20_4_5_8  | 0.15276   | 1.84724  | 0.03887    | 0.03888    | 18.44860 |
| Ati_P11_2_2_4  | 0.31144   | 1.68856  | 0.03981    | 0.03981    | 17.73460 |
| Ati_P17_5_4_5  | 0.24419   | 1.75581  | 0.04012    | 0.04012    | 22.01830 |
| Ati_P19_6_2_8  | 0.229549  | 1.77045  | 0.04312    | 0.04312    | 12.17470 |
| Ati_P16_5_4_4  | 0.274676  | 1.72532  | 0.04318    | 0.04322    | 31.71750 |
| Ati_P20_4_3_10 | 0.144544  | 1.85546  | 0.04428    | 0.03736    | 9.96330  |
| Ati_P14_4_2_5  | 0.284549  | 1.71545  | 0.04426    | 0.04429    | 15.95560 |
| Ati_P19_6_3_7  | 0.211768  | 1.78823  | 0.04532    | 0.04532    | 15.94970 |
| Ati_P16_3_3_7  | 0.210551  | 1.78945  | 0.04654    | 0.04653    | 15.15710 |
| Ati_P18_3_6_6  | 0.179297  | 1.8207   | 0.04656    | 0.04667    | 0.01144  |
| Ati_P16_3_4_6  | 0.195452  | 1.80455  | 0.04732    | 0.04740    | 18.70970 |
| Ati_P19_6_4_6  | 0.204868  | 1.79513  | 0.04780    | 0.04784    | 19.16070 |
| Ati_P14_4_3_4  | 0.279771  | 1.72023  | 0.04899    | 0.04900    | 20.98020 |
| Ati_P17_3_5_6  | 0.179553  | 1.82045  | 0.04971    | 0.04969    | 7.14010  |
| Ati_P17_3_3_8  | 0.195333  | 1.80467  | 0.05365    | 0.05367    | 12.90870 |
| Ati_P17_3_4_7  | 0.183797  | 1.8162   | 0.05432    | 0.05435    | 17.84870 |
| Ati_P19_3_6_7  | 0.158633  | 1.84137  | 0.05568    | 0.05575    | 3.54878  |
| Ati_P16_5_2_6  | 0.269096  | 1.7309   | 0.05654    | 0.05657    | 14.62190 |
| Ati_P20_7_5_5  | 0.231572  | 1.76843  | 0.05655    | 0.05660    | 31.71750 |
| Ati_P13_2_4_4  | 0.243437  | 1.75656  | 0.05667    | 0.05680    | 0.01390  |
| Ati_P11_3_1_4  | 0.393918  | 1.60608  | 0.05788    | 0.05791    | 13.80920 |



| name           | $c_l$     | $c_a$   | $\Delta_l$ | $\Delta_a$ | $\theta$ |
|----------------|-----------|---------|------------|------------|----------|
| Ati_P20_3_7_7  | 0.13757   | 1.86243 | 0.05826    | 0.05832    | 0.01667  |
| Ati_P12_2_2_5  | 0.28115   | 1.71885 | 0.05838    | 0.05841    | 15.29290 |
| Ati_P18_3_3_9  | 0.182622  | 1.81738 | 0.05843    | 0.05851    | 10.59260 |
| Ati_P18_3_4_8  | 0.172737  | 1.82726 | 0.05915    | 0.05918    | 16.22080 |
| Ati_P16_5_3_5  | 0.245827  | 1.75417 | 0.05919    | 0.05925    | 18.32360 |
| Ati_P12_2_3_4  | 0.248701  | 1.7513  | 0.05925    | 0.05926    | 17.20880 |
| Ati_P13_4_3_3  | 0.351855  | 1.64814 | 0.06014    | 0.06016    | 31.71750 |
| Ati_P18_3_5_7  | 0.160398  | 1.8396  | 0.06071    | 0.06073    | 18.06860 |
| Ati_P19_3_4_9  | 0.161917  | 1.83808 | 0.06242    | 0.06253    | 14.26850 |
| Ati_P11_3_2_3  | 0.356028  | 1.64397 | 0.06362    | 0.06366    | 19.77140 |
| Ati_P19_3_5_8  | 0.152614  | 1.84739 | 0.06375    | 0.06376    | 18.12550 |
| Ati_P18_6_2_7  | 0.251875  | 1.74813 | 0.06375    | 0.06383    | 13.54840 |
| Ati_P20_3_5_9  | 0.144514  | 1.85549 | 0.06564    | 0.06561    | 16.92250 |
| Ati_P18_6_3_6  | 0.228172  | 1.77183 | 0.06601    | 0.06602    | 16.81240 |
| Ati_P20_3_4_10 | 0.147805  | 1.8522  | 0.06640    | 0.06666    | 12.24090 |
| Ati_P8_1_2_2   | 0.57544   | 1.42456 | 0.05229    | 0.06667    | 0.01486  |
| Ati_P20_3_6_8  | 0.135911  | 1.86409 | 0.06699    | 0.06704    | 16.41450 |
| Ati_P20_7_2_8  | 0.237197  | 1.7628  | 0.06794    | 0.06806    | 12.65420 |
| Ati_P13_2_2_6  | 0.254858  | 1.74514 | 0.07017    | 0.07033    | 12.35740 |
| Ati_P20_7_3_7  | 0.219213  | 1.78079 | 0.07058    | 0.07066    | 15.69260 |
| Ati_P13_2_3_5  | 0.234143  | 1.76586 | 0.07169    | 0.07184    | 18.38730 |
| Ati_P13_4_1_5  | 0.362918  | 1.63708 | 0.07356    | 0.07355    | 12.26080 |
| Ati_P14_2_4_5  | 0.211371  | 1.78863 | 0.07405    | 0.07397    | 7.56426  |
| Ati_P17_6_4_4  | 0.283395  | 1.71661 | 0.07454    | 0.07455    | 31.71750 |
| Ati_P20_7_4_6  | 0.218612  | 1.78139 | 0.07474    | 0.07481    | 19.26330 |
| Ati_P18_6_4_5  | 0.261985  | 1.73801 | 0.07489    | 0.07496    | 23.65380 |
| Ati_P13_4_2_4  | 0.312672  | 1.68733 | 0.07701    | 0.07701    | 17.24850 |
| Ati_P14_2_3_6  | 0.215837  | 1.78416 | 0.07902    | 0.07908    | 16.64410 |
| Ati_P15_2_5_5  | 0.172571  | 1.82743 | 0.07842    | 0.07911    | 0.00999  |
| Ati_P15_5_1_6  | 0.322569  | 1.67743 | 0.08204    | 0.08204    | 10.99870 |
| Ati_P8_1_1_3   | 0.481343  | 1.51866 | 0.08270    | 0.08277    | 15.44230 |
| Ati_P14_2_2_7  | 0.212696  | 1.7873  | 0.08414    | 0.08112    | 9.49386  |
| Ati_P15_5_2_5  | 0.297746  | 1.70225 | 0.08567    | 0.08567    | 15.68310 |
| Ati_P11_2_1_5  | 0.0724436 | 1.92756 | 0.08628    | 0.03390    | 10.49630 |
| Ati_P15_2_4_6  | 0.182239  | 1.81776 | 0.08667    | 0.08674    | 18.09510 |
| Ati_P16_2_5_6  | 0.156801  | 1.8432  | 0.08802    | 0.08813    | 3.15507  |
| Ati_P17_6_2_6  | 0.279429  | 1.72057 | 0.08960    | 0.08959    | 14.53150 |
| Ati_P15_2_3_7  | 0.184226  | 1.81577 | 0.08950    | 0.08965    | 14.29710 |

| name          | $c_l$    | $c_a$   | $\Delta_l$ | $\Delta_a$ | $\theta$ |
|---------------|----------|---------|------------|------------|----------|
| Ati_P19_7_2_7 | 0.260052 | 1.73995 | 0.09063    | 0.09061    | 13.61630 |
| Ati_P10_3_2_2 | 0.487197 | 1.5128  | 0.09130    | 0.09136    | 31.71750 |
| Ati_P8_2_1_2  | 0.534086 | 1.46591 | 0.09251    | 0.09255    | 18.20370 |
| Ati_P17_6_3_5 | 0.255662 | 1.74434 | 0.09300    | 0.09314    | 18.14940 |
| Ati_P19_7_3_6 | 0.236224 | 1.76378 | 0.09319    | 0.09324    | 16.43370 |
| Ati_P17_2_6_6 | 0.125638 | 1.87436 | 0.09491    | 0.09525    | 0.04171  |
| Ati_P15_5_3_4 | 0.306825 | 1.69317 | 0.09528    | 0.09528    | 22.17700 |
| Ati_P16_2_4_7 | 0.155045 | 1.84496 | 0.09668    | 0.09671    | 17.38640 |
| Ati_P16_2_3_8 | 0.157808 | 1.84219 | 0.09890    | 0.09900    | 11.83920 |

## 2.26 Aco

### 2.26.1 Regular Cages

| name            | name            | name            |
|-----------------|-----------------|-----------------|
| Aco_P10_1_1_1_3 | Aco_P15_2_2_2_5 | Aco_P20_3_3_3_7 |
| Aco_P12_1_2_3_2 |                 |                 |

### 2.26.2 Near-Miss Cages

| name            | $c_l$      | $c_a$      | $\Delta_l$ | $\Delta_a$ |
|-----------------|------------|------------|------------|------------|
| Aco_P17_2_4_3_4 | 1.98953    | 0.0104713  | 0.00000    | 0.00083    |
| Aco_P18_2_4_4_4 | 1.97911    | 0.020893   | 0.00000    | 0.00140    |
| Aco_P20_3_4_3_6 | 0.0414428  | 1.95856    | 0.00174    | 0.00174    |
| Aco_P20_3_5_3_5 | 1.99826    | 0.0017378  | 0.00000    | 0.00227    |
| Aco_P15_2_3_2_4 | 0.0183446  | 1.98166    | 0.00282    | 0.00282    |
| Aco_P10_1_2_1_2 | 0.0223872  | 1.97761    | 0.00003    | 0.00511    |
| Aco_P16_2_4_2_4 | 1.82217    | 0.177828   | 0.00000    | 0.00641    |
| Aco_P19_2_4_5_4 | 1.98798    | 0.0120226  | 0.00000    | 0.00667    |
| Aco_P19_3_3_3_6 | 0.0873413  | 1.91266    | 0.00715    | 0.00719    |
| Aco_P16_2_3_2_5 | 0.0586491  | 1.94135    | 0.00754    | 0.00754    |
| Aco_P19_3_4_3_5 | 0.0142192  | 1.98578    | 0.00802    | 0.00802    |
| Aco_P14_2_2_2_4 | 0.101549   | 1.89845    | 0.01284    | 0.01285    |
| Aco_P17_2_3_5_3 | 0.189554   | 1.81045    | 0.01424    | 0.01424    |
| Aco_P14_2_3_2_3 | 1.9805     | 0.0194984  | 0.00000    | 0.01429    |
| Aco_P18_3_3_3_5 | 0.0651052  | 1.93489    | 0.01438    | 0.01440    |
| Aco_P18_3_4_3_4 | 0.501187   | 1.49881    | 0.00004    | 0.01480    |
| Aco_P17_2_4_2_5 | 0.00374199 | 1.99626    | 0.01477    | 0.01490    |
| Aco_P11_1_2_2_2 | 1.99397    | 0.0060256  | 0.00001    | 0.01490    |
| Aco_P20_2_5_4_5 | 1.98521    | 0.0147911  | 0.00001    | 0.01533    |
| Aco_P19_2_5_3_5 | 1.99602    | 0.00398107 | 0.00000    | 0.01570    |
| Aco_P16_2_3_4_3 | 1.94871    | 0.0512861  | 0.00004    | 0.01577    |
| Aco_P20_2_4_6_4 | 0.314987   | 1.68501    | 0.01598    | 0.01598    |
| Aco_P17_2_3_2_6 | 0.0889899  | 1.91101    | 0.01702    | 0.01708    |
| Aco_P11_1_2_1_3 | 0.0155259  | 1.98447    | 0.01798    | 0.01807    |
| Aco_P20_3_4_5_4 | 1.99771    | 0.00229087 | 0.00000    | 0.01832    |
| Aco_P18_2_4_3_5 | 0.261687   | 1.73831    | 0.02094    | 0.02096    |
| Aco_P19_3_4_4_4 | 1.7116     | 0.288403   | 0.00026    | 0.02131    |
| Aco_P18_2_5_2_5 | 1.74881    | 0.251189   | 0.00002    | 0.02194    |
| Aco_P17_3_3_3_4 | 0.0289407  | 1.97106    | 0.02205    | 0.02212    |
| Aco_P15_2_3_3_3 | 1.99698    | 0.00301995 | 0.00000    | 0.02213    |
| Aco_P18_2_4_2_6 | 0.0333494  | 1.96665    | 0.02274    | 0.02276    |
| Aco_P13_1_3_2_3 | 1.99023    | 0.00977237 | 0.00001    | 0.02353    |
| Aco_P20_2_5_3_6 | 0.436516   | 1.56348    | 0.00740    | 0.02393    |
| Aco_P20_4_4_4_4 | 1.49881    | 0.501187   | 0.00003    | 0.02406    |
| Aco_P19_3_3_6_3 | 0.0017378  | 1.99826    | 0.01091    | 0.02452    |
| Aco_P20_3_4_4_5 | 0.171298   | 1.8287     | 0.02568    | 0.02569    |
| Aco_P13_2_2_2_3 | 0.050003   | 1.95       | 0.02681    | 0.02699    |
| Aco_P19_2_5_2_6 | 0.00199526 | 1.998      | 0.02376    | 0.02847    |

| name            | $c_l$      | $c_a$      | $\Delta_l$ | $\Delta_a$ |
|-----------------|------------|------------|------------|------------|
| Aco_P14_1_3_3_3 | 1.99885    | 0.00114815 | 0.00000    | 0.02870    |
| Aco_P17_3_2_3_5 | 0.102081   | 1.89792    | 0.02861    | 0.02872    |
| Aco_P18_2_3_2_7 | 0.0954993  | 1.9045     | 0.02962    | 0.02590    |
| Aco_P20_4_3_4_5 | 0.0513403  | 1.94866    | 0.02997    | 0.03003    |
| Aco_P19_2_4_2_7 | 0.0568068  | 1.94319    | 0.03013    | 0.03013    |
| Aco_P16_3_3_3_3 | 0.331131   | 1.66887    | 0.00014    | 0.03092    |
| Aco_P9_1_1_1_2  | 0.0956079  | 1.90439    | 0.03216    | 0.03217    |
| Aco_P18_3_3_5_3 | 0.164436   | 1.83556    | 0.03218    | 0.03222    |
| Aco_P19_2_4_3_6 | 0.191055   | 1.80895    | 0.03287    | 0.03296    |
| Aco_P20_2_6_2_6 | 1.82217    | 0.177828   | 0.00001    | 0.03401    |
| Aco_P19_2_4_4_5 | 0.347009   | 1.65299    | 0.03414    | 0.03414    |
| Aco_P20_2_5_2_7 | 0.0198962  | 1.9801     | 0.03401    | 0.03460    |
| Aco_P12_1_3_1_3 | 1.80945    | 0.190546   | 0.00001    | 0.03510    |
| Aco_P18_2_3_3_6 | 0.197942   | 1.80206    | 0.03576    | 0.03578    |
| Aco_P20_2_4_3_7 | 0.151146   | 1.84885    | 0.03676    | 0.03677    |
| Aco_P14_2_2_4_2 | 0.00151356 | 1.99849    | 0.01779    | 0.03704    |
| Aco_P20_2_4_2_8 | 0.0766299  | 1.92337    | 0.03711    | 0.03711    |
| Aco_P19_4_3_4_4 | 0.0549541  | 1.94505    | 0.02160    | 0.03795    |
| Aco_P12_1_2_1_4 | 0.0805185  | 1.91948    | 0.03807    | 0.03808    |
| Aco_P15_1_3_4_3 | 1          | 1          | 0.00504    | 0.03846    |
| Aco_P16_2_3_3_4 | 0.262748   | 1.73725    | 0.03876    | 0.03876    |
| Aco_P17_3_3_4_3 | 0.218776   | 1.78122    | 0.03082    | 0.03894    |
| Aco_P16_3_2_3_4 | 0.0762715  | 1.92373    | 0.04041    | 0.04044    |
| Aco_P20_2_4_5_5 | 0.422106   | 1.57789    | 0.04173    | 0.04173    |
| Aco_P20_3_3_4_6 | 0.142144   | 1.85786    | 0.04266    | 0.04267    |
| Aco_P12_2_2_2_2 | 0.707946   | 1.29205    | 0.00005    | 0.04328    |
| Aco_P20_4_3_6_3 | 0.171607   | 1.82839    | 0.04335    | 0.04342    |
| Aco_P17_2_3_3_5 | 0.209554   | 1.79045    | 0.04348    | 0.04351    |
| Aco_P14_1_3_2_4 | 0.274363   | 1.72564    | 0.04396    | 0.04396    |
| Aco_P18_3_3_4_4 | 0.229738   | 1.77026    | 0.04534    | 0.04537    |
| Aco_P18_4_3_4_3 | 1.8651     | 0.134896   | 0.00002    | 0.04606    |
| Aco_P18_2_3_6_3 | 0.292599   | 1.7074     | 0.04697    | 0.04705    |
| Aco_P20_3_3_7_3 | 0.190122   | 1.80988    | 0.04706    | 0.04718    |
| Aco_P16_1_3_5_3 | 0.436516   | 1.56348    | 0.04508    | 0.04762    |
| Aco_P16_3_2_5_2 | 0.0017378  | 1.99826    | 0.02653    | 0.04765    |
| Aco_P13_1_3_1_4 | 0.00114815 | 1.99885    | 0.04162    | 0.05013    |
| Aco_P19_4_2_4_5 | 0.0805815  | 1.91942    | 0.05041    | 0.05045    |
| Aco_P13_2_2_3_2 | 0.436516   | 1.56348    | 0.02607    | 0.05066    |

| name            | $c_l$      | $c_a$      | $\Delta_l$ | $\Delta_a$ |
|-----------------|------------|------------|------------|------------|
| Aco_P16_1_4_3_4 | 1.98302    | 0.0169824  | 0.00002    | 0.05076    |
| Aco_P15_1_4_2_4 | 1.97601    | 0.0239883  | 0.00002    | 0.05123    |
| Aco_P16_2_2_3_5 | 0.242626   | 1.75737    | 0.05207    | 0.05207    |
| Aco_P19_4_3_5_3 | 0.176002   | 1.824      | 0.05221    | 0.05225    |
| Aco_P19_3_3_5_4 | 0.340668   | 1.65933    | 0.05222    | 0.05228    |
| Aco_P15_3_2_3_3 | 0.0418308  | 1.95817    | 0.05184    | 0.05229    |
| Aco_P17_2_3_4_4 | 0.412265   | 1.58774    | 0.05324    | 0.05323    |
| Aco_P19_3_3_4_5 | 0.125921   | 1.87408    | 0.05353    | 0.05364    |
| Aco_P20_4_3_5_4 | 0.220854   | 1.77915    | 0.05577    | 0.05571    |
| Aco_P17_1_4_4_4 | 1.99308    | 0.00691831 | 0.00001    | 0.05582    |
| Aco_P13_1_2_1_5 | 0.130344   | 1.86966    | 0.05580    | 0.05589    |
| Aco_P20_2_4_4_6 | 0.269733   | 1.73027    | 0.05665    | 0.05677    |
| Aco_P13_1_2_4_2 | 0.462754   | 1.53725    | 0.05692    | 0.05692    |
| Aco_P15_2_2_5_2 | 0.22692    | 1.77308    | 0.05710    | 0.05713    |
| Aco_P17_3_2_6_2 | 0.020893   | 1.97911    | 0.05726    | 0.05715    |
| Aco_P20_5_3_5_3 | 1.99868    | 0.00131826 | 0.00000    | 0.05785    |
| Aco_P19_2_3_3_7 | 0.0831764  | 1.91682    | 0.05862    | 0.03136    |
| Aco_P15_1_3_3_4 | 0.463125   | 1.53688    | 0.05878    | 0.05880    |
| Aco_P18_2_3_5_4 | 0.53592    | 1.46408    | 0.05983    | 0.05986    |
| Aco_P20_3_3_6_4 | 0.424496   | 1.5755     | 0.06039    | 0.06038    |
| Aco_P18_4_2_4_4 | 0.0610063  | 1.93899    | 0.06110    | 0.06113    |
| Aco_P17_1_4_3_5 | 0.205076   | 1.79492    | 0.06156    | 0.06157    |
| Aco_P13_1_2_2_4 | 0.286013   | 1.71399    | 0.06165    | 0.06165    |
| Aco_P14_1_4_1_4 | 1.46297    | 0.537032   | 0.00005    | 0.06190    |
| Aco_P18_1_4_5_4 | 1          | 1          | 0.00515    | 0.06250    |
| Aco_P18_4_2_6_2 | 0.00114815 | 1.99885    | 0.03548    | 0.06257    |
| Aco_P15_1_3_2_5 | 0.191306   | 1.80869    | 0.06298    | 0.06300    |
| Aco_P14_1_3_1_5 | 0.0368419  | 1.96316    | 0.06350    | 0.06363    |
| Aco_P18_1_4_4_5 | 0.311316   | 1.68868    | 0.06365    | 0.06367    |
| Aco_P12_2_1_2_3 | 0.204174   | 1.79583    | 0.04239    | 0.06371    |
| Aco_P18_3_2_4_5 | 0.143464   | 1.85654    | 0.06426    | 0.06427    |
| Aco_P12_1_2_2_3 | 0.412218   | 1.58778    | 0.06450    | 0.06452    |
| Aco_P16_1_4_2_5 | 0.251189   | 1.74881    | 0.02738    | 0.06477    |
| Aco_P15_3_2_4_2 | 0.231376   | 1.76862    | 0.06695    | 0.06701    |
| Aco_P16_1_3_4_4 | 0.600114   | 1.39989    | 0.06735    | 0.06739    |
| Aco_P18_1_5_3_5 | 1.99737    | 0.00263027 | 0.00000    | 0.06831    |
| Aco_P19_1_4_6_4 | 1          | 1          | 0.01085    | 0.06863    |
| Aco_P19_1_4_5_5 | 0.40738    | 1.59262    | 0.06519    | 0.06863    |

| name            | $c_l$      | $c_a$      | $\Delta_l$ | $\Delta_a$ |
|-----------------|------------|------------|------------|------------|
| Aco_P19_4_2_7_2 | 0.00114815 | 1.99885    | 0.04032    | 0.06868    |
| Aco_P15_2_2_3_4 | 0.176649   | 1.82335    | 0.06908    | 0.06908    |
| Aco_P14_3_2_3_2 | 1.95831    | 0.0416869  | 0.00002    | 0.06986    |
| Aco_P19_1_5_4_5 | 1.99859    | 0.00141254 | 0.00000    | 0.07003    |
| Aco_P9_1_1_2_1  | 1.12904    | 0.870964   | 0.01384    | 0.07115    |
| Aco_P17_1_5_2_5 | 1.9951     | 0.00489779 | 0.00001    | 0.07138    |
| Aco_P19_2_3_4_6 | 0.202124   | 1.79788    | 0.07147    | 0.07150    |
| Aco_P8_1_1_1_1  | 1.99814    | 0.00186209 | 0.00000    | 0.07212    |
| Aco_P20_4_2_5_5 | 0.0841273  | 1.91587    | 0.07237    | 0.07245    |
| Aco_P15_1_4_1_5 | 0.00162181 | 1.99838    | 0.04649    | 0.07245    |
| Aco_P14_2_2_3_3 | 0.312121   | 1.68788    | 0.07351    | 0.07357    |
| Aco_P20_1_4_6_5 | 0.472107   | 1.52789    | 0.07400    | 0.07407    |
| Aco_P20_1_4_7_4 | 0.616595   | 1.3834     | 0.03297    | 0.07407    |
| Aco_P20_5_2_7_2 | 0.00141254 | 1.99859    | 0.04210    | 0.07412    |
| Aco_P20_1_5_5_5 | 1.97761    | 0.0223872  | 0.00003    | 0.07414    |
| Aco_P19_2_3_7_3 | 0.310793   | 1.68921    | 0.07447    | 0.07453    |
| Aco_P10_1_1_3_1 | 0.249478   | 1.75052    | 0.07504    | 0.07508    |
| Aco_P18_1_4_3_6 | 0.217355   | 1.78264    | 0.07540    | 0.07558    |
| Aco_P17_3_2_4_4 | 0.0942357  | 1.90576    | 0.07600    | 0.07604    |
| Aco_P15_1_3_1_6 | 0.0732461  | 1.92675    | 0.07600    | 0.07613    |
| Aco_P20_1_5_4_6 | 0.218776   | 1.78122    | 0.05201    | 0.07700    |
| Aco_P20_5_2_5_4 | 0.050529   | 1.94947    | 0.07717    | 0.07720    |
| Aco_P19_1_5_3_6 | 0.204174   | 1.79583    | 0.03873    | 0.07730    |
| Aco_P17_4_2_4_3 | 0.218776   | 1.78122    | 0.01434    | 0.07763    |
| Aco_P17_1_4_2_6 | 0.0927902  | 1.90721    | 0.07786    | 0.07794    |
| Aco_P17_1_3_6_3 | 0.39087    | 1.60913    | 0.07844    | 0.07850    |
| Aco_P16_1_3_2_6 | 0.133823   | 1.86618    | 0.07880    | 0.07897    |
| Aco_P16_3_2_4_3 | 0.319815   | 1.68018    | 0.07969    | 0.07971    |
| Aco_P14_1_2_2_5 | 0.165959   | 1.83404    | 0.08012    | 0.06545    |
| Aco_P16_1_5_1_5 | 0.331131   | 1.66887    | 0.00025    | 0.08104    |
| Aco_P18_1_5_2_6 | 1.97761    | 0.0223872  | 0.00003    | 0.08121    |
| Aco_P16_1_4_1_6 | 0.0124431  | 1.98756    | 0.08175    | 0.08199    |
| Aco_P17_4_2_5_2 | 0.224281   | 1.77572    | 0.08201    | 0.08209    |
| Aco_P20_1_6_3_6 | 1.96369    | 0.0363078  | 0.00003    | 0.08237    |
| Aco_P17_3_2_5_3 | 0.45183    | 1.54817    | 0.08378    | 0.08373    |
| Aco_P19_1_4_4_6 | 0.338876   | 1.66112    | 0.08371    | 0.08380    |
| Aco_P15_2_2_4_3 | 0.550181   | 1.44982    | 0.08419    | 0.08421    |
| Aco_P17_1_3_3_6 | 0.218066   | 1.78193    | 0.08612    | 0.08620    |

| name            | $c_l$      | $c_a$     | $\Delta_l$ | $\Delta_a$ |
|-----------------|------------|-----------|------------|------------|
| Aco_P11_2_1_3_1 | 0.00151356 | 1.99849   | 0.07955    | 0.08642    |
| Aco_P19_1_6_2_6 | 1.99573    | 0.0042658 | 0.00000    | 0.08645    |
| Aco_P20_4_2_8_2 | 0.107679   | 1.89232   | 0.08687    | 0.08690    |
| Aco_P19_4_2_5_4 | 0.0671753  | 1.93282   | 0.08696    | 0.08699    |
| Aco_P20_1_5_3_7 | 0.105676   | 1.89432   | 0.08697    | 0.08701    |
| Aco_P11_2_1_2_2 | 0.0749477  | 1.92505   | 0.08661    | 0.08703    |
| Aco_P16_1_3_1_7 | 0.101623   | 1.89838   | 0.08755    | 0.08777    |
| Aco_P16_1_3_3_5 | 0.32397    | 1.67603   | 0.08809    | 0.08806    |
| Aco_P19_5_2_6_2 | 0.169228   | 1.83077   | 0.08855    | 0.08853    |
| Aco_P16_4_2_4_2 | 1.18717    | 0.812831  | 0.00011    | 0.08884    |
| Aco_P17_1_5_1_6 | 0.00141254 | 1.99859   | 0.04825    | 0.08886    |
| Aco_P13_1_2_3_3 | 0.677452   | 1.32255   | 0.08946    | 0.08945    |
| Aco_P18_1_4_2_7 | 0.0871852  | 1.91281   | 0.08964    | 0.08975    |
| Aco_P19_1_5_2_7 | 0.0457108  | 1.95429   | 0.08975    | 0.09018    |
| Aco_P19_2_3_6_4 | 0.466818   | 1.53318   | 0.09036    | 0.09037    |
| Aco_P18_3_2_7_2 | 0.217627   | 1.78237   | 0.09043    | 0.09042    |
| Aco_P19_1_4_3_7 | 0.152589   | 1.84741   | 0.09043    | 0.09050    |
| Aco_P17_1_4_1_7 | 0.0399513  | 1.96005   | 0.09085    | 0.09118    |
| Aco_P17_1_3_2_7 | 0.113804   | 1.8862    | 0.09145    | 0.09159    |
| Aco_P19_4_2_6_3 | 0.384986   | 1.61501   | 0.09169    | 0.09179    |
| Aco_P19_5_2_5_3 | 0.467735   | 1.53226   | 0.01411    | 0.09186    |
| Aco_P17_1_3_5_4 | 0.572034   | 1.42797   | 0.09205    | 0.09202    |
| Aco_P18_2_3_4_5 | 0.301283   | 1.69872   | 0.09226    | 0.09237    |
| Aco_P20_3_3_5_5 | 0.299787   | 1.70021   | 0.09296    | 0.09294    |
| Aco_P18_4_2_5_3 | 0.284152   | 1.71585   | 0.09355    | 0.09362    |
| Aco_P20_1_6_2_7 | 0.109648   | 1.89035   | 0.02522    | 0.09382    |
| Aco_P20_1_4_4_7 | 0.229159   | 1.77084   | 0.09381    | 0.09384    |
| Aco_P11_1_1_2_3 | 0.388167   | 1.61183   | 0.09382    | 0.09394    |
| Aco_P20_1_4_5_6 | 0.44068    | 1.55932   | 0.09433    | 0.09434    |
| Aco_P16_2_2_6_2 | 0.332255   | 1.66775   | 0.09502    | 0.09502    |
| Aco_P18_1_6_1_6 | 1          | 1         | 0.00008    | 0.09540    |
| Aco_P20_2_3_8_3 | 0.316027   | 1.68397   | 0.09547    | 0.09554    |
| Aco_P18_1_5_1_7 | 0.001      | 1.999     | 0.09379    | 0.09590    |
| Aco_P17_2_2_4_5 | 0.239083   | 1.76092   | 0.09642    | 0.09652    |
| Aco_P20_1_5_2_8 | 0.0542332  | 1.94577   | 0.09862    | 0.09890    |
| Aco_P19_1_4_2_8 | 0.0827857  | 1.91721   | 0.09980    | 0.09989    |
| Aco_P18_1_4_1_8 | 0.0621015  | 1.9379    | 0.09944    | 0.09992    |

## 2.27 Aid

### 2.27.1 Near-Miss Cages

| name            | $c_l$   | $c_a$      | $\Delta_l$ | $\Delta_a$ |
|-----------------|---------|------------|------------|------------|
| Aid_P18_2_5_2_5 | 1.99475 | 0.00524807 | 0.00000    | 0.00716    |
| Aid_P16_2_4_2_4 | 1.99149 | 0.00851138 | 0.00000    | 0.00860    |
| Aid_P12_1_3_1_3 | 1       | 1          | 0.00000    | 0.01145    |
| Aid_P20_3_5_3_5 | 1.78122 | 0.218776   | 0.00000    | 0.01322    |
| Aid_P20_2_6_2_6 | 1.99698 | 0.00301995 | 0.00000    | 0.01941    |
| Aid_P18_3_4_3_4 | 1.99868 | 0.00131826 | 0.00000    | 0.02589    |
| Aid_P14_2_3_2_3 | 1.99838 | 0.00162181 | 0.00000    | 0.02962    |
| Aid_P10_1_2_1_2 | 1       | 1          | 0.00001    | 0.02974    |
| Aid_P20_4_4_4_4 | 1.9045  | 0.0954993  | 0.00001    | 0.03282    |
| Aid_P14_1_4_1_4 | 1       | 1          | 0.00003    | 0.03891    |
| Aid_P16_3_3_3_3 | 1.98712 | 0.0128825  | 0.00000    | 0.04218    |
| Aid_P18_4_3_4_3 | 1.9805  | 0.0194984  | 0.00001    | 0.05714    |
| Aid_P16_1_5_1_5 | 1       | 1          | 0.00007    | 0.05852    |
| Aid_P12_2_2_2_2 | 1.99877 | 0.00123027 | 0.00000    | 0.05904    |
| Aid_P20_5_3_5_3 | 1.97911 | 0.020893   | 0.00001    | 0.06879    |
| Aid_P18_1_6_1_6 | 1       | 1          | 0.00006    | 0.07323    |
| Aid_P20_1_7_1_7 | 1       | 1          | 0.00010    | 0.08468    |
| Aid_P14_3_2_3_2 | 1.56348 | 0.436516   | 0.00006    | 0.08517    |
| Aid_P8_1_1_1_1  | 1       | 1          | 0.00006    | 0.09839    |

## 2.28 Arcd

### 2.28.1 Regular Cages

| name             | $\theta$    | name | $\theta$ | name | $\theta$ |
|------------------|-------------|------|----------|------|----------|
| Arcd_P20_3_4_5_4 | 4.20348e-05 |      |          |      |          |



### 2.28.2 Near-Miss Cages

| name             | $c_l$      | $c_a$      | $\Delta_l$ | $\Delta_a$ | $\theta$ |
|------------------|------------|------------|------------|------------|----------|
| Arcd_P16_2_3_4_3 | 0.159036   | 1.84096    | 0.00653    | 0.00654    | 11.01790 |
| Arcd_P19_2_4_5_4 | 1.99786    | 0.00213796 | 0.00000    | 0.00748    | 29.78800 |
| Arcd_P19_2_3_5_5 | 0.21394    | 1.78606    | 0.01050    | 0.01051    | 22.34340 |
| Arcd_P17_2_3_5_3 | 0.189105   | 1.81089    | 0.01421    | 0.01424    | 37.37740 |
| Arcd_P18_2_4_4_4 | 0.131693   | 1.86831    | 0.01445    | 0.01446    | 11.73720 |
| Arcd_P20_2_4_5_5 | 0.0164647  | 1.98354    | 0.01571    | 0.01579    | 22.71650 |
| Arcd_P20_2_4_6_4 | 0.314934   | 1.68507    | 0.01596    | 0.01598    | 37.37740 |
| Arcd_P20_2_3_5_6 | 0.0381695  | 1.96183    | 0.01618    | 0.01618    | 22.53330 |
| Arcd_P17_2_3_4_4 | 0.229006   | 1.77099    | 0.01759    | 0.01761    | 21.51770 |
| Arcd_P18_2_2_5_5 | 0.272673   | 1.72733    | 0.01767    | 0.01767    | 22.05770 |
| Arcd_P18_3_3_5_3 | 0.110859   | 1.88914    | 0.02034    | 0.02037    | 0.00001  |
| Arcd_P18_2_3_5_4 | 0.222809   | 1.77719    | 0.02105    | 0.02110    | 23.44320 |
| Arcd_P20_3_3_5_5 | 0.261512   | 1.73849    | 0.02175    | 0.02176    | 23.01550 |
| Arcd_P15_2_2_4_3 | 0.0416869  | 1.95831    | 0.01717    | 0.02197    | 22.57710 |
| Arcd_P12_1_1_3_3 | 0.423201   | 1.5768     | 0.02340    | 0.02339    | 22.09230 |
| Arcd_P19_3_2_5_5 | 0.175718   | 1.82428    | 0.02356    | 0.02354    | 23.30950 |
| Arcd_P19_3_3_6_3 | 0.00186209 | 1.99814    | 0.01073    | 0.02452    | 37.37740 |
| Arcd_P13_2_2_3_2 | 0.151642   | 1.84836    | 0.02457    | 0.02460    | 0.00000  |
| Arcd_P20_3_3_6_4 | 0.0653387  | 1.93466    | 0.02490    | 0.02495    | 23.23470 |
| Arcd_P19_3_3_5_4 | 0.153026   | 1.84697    | 0.02558    | 0.02575    | 21.54490 |
| Arcd_P11_1_2_2_2 | 0.286952   | 1.71305    | 0.02574    | 0.02576    | 5.23606  |
| Arcd_P20_2_5_4_5 | 0.113369   | 1.88663    | 0.02611    | 0.02616    | 12.07500 |
| Arcd_P17_3_3_4_3 | 0.302339   | 1.69766    | 0.02660    | 0.02661    | 0.00000  |
| Arcd_P18_2_3_4_5 | 0.183807   | 1.81619    | 0.02687    | 0.02690    | 22.71880 |
| Arcd_P15_2_3_3_3 | 0.288234   | 1.71177    | 0.02758    | 0.02758    | 0.00001  |
| Arcd_P20_4_3_6_3 | 0.00107152 | 1.99893    | 0.02038    | 0.02782    | 0.00001  |
| Arcd_P19_3_4_4_4 | 0.257519   | 1.74248    | 0.02827    | 0.02830    | 0.00000  |
| Arcd_P20_3_2_6_5 | 0.0821349  | 1.91787    | 0.02944    | 0.02945    | 22.44140 |
| Arcd_P18_3_2_5_4 | 0.0735109  | 1.92649    | 0.02961    | 0.02973    | 22.83140 |
| Arcd_P17_2_2_4_5 | 0.0724436  | 1.92756    | 0.03278    | 0.00985    | 22.98910 |
| Arcd_P14_1_2_3_4 | 1.99573    | 0.0042658  | 0.00001    | 0.03368    | 22.67940 |
| Arcd_P19_2_4_4_5 | 0.129945   | 1.87006    | 0.03370    | 0.03368    | 19.59300 |
| Arcd_P19_2_3_4_6 | 0.151211   | 1.84879    | 0.03456    | 0.03453    | 23.19090 |
| Arcd_P20_2_3_6_5 | 0.269464   | 1.73054    | 0.03504    | 0.03505    | 21.89460 |
| Arcd_P9_1_1_2_1  | 0.00229087 | 1.99771    | 0.03025    | 0.03574    | 0.00000  |
| Arcd_P10_1_1_2_2 | 0.535147   | 1.46485    | 0.03586    | 0.03592    | 22.99540 |
| Arcd_P19_4_3_5_3 | 0.18529    | 1.81471    | 0.03604    | 0.03613    | 0.00000  |
| Arcd_P17_2_2_5_4 | 0.240286   | 1.75971    | 0.03621    | 0.03623    | 21.85640 |

| name             | $c_l$     | $c_a$     | $\Delta_l$ | $\Delta_a$ | $\theta$ |
|------------------|-----------|-----------|------------|------------|----------|
| Arcd_P17_3_2_5_3 | 0.0347376 | 1.96526   | 0.03879    | 0.03894    | 22.77340 |
| Arcd_P20_2_4_4_6 | 0.126945  | 1.87305   | 0.04011    | 0.04025    | 22.18110 |
| Arcd_P17_2_4_3_4 | 0.186541  | 1.81346   | 0.04048    | 0.04061    | 2.42134  |
| Arcd_P19_3_2_6_4 | 0.0810838 | 1.91892   | 0.04331    | 0.04331    | 22.34730 |
| Arcd_P15_1_3_3_4 | 0.0389045 | 1.9611    | 0.03399    | 0.04447    | 21.91230 |
| Arcd_P15_1_2_3_5 | 0.0931648 | 1.90684   | 0.04452    | 0.04454    | 22.89400 |
| Arcd_P20_4_2_6_4 | 0.056312  | 1.94369   | 0.04510    | 0.04521    | 22.92880 |
| Arcd_P20_3_3_4_6 | 0.243359  | 1.75664   | 0.04665    | 0.04664    | 24.35600 |
| Arcd_P19_3_3_4_5 | 0.290277  | 1.70972   | 0.04668    | 0.04669    | 23.57390 |
| Arcd_P15_2_2_3_4 | 0.370525  | 1.62948   | 0.04677    | 0.04676    | 23.94530 |
| Arcd_P18_2_3_6_3 | 0.292533  | 1.70747   | 0.04703    | 0.04706    | 37.37740 |
| Arcd_P20_3_3_7_3 | 0.190169  | 1.80983   | 0.04718    | 0.04718    | 37.37740 |
| Arcd_P19_2_2_6_5 | 0.269856  | 1.73014   | 0.04737    | 0.04736    | 20.90170 |
| Arcd_P20_4_4_4_4 | 0.316854  | 1.68315   | 0.04800    | 0.04801    | 0.00001  |
| Arcd_P13_2_1_3_3 | 0.331226  | 1.66877   | 0.04917    | 0.04918    | 23.86830 |
| Arcd_P17_3_2_4_4 | 0.323465  | 1.67654   | 0.04941    | 0.04944    | 24.22910 |
| Arcd_P14_2_2_3_3 | 0.379837  | 1.62016   | 0.05079    | 0.05079    | 21.91560 |
| Arcd_P16_3_2_5_2 | 0.258988  | 1.74101   | 0.05122    | 0.05195    | 52.62620 |
| Arcd_P16_1_3_4_4 | 1.98798   | 0.0120226 | 0.00004    | 0.05216    | 23.86490 |
| Arcd_P19_2_5_3_5 | 0.128718  | 1.87128   | 0.05272    | 0.05277    | 5.77065  |
| Arcd_P16_1_3_3_5 | 0.57544   | 1.42456   | 0.00898    | 0.05336    | 22.63380 |
| Arcd_P16_1_2_4_5 | 0.0798449 | 1.92016   | 0.05368    | 0.05403    | 22.25850 |
| Arcd_P16_1_4_3_4 | 0.0112202 | 1.98878   | 0.05480    | 0.05479    | 20.31040 |
| Arcd_P19_4_2_6_3 | 0.0328127 | 1.96719   | 0.05456    | 0.05487    | 23.00930 |
| Arcd_P17_4_2_5_2 | 0.001     | 1.999     | 0.03729    | 0.05560    | 0.00001  |
| Arcd_P19_2_3_6_4 | 0.225895  | 1.77411   | 0.05595    | 0.05596    | 25.27430 |
| Arcd_P20_3_4_4_5 | 0.288403  | 1.7116    | 0.05594    | 0.05629    | 7.01017  |
| Arcd_P16_3_3_3_3 | 0.414355  | 1.58564   | 0.05640    | 0.05645    | 0.00001  |
| Arcd_P17_1_4_4_4 | 1.83404   | 0.165959  | 0.00012    | 0.05697    | 29.67940 |
| Arcd_P14_2_1_4_3 | 0.154882  | 1.84512   | 0.03595    | 0.05698    | 22.51740 |
| Arcd_P18_3_3_4_4 | 0.238651  | 1.76135   | 0.05721    | 0.05718    | 17.97370 |
| Arcd_P14_1_2_4_3 | 0.393001  | 1.607     | 0.05725    | 0.05724    | 23.21290 |
| Arcd_P17_3_2_6_2 | 0.0239883 | 1.97601   | 0.05730    | 0.05734    | 37.37740 |
| Arcd_P13_1_3_2_3 | 0.30903   | 1.69097   | 0.03581    | 0.05763    | 8.23301  |
| Arcd_P17_1_3_5_4 | 0.283461  | 1.71654   | 0.05902    | 0.05903    | 25.48190 |
| Arcd_P18_3_4_3_4 | 0.265392  | 1.73461   | 0.05935    | 0.05935    | 0.00002  |
| Arcd_P20_3_5_3_5 | 0.188664  | 1.81134   | 0.05922    | 0.05952    | 0.00005  |
| Arcd_P18_3_2_6_3 | 0.0831399 | 1.91686   | 0.06079    | 0.06081    | 23.17630 |

| name             | $c_l$      | $c_a$     | $\Delta_l$ | $\Delta_a$ | $\theta$ |
|------------------|------------|-----------|------------|------------|----------|
| Arcd_P11_1_1_3_2 | 0.333056   | 1.66694   | 0.06101    | 0.06105    | 22.11810 |
| Arcd_P17_1_3_4_5 | 0.0324616  | 1.96754   | 0.06102    | 0.06109    | 22.65560 |
| Arcd_P16_2_3_3_4 | 0.235283   | 1.76472   | 0.06108    | 0.06118    | 18.53320 |
| Arcd_P17_1_3_3_6 | 0.165959   | 1.83404   | 0.03709    | 0.06137    | 22.98180 |
| Arcd_P19_4_2_5_4 | 0.22237    | 1.77763   | 0.06173    | 0.06176    | 24.19000 |
| Arcd_P17_1_4_3_5 | 0.0409772  | 1.95902   | 0.06198    | 0.06234    | 20.77570 |
| Arcd_P18_1_4_5_4 | 1          | 1         | 0.00516    | 0.06250    | 37.37740 |
| Arcd_P18_4_2_6_2 | 0.00131826 | 1.99868   | 0.04614    | 0.06255    | 0.00002  |
| Arcd_P12_2_1_3_2 | 0.0789383  | 1.92106   | 0.06321    | 0.06331    | 22.78540 |
| Arcd_P17_2_3_3_5 | 0.213468   | 1.78653   | 0.06336    | 0.06336    | 23.01830 |
| Arcd_P18_4_3_4_3 | 0.32756    | 1.67244   | 0.06346    | 0.06343    | 0.00000  |
| Arcd_P16_3_2_4_3 | 0.240433   | 1.75957   | 0.06364    | 0.06365    | 22.19310 |
| Arcd_P20_2_5_3_6 | 0.141788   | 1.85821   | 0.06374    | 0.06378    | 11.33840 |
| Arcd_P18_2_3_3_6 | 0.182022   | 1.81798   | 0.06467    | 0.06472    | 23.83210 |
| Arcd_P18_2_4_3_5 | 0.174121   | 1.82588   | 0.06511    | 0.06519    | 13.19510 |
| Arcd_P12_1_2_2_3 | 0.262327   | 1.73767   | 0.06577    | 0.06576    | 21.50510 |
| Arcd_P20_4_2_7_3 | 0.0292964  | 1.9707    | 0.06600    | 0.06598    | 23.36590 |
| Arcd_P18_1_4_4_5 | 0.00977237 | 1.99023   | 0.06660    | 0.06672    | 24.17540 |
| Arcd_P14_1_3_3_3 | 0.234423   | 1.76558   | 0.06662    | 0.06678    | 52.62630 |
| Arcd_P16_1_2_5_4 | 0.390455   | 1.60954   | 0.06739    | 0.06740    | 20.73430 |
| Arcd_P12_2_2_2_2 | 0.561647   | 1.43835   | 0.06742    | 0.06742    | 0.00000  |
| Arcd_P18_1_3_4_6 | 0.025438   | 1.97456   | 0.06812    | 0.06831    | 22.57200 |
| Arcd_P18_1_3_5_5 | 0.140918   | 1.85908   | 0.06818    | 0.06832    | 22.22710 |
| Arcd_P18_1_4_3_6 | 1.97601    | 0.0239883 | 0.00005    | 0.06838    | 22.28280 |
| Arcd_P19_4_2_7_2 | 0.001      | 1.999     | 0.04042    | 0.06867    | 37.37740 |
| Arcd_P19_5_2_6_2 | 0.00107152 | 1.99893   | 0.03795    | 0.06867    | 0.00003  |
| Arcd_P20_5_3_5_3 | 0.271036   | 1.72896   | 0.06863    | 0.06877    | 0.00001  |
| Arcd_P20_2_3_4_7 | 0.0588844  | 1.94112   | 0.06912    | 0.03503    | 23.29530 |
| Arcd_P18_2_2_6_4 | 0.280351   | 1.71965   | 0.06949    | 0.06951    | 20.90090 |
| Arcd_P20_2_4_3_7 | 0.135687   | 1.86431   | 0.06989    | 0.07001    | 23.13670 |
| Arcd_P19_2_4_3_6 | 0.150066   | 1.84993   | 0.07011    | 0.07012    | 21.77320 |
| Arcd_P20_4_3_4_5 | 0.305425   | 1.69457   | 0.07021    | 0.07026    | 24.47670 |
| Arcd_P18_1_5_3_5 | 0.0295121  | 1.97049   | 0.07074    | 0.07096    | 18.74590 |
| Arcd_P19_1_4_5_5 | 0.0881847  | 1.91182   | 0.07170    | 0.07176    | 25.96810 |
| Arcd_P18_4_2_5_3 | 0.163187   | 1.83681   | 0.07207    | 0.07209    | 22.48770 |
| Arcd_P20_3_2_7_4 | 0.185331   | 1.81467   | 0.07248    | 0.07250    | 21.35380 |
| Arcd_P19_1_5_4_5 | 0.00131826 | 1.99868   | 0.01049    | 0.07251    | 24.60150 |
| Arcd_P20_4_3_5_4 | 0.218776   | 1.78122   | 0.05820    | 0.07259    | 15.69770 |

| name             | $c_l$      | $c_a$     | $\Delta_l$ | $\Delta_a$ | $\theta$ |
|------------------|------------|-----------|------------|------------|----------|
| Arcd_P19_1_4_4_6 | 0.00762006 | 1.99238   | 0.07355    | 0.07362    | 23.15520 |
| Arcd_P20_1_4_7_4 | 0.616595   | 1.3834    | 0.03288    | 0.07407    | 37.37740 |
| Arcd_P20_5_2_7_2 | 0.00123027 | 1.99877   | 0.04197    | 0.07415    | 37.37740 |
| Arcd_P14_2_3_2_3 | 0.310337   | 1.68966   | 0.07417    | 0.07419    | 0.00002  |
| Arcd_P20_1_5_5_5 | 1.8651     | 0.134896  | 0.00014    | 0.07435    | 33.93760 |
| Arcd_P19_1_4_3_7 | 0.0954993  | 1.9045    | 0.05782    | 0.07441    | 22.66880 |
| Arcd_P18_1_3_3_7 | 0.0776247  | 1.92238   | 0.07443    | 0.06847    | 23.19550 |
| Arcd_P19_2_3_7_3 | 0.310643   | 1.68936   | 0.07455    | 0.07448    | 37.37740 |
| Arcd_P19_1_3_6_5 | 0.248847   | 1.75115   | 0.07453    | 0.07464    | 21.87880 |
| Arcd_P19_1_3_5_6 | 0.0646364  | 1.93536   | 0.07478    | 0.07479    | 22.11280 |
| Arcd_P19_3_3_3_6 | 0.237405   | 1.76259   | 0.07492    | 0.07491    | 24.96700 |
| Arcd_P11_1_1_2_3 | 0.165959   | 1.83404   | 0.07502    | 0.03512    | 23.31980 |
| Arcd_P10_1_1_3_1 | 0.249077   | 1.75092   | 0.07493    | 0.07507    | 37.37740 |
| Arcd_P13_1_2_2_4 | 0.216972   | 1.78303   | 0.07522    | 0.07537    | 23.24750 |
| Arcd_P20_1_4_6_5 | 0.19778    | 1.80222   | 0.07596    | 0.07604    | 28.29470 |
| Arcd_P19_1_5_3_6 | 0.0397519  | 1.96025   | 0.07603    | 0.07625    | 19.66030 |
| Arcd_P20_5_2_6_3 | 0.104403   | 1.8956    | 0.07691    | 0.07705    | 22.79720 |
| Arcd_P15_3_1_4_3 | 0.165959   | 1.83404   | 0.06659    | 0.07798    | 23.59830 |
| Arcd_P19_4_4_3_4 | 0.307363   | 1.69264   | 0.07807    | 0.07807    | 0.00000  |
| Arcd_P20_1_5_4_6 | 0.001      | 1.999     | 0.07361    | 0.07837    | 23.95730 |
| Arcd_P17_1_3_6_3 | 0.390358   | 1.60964   | 0.07852    | 0.07852    | 37.37740 |
| Arcd_P20_1_4_5_6 | 0.038657   | 1.96134   | 0.07901    | 0.07910    | 23.13130 |
| Arcd_P14_1_3_2_4 | 0.163857   | 1.83614   | 0.07930    | 0.07929    | 18.68470 |
| Arcd_P14_3_2_3_2 | 0.417223   | 1.58278   | 0.07938    | 0.07940    | 0.00001  |
| Arcd_P20_1_4_4_7 | 0.0103429  | 1.98966   | 0.07934    | 0.07949    | 22.77590 |
| Arcd_P13_1_1_4_3 | 0.420696   | 1.5793    | 0.07963    | 0.07963    | 20.50000 |
| Arcd_P20_1_4_3_8 | 0.068073   | 1.93193   | 0.07962    | 0.07993    | 22.99480 |
| Arcd_P15_1_4_2_4 | 1.96369    | 0.0363078 | 0.00014    | 0.08019    | 8.50625  |
| Arcd_P20_1_5_3_7 | 1.96369    | 0.0363078 | 0.00007    | 0.08025    | 21.72560 |
| Arcd_P20_1_3_5_7 | 0.036947   | 1.96305   | 0.08023    | 0.08036    | 22.30620 |
| Arcd_P20_1_3_6_6 | 0.137904   | 1.8621    | 0.08068    | 0.08075    | 21.34200 |
| Arcd_P19_3_4_3_5 | 0.339476   | 1.66052   | 0.08140    | 0.08140    | 0.00090  |
| Arcd_P18_3_3_3_5 | 0.271038   | 1.72896   | 0.08190    | 0.08190    | 23.85850 |
| Arcd_P16_3_2_3_4 | 0.382923   | 1.61708   | 0.08274    | 0.08273    | 25.46760 |
| Arcd_P11_2_1_3_1 | 0.00213796 | 1.99786   | 0.01180    | 0.08334    | 0.00003  |
| Arcd_P16_4_2_4_2 | 0.297946   | 1.70205   | 0.08498    | 0.08502    | 0.00001  |
| Arcd_P20_3_4_3_6 | 0.184055   | 1.81594   | 0.08556    | 0.08555    | 21.90340 |
| Arcd_P20_1_3_7_5 | 0.30222    | 1.69778   | 0.08617    | 0.08617    | 21.73650 |

| name             | $c_l$     | $c_a$      | $\Delta_l$ | $\Delta_a$ | $\theta$ |
|------------------|-----------|------------|------------|------------|----------|
| Arcd_P16_3_1_5_3 | 0.125893  | 1.87411    | 0.05075    | 0.08633    | 22.69060 |
| Arcd_P20_4_2_8_2 | 0.107379  | 1.89262    | 0.08669    | 0.08684    | 37.37740 |
| Arcd_P18_4_2_4_4 | 0.330871  | 1.66913    | 0.08689    | 0.08701    | 25.71110 |
| Arcd_P16_2_4_2_4 | 0.164503  | 1.8355     | 0.08806    | 0.08806    | 0.00013  |
| Arcd_P15_1_3_2_5 | 0.145478  | 1.85452    | 0.08827    | 0.08834    | 22.29490 |
| Arcd_P18_5_2_5_2 | 0.212716  | 1.78728    | 0.08887    | 0.08888    | 0.00001  |
| Arcd_P18_3_2_7_2 | 0.216939  | 1.78306    | 0.09039    | 0.09041    | 37.37740 |
| Arcd_P20_2_3_7_4 | 0.256981  | 1.74302    | 0.09048    | 0.09047    | 27.42590 |
| Arcd_P20_6_2_6_2 | 0.137197  | 1.8628     | 0.09090    | 0.09091    | 0.00001  |
| Arcd_P18_1_3_6_4 | 0.313043  | 1.68696    | 0.09120    | 0.09129    | 27.21280 |
| Arcd_P16_1_4_2_5 | 0.100214  | 1.89979    | 0.09153    | 0.09165    | 15.81530 |
| Arcd_P14_3_1_4_2 | 0.0527724 | 1.94723    | 0.09126    | 0.09170    | 22.90730 |
| Arcd_P20_5_2_5_4 | 0.282833  | 1.71717    | 0.09270    | 0.09273    | 25.73910 |
| Arcd_P20_4_3_3_6 | 0.251189  | 1.74881    | 0.09431    | 0.08497    | 26.10170 |
| Arcd_P17_4_3_3_3 | 0.389986  | 1.61001    | 0.09429    | 0.09439    | 0.00000  |
| Arcd_P14_2_2_2_4 | 0.336484  | 1.66352    | 0.09472    | 0.09477    | 24.72050 |
| Arcd_P20_2_3_8_3 | 0.316051  | 1.68395    | 0.09555    | 0.09554    | 37.37740 |
| Arcd_P17_2_4_2_5 | 0.252543  | 1.74746    | 0.09630    | 0.09637    | 4.04686  |
| Arcd_P20_5_4_3_4 | 0.329771  | 1.67023    | 0.09651    | 0.09660    | 0.00001  |
| Arcd_P17_1_5_2_5 | 1.99893   | 0.00107152 | 0.00000    | 0.09669    | 10.16190 |
| Arcd_P19_5_3_4_3 | 0.335988  | 1.66401    | 0.09705    | 0.09717    | 0.00001  |
| Arcd_P17_3_4_2_4 | 0.243446  | 1.75655    | 0.09736    | 0.09737    | 0.00001  |
| Arcd_P16_1_3_2_6 | 0.121327  | 1.87867    | 0.09785    | 0.09791    | 23.17210 |
| Arcd_P19_3_2_7_3 | 0.185805  | 1.81419    | 0.09764    | 0.09794    | 23.93170 |
| Arcd_P17_1_2_6_4 | 0.381904  | 1.6181     | 0.09917    | 0.09915    | 20.08520 |

## 2.29 Arco

### 2.29.1 Regular Cages

| name             | $\theta$    | name             | $\theta$    | name             |
|------------------|-------------|------------------|-------------|------------------|
| Arco_P8_1_1_1_1  | 2.09131e-06 | Arco_P12_2_2_2_2 | 3.5202e-06  | Arco_P20_4_4_4_4 |
| Arco_P12_1_2_3_2 | 54.7356     | Arco_P16_3_3_3_3 | 4.97831e-06 |                  |

### 2.29.2 Near-Miss Cages

| name             | $c_l$      | $c_a$      | $\Delta_l$ | $\Delta_a$ | $\theta$ |
|------------------|------------|------------|------------|------------|----------|
| Arco_P11_1_2_2_2 | 0.00123027 | 1.99877    | 0.00020    | 0.00109    | 29.41600 |
| Arco_P19_3_4_4_4 | 0.131006   | 1.86899    | 0.00430    | 0.00430    | 14.31100 |
| Arco_P15_2_3_3_3 | 0.122292   | 1.87771    | 0.00441    | 0.00442    | 19.55150 |
| Arco_P11_1_1_2_3 | 0.218776   | 1.78122    | 0.00511    | 0.00277    | 30.73440 |
| Arco_P18_2_4_4_4 | 1.99755    | 0.00245471 | 0.00000    | 0.00589    | 35.74080 |
| Arco_P19_2_4_5_4 | 1.9045     | 0.0954993  | 0.00002    | 0.00688    | 50.45550 |
| Arco_P18_2_3_4_5 | 0.186269   | 1.81373    | 0.01196    | 0.01196    | 30.90340 |
| Arco_P16_2_3_4_3 | 1.98521    | 0.0147911  | 0.00001    | 0.01439    | 44.63040 |
| Arco_P20_3_4_5_4 | 1.99737    | 0.00263027 | 0.00000    | 0.01440    | 35.85450 |
| Arco_P17_2_4_3_4 | 0.40738    | 1.59262    | 0.00357    | 0.01452    | 20.12190 |
| Arco_P19_2_4_4_5 | 1.99149    | 0.00851138 | 0.00000    | 0.01533    | 31.81300 |
| Arco_P18_4_3_4_3 | 1.92756    | 0.0724436  | 0.00001    | 0.01563    | 0.00000  |
| Arco_P20_2_4_6_4 | 0.31511    | 1.68489    | 0.01593    | 0.01597    | 54.73560 |
| Arco_P20_3_3_5_5 | 0.0650319  | 1.93497    | 0.01661    | 0.01662    | 30.87650 |
| Arco_P18_3_4_3_4 | 0.165959   | 1.83404    | 0.01584    | 0.01677    | 5.26289  |
| Arco_P19_2_3_4_6 | 0.0648589  | 1.93514    | 0.01713    | 0.01714    | 30.57510 |
| Arco_P17_2_2_4_5 | 0.266067   | 1.73393    | 0.01724    | 0.01725    | 30.16070 |
| Arco_P17_2_3_4_4 | 0.191344   | 1.80866    | 0.01976    | 0.01976    | 33.96150 |
| Arco_P12_1_2_2_3 | 0.0918326  | 1.90817    | 0.01990    | 0.01989    | 29.47140 |
| Arco_P15_2_2_3_4 | 0.292522   | 1.70748    | 0.02037    | 0.02040    | 30.59040 |
| Arco_P20_2_5_4_5 | 0.00162181 | 1.99838    | 0.00281    | 0.02150    | 31.07490 |
| Arco_P16_2_3_3_4 | 0.186624   | 1.81338    | 0.02197    | 0.02198    | 25.92020 |
| Arco_P20_2_4_4_6 | 0.0184294  | 1.98157    | 0.02214    | 0.02222    | 30.59420 |
| Arco_P20_3_4_4_5 | 0.218758   | 1.78124    | 0.02289    | 0.02288    | 20.93080 |
| Arco_P20_2_3_4_7 | 0.0632505  | 1.93675    | 0.02337    | 0.02337    | 30.67010 |
| Arco_P20_3_3_4_6 | 0.241296   | 1.7587     | 0.02435    | 0.02438    | 30.96290 |
| Arco_P19_3_3_6_3 | 0.00245471 | 1.99755    | 0.01038    | 0.02451    | 54.73560 |
| Arco_P14_2_2_3_3 | 0.109648   | 1.89035    | 0.02205    | 0.02598    | 29.40710 |
| Arco_P17_3_3_4_3 | 0.184315   | 1.81569    | 0.02715    | 0.02715    | 9.23018  |
| Arco_P14_3_2_3_2 | 1.97761    | 0.0223872  | 0.00000    | 0.02778    | 0.00000  |
| Arco_P20_5_3_5_3 | 1.79583    | 0.204174   | 0.00002    | 0.02779    | 0.00001  |
| Arco_P19_3_3_4_5 | 0.196498   | 1.8035     | 0.02824    | 0.02826    | 29.41840 |
| Arco_P19_2_5_3_5 | 1.92238    | 0.0776247  | 0.00006    | 0.02844    | 20.19110 |
| Arco_P19_3_3_5_4 | 0.0584307  | 1.94157    | 0.02851    | 0.02853    | 34.11430 |
| Arco_P19_4_4_3_4 | 0.267909   | 1.73209    | 0.02903    | 0.02908    | 0.00001  |
| Arco_P14_2_3_2_3 | 0.660693   | 1.33931    | 0.00724    | 0.02925    | 5.76676  |
| Arco_P10_1_1_2_2 | 0.0849328  | 1.91507    | 0.02952    | 0.02956    | 30.76850 |
| Arco_P20_2_3_5_6 | 0.244676   | 1.75532    | 0.02964    | 0.02972    | 30.25800 |

| name             | $c_l$      | $c_a$      | $\Delta_l$ | $\Delta_a$ | $\theta$ |
|------------------|------------|------------|------------|------------|----------|
| Arco_P20_3_5_3_5 | 1.99023    | 0.00977237 | 0.00001    | 0.02972    | 7.60606  |
| Arco_P18_3_2_4_5 | 0.19235    | 1.80765    | 0.02996    | 0.03003    | 31.50310 |
| Arco_P20_2_4_5_5 | 0.268265   | 1.73174    | 0.03017    | 0.03017    | 40.01910 |
| Arco_P14_1_3_3_3 | 1.9805     | 0.0194984  | 0.00001    | 0.03110    | 43.15930 |
| Arco_P18_2_4_3_5 | 0.131612   | 1.86839    | 0.03171    | 0.03171    | 24.02720 |
| Arco_P18_3_3_5_3 | 0.30903    | 1.69097    | 0.01577    | 0.03181    | 48.43690 |
| Arco_P19_3_2_5_5 | 0.0831764  | 1.91682    | 0.03033    | 0.03192    | 30.53580 |
| Arco_P18_3_3_4_4 | 0.115325   | 1.88467    | 0.03237    | 0.03240    | 24.30760 |
| Arco_P17_2_3_3_5 | 0.16362    | 1.83638    | 0.03326    | 0.03332    | 29.25420 |
| Arco_P13_1_3_2_3 | 0.001      | 1.999      | 0.03136    | 0.03492    | 27.43960 |
| Arco_P16_2_2_4_4 | 0.195719   | 1.80428    | 0.03585    | 0.03587    | 30.62260 |
| Arco_P20_2_5_3_6 | 0.102329   | 1.89767    | 0.03450    | 0.03613    | 23.25910 |
| Arco_P17_3_2_4_4 | 0.102285   | 1.89771    | 0.03665    | 0.03672    | 30.73440 |
| Arco_P14_2_2_4_2 | 0.00301995 | 1.99698    | 0.01636    | 0.03704    | 54.73560 |
| Arco_P13_2_2_3_2 | 1.99023    | 0.00977237 | 0.00001    | 0.03785    | 25.98170 |
| Arco_P13_1_2_2_4 | 0.117954   | 1.88205    | 0.03776    | 0.03785    | 30.19900 |
| Arco_P15_1_3_4_3 | 1          | 1          | 0.00505    | 0.03846    | 54.73560 |
| Arco_P17_4_3_3_3 | 0.336927   | 1.66307    | 0.03907    | 0.03913    | 0.00000  |
| Arco_P18_2_3_3_6 | 0.142405   | 1.8576     | 0.04037    | 0.04037    | 30.48210 |
| Arco_P19_2_4_3_6 | 0.109983   | 1.89002    | 0.04135    | 0.04142    | 27.66690 |
| Arco_P19_4_3_5_3 | 0.196941   | 1.80306    | 0.04212    | 0.04222    | 1.84688  |
| Arco_P15_3_3_2_3 | 0.333761   | 1.66624    | 0.04324    | 0.04324    | 0.00001  |
| Arco_P20_4_3_6_3 | 0.17021    | 1.82979    | 0.04332    | 0.04331    | 54.10990 |
| Arco_P20_4_2_5_5 | 0.0932544  | 1.90675    | 0.04338    | 0.04338    | 31.43430 |
| Arco_P14_1_2_3_4 | 0.225696   | 1.7743     | 0.04371    | 0.04381    | 30.76770 |
| Arco_P16_3_2_4_3 | 0.050942   | 1.94906    | 0.04390    | 0.04402    | 30.21850 |
| Arco_P19_2_3_5_5 | 0.218238   | 1.78176    | 0.04410    | 0.04410    | 32.38240 |
| Arco_P18_3_2_5_4 | 0.0614256  | 1.93857    | 0.04437    | 0.04454    | 30.90600 |
| Arco_P19_5_3_4_3 | 0.226259   | 1.77374    | 0.04456    | 0.04460    | 0.00000  |
| Arco_P16_2_2_3_5 | 0.0954993  | 1.9045     | 0.04496    | 0.01745    | 31.00580 |
| Arco_P19_3_4_3_5 | 0.302943   | 1.69706    | 0.04605    | 0.04615    | 10.38430 |
| Arco_P20_2_4_3_7 | 0.102792   | 1.89721    | 0.04685    | 0.04688    | 29.38350 |
| Arco_P18_2_3_6_3 | 0.292672   | 1.70733    | 0.04702    | 0.04705    | 54.73560 |
| Arco_P20_3_3_7_3 | 0.190117   | 1.80988    | 0.04717    | 0.04717    | 54.73560 |
| Arco_P14_1_3_2_4 | 0.0672995  | 1.9327     | 0.04706    | 0.04720    | 27.66840 |
| Arco_P16_1_3_5_3 | 0.409869   | 1.59013    | 0.04755    | 0.04762    | 54.73560 |
| Arco_P16_4_2_4_2 | 0.0275423  | 1.97246    | 0.00043    | 0.04762    | 0.00001  |
| Arco_P16_3_2_5_2 | 0.0017378  | 1.99826    | 0.02780    | 0.04765    | 54.73560 |

| name             | $c_l$      | $c_a$      | $\Delta_l$ | $\Delta_a$ | $\theta$ |
|------------------|------------|------------|------------|------------|----------|
| Arco_P20_5_4_3_4 | 0.321119   | 1.67888    | 0.04833    | 0.04835    | 0.00000  |
| Arco_P13_1_2_3_3 | 0.328202   | 1.6718     | 0.04855    | 0.04859    | 35.46080 |
| Arco_P15_1_3_3_4 | 1.91087    | 0.0891251  | 0.00024    | 0.04903    | 34.48980 |
| Arco_P16_2_4_2_4 | 1.99543    | 0.00457088 | 0.00001    | 0.05020    | 9.41558  |
| Arco_P20_4_3_5_4 | 0.181718   | 1.81828    | 0.05049    | 0.05047    | 13.39290 |
| Arco_P19_4_2_5_4 | 0.0677077  | 1.93229    | 0.05128    | 0.05134    | 30.97840 |
| Arco_P13_2_1_3_3 | 0.177828   | 1.82217    | 0.03153    | 0.05202    | 30.93140 |
| Arco_P14_1_2_2_5 | 0.133265   | 1.86673    | 0.05298    | 0.05311    | 30.82860 |
| Arco_P18_2_2_5_5 | 0.270418   | 1.72958    | 0.05405    | 0.05402    | 28.94620 |
| Arco_P15_1_2_3_5 | 0.0781783  | 1.92182    | 0.05558    | 0.05568    | 30.57450 |
| Arco_P16_1_4_3_4 | 1.97911    | 0.020893   | 0.00001    | 0.05621    | 36.10680 |
| Arco_P15_1_3_2_5 | 0.100225   | 1.89977    | 0.05615    | 0.05633    | 29.11290 |
| Arco_P15_2_2_4_3 | 0.129884   | 1.87012    | 0.05631    | 0.05635    | 35.19410 |
| Arco_P17_1_4_4_4 | 1.96612    | 0.0338844  | 0.00003    | 0.05639    | 48.81930 |
| Arco_P17_3_4_2_4 | 0.119101   | 1.8809     | 0.05636    | 0.05643    | 0.22613  |
| Arco_P13_1_2_4_2 | 0.462364   | 1.53764    | 0.05687    | 0.05689    | 54.73560 |
| Arco_P15_2_2_5_2 | 0.22691    | 1.77309    | 0.05715    | 0.05713    | 54.73560 |
| Arco_P17_3_2_6_2 | 0.0236243  | 1.97638    | 0.05678    | 0.05732    | 54.73560 |
| Arco_P20_4_4_3_5 | 0.406597   | 1.5934     | 0.05757    | 0.05760    | 0.00100  |
| Arco_P15_1_4_2_4 | 0.00638805 | 1.99361    | 0.05825    | 0.05858    | 26.91000 |
| Arco_P18_4_2_5_3 | 0.04074    | 1.95926    | 0.05842    | 0.05860    | 31.37820 |
| Arco_P19_3_3_3_6 | 0.214884   | 1.78512    | 0.05868    | 0.05873    | 31.03710 |
| Arco_P19_4_3_4_4 | 0.402165   | 1.59784    | 0.05918    | 0.05913    | 0.24399  |
| Arco_P20_4_2_6_4 | 0.0519983  | 1.948      | 0.05936    | 0.05937    | 31.13000 |
| Arco_P18_3_3_3_5 | 0.241629   | 1.75837    | 0.05943    | 0.05950    | 27.52520 |
| Arco_P17_3_3_3_4 | 0.393782   | 1.60622    | 0.06014    | 0.06015    | 6.90998  |
| Arco_P17_2_4_2_5 | 0.203641   | 1.79636    | 0.06115    | 0.06128    | 15.42380 |
| Arco_P13_3_2_2_2 | 0.453113   | 1.54689    | 0.06139    | 0.06139    | 0.00000  |
| Arco_P16_1_3_3_5 | 0.0526953  | 1.9473     | 0.06170    | 0.06191    | 31.58490 |
| Arco_P20_3_4_3_6 | 0.173856   | 1.82614    | 0.06197    | 0.06198    | 23.86910 |
| Arco_P20_3_2_6_5 | 0.169395   | 1.83061    | 0.06215    | 0.06226    | 29.30490 |
| Arco_P18_1_4_5_4 | 1          | 1          | 0.00515    | 0.06250    | 54.73560 |
| Arco_P10_2_1_2_1 | 1.99868    | 0.00131826 | 0.00000    | 0.06250    | 0.00000  |
| Arco_P18_5_2_5_2 | 1.98521    | 0.0147911  | 0.00001    | 0.06250    | 0.00000  |
| Arco_P18_4_2_6_2 | 0.00107152 | 1.99893    | 0.03727    | 0.06255    | 54.73560 |
| Arco_P18_2_3_5_4 | 0.329409   | 1.67059    | 0.06287    | 0.06285    | 44.96550 |
| Arco_P16_1_3_4_4 | 0.358876   | 1.64112    | 0.06361    | 0.06364    | 42.53880 |
| Arco_P10_1_2_1_2 | 1.99543    | 0.00457088 | 0.00003    | 0.06406    | 7.17512  |



| name             | $c_l$      | $c_a$      | $\Delta_l$ | $\Delta_a$ | $\theta$ |
|------------------|------------|------------|------------|------------|----------|
| Arco_P18_4_4_2_4 | 0.244361   | 1.75564    | 0.06473    | 0.06474    | 0.00000  |
| Arco_P20_3_3_6_4 | 0.30017    | 1.69983    | 0.06550    | 0.06556    | 48.63910 |
| Arco_P20_4_3_4_5 | 0.193887   | 1.80611    | 0.06567    | 0.06570    | 27.71020 |
| Arco_P18_2_5_2_5 | 1.99206    | 0.00794328 | 0.00002    | 0.06608    | 12.34630 |
| Arco_P15_3_2_4_2 | 0.267609   | 1.73239    | 0.06602    | 0.06629    | 1.27374  |
| Arco_P15_2_3_2_4 | 0.313531   | 1.68647    | 0.06656    | 0.06649    | 14.41840 |
| Arco_P17_1_4_3_5 | 0.00899943 | 1.991      | 0.06703    | 0.06704    | 33.32520 |
| Arco_P16_1_3_2_6 | 0.109952   | 1.89005    | 0.06703    | 0.06747    | 30.05670 |
| Arco_P19_2_3_3_7 | 0.0724436  | 1.92756    | 0.06753    | 0.04110    | 30.91110 |
| Arco_P18_1_4_4_5 | 0.120125   | 1.87988    | 0.06762    | 0.06781    | 40.00790 |
| Arco_P12_1_1_3_3 | 0.438577   | 1.56142    | 0.06797    | 0.06800    | 28.94980 |
| Arco_P16_1_4_2_5 | 0.0371879  | 1.96281    | 0.06803    | 0.06805    | 26.68080 |
| Arco_P17_1_3_4_5 | 0.160402   | 1.8396     | 0.06794    | 0.06812    | 32.94260 |
| Arco_P15_4_2_3_2 | 0.293668   | 1.70633    | 0.06817    | 0.06821    | 0.00000  |
| Arco_P19_1_4_6_4 | 1          | 1          | 0.01083    | 0.06863    | 54.73560 |
| Arco_P19_4_2_7_2 | 0.00107152 | 1.99893    | 0.04157    | 0.06866    | 54.73560 |
| Arco_P9_1_1_2_1  | 1.33931    | 0.660693   | 0.00743    | 0.06954    | 46.40160 |
| Arco_P19_1_4_5_5 | 0.297573   | 1.70243    | 0.06955    | 0.06956    | 48.49310 |
| Arco_P19_3_5_2_5 | 1.49881    | 0.501187   | 0.00145    | 0.06966    | 1.80665  |
| Arco_P16_4_3_2_3 | 0.407016   | 1.59298    | 0.07024    | 0.07026    | 0.00001  |
| Arco_P18_3_4_2_5 | 0.338408   | 1.66159    | 0.07030    | 0.07030    | 2.92464  |
| Arco_P17_4_2_5_2 | 0.155365   | 1.84463    | 0.07104    | 0.07102    | 0.00001  |
| Arco_P17_5_2_4_2 | 0.155649   | 1.84435    | 0.07103    | 0.07113    | 0.00000  |
| Arco_P16_3_2_3_4 | 0.293868   | 1.70613    | 0.07108    | 0.07114    | 30.95670 |
| Arco_P17_1_3_3_6 | 0.0440183  | 1.95598    | 0.07123    | 0.07126    | 30.98020 |
| Arco_P14_2_2_2_4 | 0.310077   | 1.68992    | 0.07157    | 0.07164    | 30.31150 |
| Arco_P19_1_5_4_5 | 1.99838    | 0.00162181 | 0.00000    | 0.07224    | 42.41680 |
| Arco_P19_6_2_5_2 | 0.047863   | 1.95214    | 0.07333    | 0.07331    | 0.00001  |
| Arco_P19_5_2_6_2 | 0.0492667  | 1.95073    | 0.07342    | 0.07346    | 0.00000  |
| Arco_P20_5_2_6_3 | 0.0588844  | 1.94112    | 0.05602    | 0.07355    | 32.44130 |
| Arco_P15_1_2_4_4 | 0.355156   | 1.64484    | 0.07362    | 0.07366    | 30.86130 |
| Arco_P20_1_4_6_5 | 0.47219    | 1.52781    | 0.07402    | 0.07407    | 54.73500 |
| Arco_P20_1_4_7_4 | 0.616595   | 1.3834     | 0.03300    | 0.07407    | 54.73560 |
| Arco_P20_6_2_6_2 | 1.95214    | 0.047863   | 0.00001    | 0.07408    | 0.00001  |
| Arco_P20_5_2_7_2 | 0.00114815 | 1.99885    | 0.04092    | 0.07412    | 54.73560 |
| Arco_P18_1_5_3_5 | 0.001      | 1.999      | 0.00802    | 0.07412    | 33.02080 |
| Arco_P17_1_4_2_6 | 1.998      | 0.00199526 | 0.00001    | 0.07418    | 28.44590 |
| Arco_P20_1_5_5_5 | 1.91682    | 0.0831764  | 0.00009    | 0.07426    | 51.91080 |

| name             | $c_l$     | $c_a$     | $\Delta_l$ | $\Delta_a$ | $\theta$ |
|------------------|-----------|-----------|------------|------------|----------|
| Arco_P19_2_5_2_6 | 0.0954997 | 1.9045    | 0.07424    | 0.07433    | 16.51520 |
| Arco_P18_5_3_3_3 | 0.34065   | 1.65935   | 0.07443    | 0.07443    | 0.00000  |
| Arco_P17_3_2_5_3 | 0.0954993 | 1.9045    | 0.07311    | 0.07445    | 37.79320 |
| Arco_P19_2_3_7_3 | 0.31076   | 1.68924   | 0.07449    | 0.07453    | 54.73560 |
| Arco_P10_1_1_3_1 | 0.248758  | 1.75124   | 0.07507    | 0.07507    | 54.73560 |
| Arco_P20_4_5_2_5 | 0.11635   | 1.88365   | 0.07504    | 0.07525    | 0.00002  |
| Arco_P20_6_3_4_3 | 0.278043  | 1.72196   | 0.07561    | 0.07563    | 0.00000  |
| Arco_P20_3_5_2_6 | 0.167942  | 1.83206   | 0.07578    | 0.07582    | 6.46031  |
| Arco_P18_1_4_3_6 | 0.0158502 | 1.98415   | 0.07585    | 0.07586    | 31.91610 |
| Arco_P17_1_5_2_5 | 0.0109854 | 1.98901   | 0.07592    | 0.07600    | 26.46060 |
| Arco_P20_4_3_3_6 | 0.251892  | 1.74811   | 0.07652    | 0.07660    | 31.73560 |
| Arco_P19_5_4_2_4 | 0.311279  | 1.68872   | 0.07674    | 0.07686    | 0.00001  |
| Arco_P12_2_1_3_2 | 0.0687438 | 1.93126   | 0.07687    | 0.07694    | 31.05340 |
| Arco_P18_2_4_2_6 | 0.153975  | 1.84602   | 0.07699    | 0.07710    | 23.72250 |
| Arco_P18_1_3_4_6 | 0.0840249 | 1.91598   | 0.07781    | 0.07795    | 31.14370 |
| Arco_P16_2_3_2_5 | 0.176529  | 1.82347   | 0.07804    | 0.07803    | 26.69220 |
| Arco_P20_2_6_2_6 | 1.96612   | 0.0338844 | 0.00005    | 0.07844    | 14.35910 |
| Arco_P17_1_3_6_3 | 0.390961  | 1.60904   | 0.07844    | 0.07851    | 54.73560 |
| Arco_P20_2_3_6_5 | 0.221166  | 1.77883   | 0.07896    | 0.07902    | 34.01890 |
| Arco_P18_1_3_3_7 | 0.0464389 | 1.95356   | 0.07920    | 0.07924    | 30.85980 |
| Arco_P17_2_2_5_4 | 0.242855  | 1.75715   | 0.07946    | 0.07949    | 30.63580 |
| Arco_P19_1_4_4_6 | 0.0745079 | 1.92549   | 0.07953    | 0.07965    | 34.01050 |
| Arco_P18_4_2_4_4 | 0.208289  | 1.79171   | 0.07967    | 0.07970    | 31.18930 |
| Arco_P17_2_3_2_6 | 0.15672   | 1.84328   | 0.07990    | 0.08005    | 29.95130 |
| Arco_P18_1_4_2_7 | 0.0818362 | 1.91816   | 0.08047    | 0.08053    | 29.09120 |
| Arco_P19_1_5_3_6 | 0.001     | 1.999     | 0.06551    | 0.08081    | 32.51370 |
| Arco_P20_1_5_4_6 | 0.0282647 | 1.97174   | 0.08097    | 0.08108    | 37.70150 |
| Arco_P18_1_3_5_5 | 0.263991  | 1.73601   | 0.08142    | 0.08148    | 34.38700 |
| Arco_P19_3_2_6_4 | 0.160654  | 1.83935   | 0.08234    | 0.08235    | 30.85860 |
| Arco_P19_4_4_2_5 | 0.393836  | 1.60616   | 0.08276    | 0.08276    | 0.00057  |
| Arco_P20_1_4_5_6 | 0.151259  | 1.84874   | 0.08261    | 0.08283    | 36.18610 |
| Arco_P16_3_3_2_4 | 0.52062   | 1.47938   | 0.08299    | 0.08298    | 0.00129  |
| Arco_P18_1_5_2_6 | 0.0216821 | 1.97832   | 0.08313    | 0.08313    | 26.31600 |
| Arco_P19_1_4_3_7 | 0.0191776 | 1.98082   | 0.08299    | 0.08323    | 31.25360 |
| Arco_P11_2_2_1_2 | 0.660693  | 1.33931   | 0.05503    | 0.08333    | 0.00000  |
| Arco_P20_2_5_2_7 | 0.110556  | 1.88944   | 0.08369    | 0.08384    | 21.57490 |
| Arco_P14_2_1_4_3 | 0.154882  | 1.84512   | 0.08294    | 0.08419    | 29.98180 |
| Arco_P19_1_3_5_6 | 0.159966  | 1.84003   | 0.08402    | 0.08422    | 30.88520 |

| name             | $c_l$      | $c_a$      | $\Delta_l$ | $\Delta_a$ | $\theta$ |
|------------------|------------|------------|------------|------------|----------|
| Arco_P20_5_2_5_4 | 0.151092   | 1.84891    | 0.08508    | 0.08509    | 31.33290 |
| Arco_P19_2_4_2_7 | 0.113587   | 1.88641    | 0.08525    | 0.08533    | 27.64500 |
| Arco_P19_1_3_4_7 | 0.0613092  | 1.93869    | 0.08531    | 0.08546    | 30.73150 |
| Arco_P17_1_3_2_7 | 0.102329   | 1.89767    | 0.08575    | 0.07701    | 30.65040 |
| Arco_P13_2_2_2_3 | 0.406891   | 1.59311    | 0.08575    | 0.08581    | 14.44510 |
| Arco_P11_2_1_3_1 | 0.00301995 | 1.99698    | 0.07701    | 0.08642    | 54.73560 |
| Arco_P20_1_6_3_6 | 0.00107152 | 1.99893    | 0.03652    | 0.08656    | 32.12780 |
| Arco_P18_4_3_3_4 | 0.426514   | 1.57349    | 0.08673    | 0.08676    | 0.00012  |
| Arco_P20_4_2_8_2 | 0.10715    | 1.89285    | 0.08680    | 0.08684    | 54.73560 |
| Arco_P20_1_5_3_7 | 0.00464808 | 1.99535    | 0.08673    | 0.08714    | 31.87730 |
| Arco_P15_3_1_4_3 | 0.144544   | 1.85546    | 0.05321    | 0.08727    | 31.13310 |
| Arco_P20_1_4_4_7 | 0.0516056  | 1.94839    | 0.08767    | 0.08771    | 32.15300 |
| Arco_P19_1_5_2_7 | 1.99438    | 0.00562341 | 0.00001    | 0.08804    | 27.60480 |
| Arco_P19_1_4_2_8 | 0.0871127  | 1.91289    | 0.08802    | 0.08821    | 29.86790 |
| Arco_P19_1_6_2_6 | 0.0111281  | 1.98887    | 0.08814    | 0.08911    | 26.25110 |
| Arco_P20_1_3_6_6 | 0.231712   | 1.76829    | 0.08882    | 0.08952    | 30.80150 |
| Arco_P20_1_4_3_8 | 0.0291006  | 1.9709     | 0.08971    | 0.08978    | 30.94060 |
| Arco_P20_5_3_4_4 | 0.35378    | 1.64622    | 0.09021    | 0.09024    | 0.00020  |
| Arco_P19_2_3_6_4 | 0.466821   | 1.53318    | 0.09036    | 0.09039    | 54.73560 |
| Arco_P18_3_2_7_2 | 0.217211   | 1.78279    | 0.09023    | 0.09041    | 54.73560 |
| Arco_P15_3_2_3_3 | 0.496145   | 1.50385    | 0.09066    | 0.09067    | 1.41729  |
| Arco_P9_1_1_1_2  | 0.605039   | 1.39496    | 0.09123    | 0.09122    | 27.82860 |
| Arco_P20_1_5_2_8 | 1.98415    | 0.0158489  | 0.00003    | 0.09258    | 28.94900 |
| Arco_P17_1_3_5_4 | 0.546493   | 1.45351    | 0.09303    | 0.09303    | 53.69760 |
| Arco_P20_2_4_2_8 | 0.0937943  | 1.90621    | 0.09320    | 0.09327    | 29.36220 |
| Arco_P14_3_1_3_3 | 0.230536   | 1.76946    | 0.09361    | 0.09373    | 32.55270 |
| Arco_P20_3_4_2_7 | 0.14031    | 1.85969    | 0.09385    | 0.09398    | 27.02820 |
| Arco_P20_1_6_2_7 | 0.0136719  | 1.98633    | 0.09438    | 0.09453    | 26.23960 |
| Arco_P16_2_2_6_2 | 0.332514   | 1.66749    | 0.09503    | 0.09500    | 54.73560 |
| Arco_P19_4_2_6_3 | 0.204174   | 1.79583    | 0.05689    | 0.09529    | 41.00440 |
| Arco_P20_2_3_8_3 | 0.316479   | 1.68352    | 0.09555    | 0.09558    | 54.73560 |
| Arco_P20_6_4_2_4 | 0.32339    | 1.67661    | 0.09661    | 0.09657    | 0.00001  |
| Arco_P18_3_3_2_6 | 0.193587   | 1.80641    | 0.09662    | 0.09675    | 30.44560 |
| Arco_P19_3_4_2_6 | 0.220888   | 1.77911    | 0.09682    | 0.09687    | 19.00130 |
| Arco_P19_4_3_3_5 | 0.225252   | 1.77475    | 0.09715    | 0.09712    | 24.88780 |
| Arco_P17_4_2_4_3 | 0.407703   | 1.5923     | 0.09753    | 0.09766    | 0.00063  |
| Arco_P11_1_2_1_3 | 0.295952   | 1.70405    | 0.09976    | 0.09973    | 19.91890 |



## 2.30 Asc

### 2.30.1 Near-Miss Cages

| name              | $c_l$     | $c_a$    | $\Delta_l$ | $\Delta_a$ | $\theta$ |
|-------------------|-----------|----------|------------|------------|----------|
| Asc_P11_2_1_1_1_1 | 0.269153  | 1.73085  | 0.00499    | 0.00273    | 31.83770 |
| Asc_P20_4_3_2_3_3 | 0.0639476 | 1.93605  | 0.02322    | 0.02334    | 32.05240 |
| Asc_P17_4_2_2_2_2 | 1.14905   | 0.850946 | 0.02697    | 0.02699    | 30.01880 |
| Asc_P19_5_2_3_2_2 | 0.758578  | 1.24142  | 0.02932    | 0.03330    | 30.42100 |
| Asc_P18_4_2_3_2_2 | 0.96142   | 1.03858  | 0.03461    | 0.03462    | 33.75060 |
| Asc_P16_3_2_2_2_2 | 1.11255   | 0.887452 | 0.03510    | 0.03507    | 34.35290 |
| Asc_P20_5_2_4_2_2 | 0.666633  | 1.33337  | 0.04289    | 0.04292    | 33.10530 |
| Asc_P13_3_1_2_1_1 | 0.0953942 | 1.90461  | 0.05042    | 0.05042    | 31.57960 |
| Asc_P19_3_3_2_3_3 | 0.889786  | 1.11021  | 0.05177    | 0.05185    | 35.91990 |
| Asc_P14_2_2_1_2_2 | 0.822429  | 1.17757  | 0.05575    | 0.05577    | 34.25340 |
| Asc_P15_3_2_1_2_2 | 0.0797657 | 1.92023  | 0.05613    | 0.05613    | 31.66210 |
| Asc_P19_3_3_3_2_3 | 0.229199  | 1.7708   | 0.06737    | 0.06740    | 32.80530 |
| Asc_P20_3_3_2_3_4 | 0.606176  | 1.39382  | 0.06950    | 0.06950    | 33.85890 |
| Asc_P20_3_3_4_2_3 | 0.25314   | 1.74686  | 0.07226    | 0.07232    | 34.20360 |
| Asc_P20_5_3_2_3_2 | 0.51489   | 1.48511  | 0.07309    | 0.07309    | 31.05380 |
| Asc_P20_3_4_2_3_3 | 0.870605  | 1.12939  | 0.07735    | 0.07737    | 33.49420 |
| Asc_P20_6_2_3_2_2 | 0.812813  | 1.18719  | 0.07847    | 0.07851    | 28.40560 |
| Asc_P18_4_3_1_3_2 | 0.40738   | 1.59262  | 0.07531    | 0.07865    | 31.53550 |
| Asc_P20_5_2_2_3_3 | 0.524561  | 1.47544  | 0.07893    | 0.07896    | 31.06790 |
| Asc_P18_3_3_1_3_3 | 0.0429912 | 1.95701  | 0.07867    | 0.07957    | 32.36600 |
| Asc_P20_4_2_3_3_3 | 0.616594  | 1.38341  | 0.08058    | 0.08057    | 35.78290 |
| Asc_P17_2_3_2_2_3 | 0.113784  | 1.88622  | 0.08081    | 0.08104    | 32.33970 |
| Asc_P20_3_3_3_3_3 | 0.864783  | 1.13522  | 0.08231    | 0.08238    | 38.87110 |
| Asc_P20_4_3_3_2_3 | 0.815048  | 1.18495  | 0.08255    | 0.08259    | 30.85030 |
| Asc_P19_3_4_1_3_3 | 1.56348   | 0.436516 | 0.01077    | 0.08366    | 31.73370 |
| Asc_P17_2_3_1_3_3 | 0.594492  | 1.40551  | 0.08456    | 0.08468    | 35.60670 |
| Asc_P15_4_1_3_1_1 | 0.0771194 | 1.92288  | 0.08520    | 0.08555    | 31.49620 |
| Asc_P19_4_2_2_3_3 | 0.569702  | 1.4303   | 0.08553    | 0.08566    | 33.86540 |
| Asc_P19_5_3_1_3_2 | 0.175219  | 1.82478  | 0.08608    | 0.08610    | 30.52120 |
| Asc_P19_4_3_1_3_3 | 0.0550583 | 1.94494  | 0.08626    | 0.08636    | 31.65290 |
| Asc_P18_5_2_2_2_2 | 0.968535  | 1.03147  | 0.08679    | 0.08679    | 27.87680 |
| Asc_P14_4_1_2_1_1 | 0.134896  | 1.8651   | 0.08732    | 0.07956    | 30.55320 |
| Asc_P18_2_3_3_2_3 | 0.20259   | 1.79741  | 0.08830    | 0.08841    | 33.87100 |
| Asc_P18_2_4_1_3_3 | 0.587482  | 1.41252  | 0.08856    | 0.08857    | 33.69060 |
| Asc_P19_2_4_1_3_4 | 0.30903   | 1.69097  | 0.05887    | 0.08907    | 32.71490 |
| Asc_P20_4_3_1_4_3 | 1.18717   | 0.812831 | 0.04074    | 0.09002    | 36.55210 |
| Asc_P20_4_4_1_3_3 | 1.3834    | 0.616595 | 0.05809    | 0.09048    | 30.65940 |
| Asc_P19_4_2_4_2_2 | 0.991196  | 1.0088   | 0.09123    | 0.09123    | 37.66840 |

| name              | $c_l$     | $c_a$    | $\Delta_l$ | $\Delta_a$ | $\theta$ |
|-------------------|-----------|----------|------------|------------|----------|
| Asc_P18_3_3_2_2_3 | 0.817748  | 1.18225  | 0.09168    | 0.09170    | 30.47280 |
| Asc_P18_2_3_1_3_4 | 0.63666   | 1.36334  | 0.09212    | 0.09212    | 35.18780 |
| Asc_P18_4_2_2_3_2 | 1.04929   | 0.950714 | 0.09214    | 0.09210    | 36.55500 |
| Asc_P19_3_3_1_3_4 | 0.676608  | 1.32339  | 0.09211    | 0.09214    | 32.44490 |
| Asc_P20_6_3_1_3_2 | 0.870964  | 1.12904  | 0.07550    | 0.09358    | 28.61230 |
| Asc_P16_4_2_1_2_2 | 1.17904   | 0.820958 | 0.09379    | 0.09378    | 27.60740 |
| Asc_P20_3_4_1_3_4 | 0.707946  | 1.29205  | 0.09449    | 0.09452    | 30.44170 |
| Asc_P20_2_5_1_3_4 | 0.307166  | 1.69283  | 0.09460    | 0.09468    | 31.79250 |
| Asc_P15_2_2_2_2_2 | 0.986283  | 1.01372  | 0.09472    | 0.09472    | 38.22200 |
| Asc_P17_3_3_2_2_2 | 0.916804  | 1.0832   | 0.09487    | 0.09483    | 32.24030 |
| Asc_P14_3_1_3_1_1 | 0.251189  | 1.74881  | 0.09500    | 0.08969    | 33.27550 |
| Asc_P20_3_4_1_4_3 | 0.670222  | 1.32978  | 0.09498    | 0.09500    | 36.36230 |
| Asc_P16_3_3_1_2_2 | 0.978625  | 1.02137  | 0.09540    | 0.09539    | 30.94200 |
| Asc_P19_5_2_2_3_2 | 0.502629  | 1.49737  | 0.09541    | 0.09540    | 30.47310 |
| Asc_P20_2_4_2_3_4 | 0.0722622 | 1.92774  | 0.09497    | 0.09542    | 32.76290 |
| Asc_P17_3_2_3_2_2 | 1.00213   | 0.99787  | 0.09547    | 0.09541    | 38.13170 |
| Asc_P18_4_2_1_3_3 | 0.552585  | 1.44742  | 0.09553    | 0.09556    | 32.44080 |
| Asc_P19_2_3_3_2_4 | 0.372579  | 1.62742  | 0.09582    | 0.09585    | 33.65220 |
| Asc_P19_3_3_1_4_3 | 0.784468  | 1.21553  | 0.09618    | 0.09626    | 38.34720 |
| Asc_P19_2_3_2_3_4 | 0.463064  | 1.53694  | 0.09648    | 0.09655    | 36.07830 |
| Asc_P19_4_2_3_2_3 | 0.723554  | 1.27645  | 0.09696    | 0.09693    | 31.71030 |
| Asc_P20_5_3_1_3_3 | 0.848286  | 1.15171  | 0.09705    | 0.09706    | 28.57830 |
| Asc_P12_2_1_2_1_1 | 0.380189  | 1.61981  | 0.09777    | 0.06117    | 34.02280 |
| Asc_P12_3_1_1_1_1 | 0.218776  | 1.78122  | 0.09789    | 0.04364    | 30.24210 |
| Asc_P20_3_5_1_3_3 | 0.607715  | 1.39228  | 0.09842    | 0.09845    | 31.74710 |
| Asc_P18_3_2_2_3_3 | 0.652979  | 1.34702  | 0.09872    | 0.09872    | 36.72800 |
| Asc_P15_2_3_1_2_2 | 0.856473  | 1.14353  | 0.09916    | 0.09917    | 32.60580 |
| Asc_P16_2_3_1_2_3 | 0.731713  | 1.26829  | 0.09916    | 0.09917    | 30.84100 |
| Asc_P17_4_2_1_3_2 | 0.580354  | 1.41965  | 0.09923    | 0.09933    | 31.38280 |
| Asc_P18_2_3_2_3_3 | 0.75442   | 1.24558  | 0.09926    | 0.09945    | 38.50630 |
| Asc_P17_3_2_2_2_3 | 0.832564  | 1.16744  | 0.09955    | 0.09962    | 31.76410 |

## 2.31 Asd

### 2.31.1 Near-Miss Cages

| name              | $c_l$     | $c_a$    | $\Delta_l$ | $\Delta_a$ | $\theta$ |
|-------------------|-----------|----------|------------|------------|----------|
| Asd_P12_3_1_1_1_1 | 1.65633   | 0.343675 | 0.03074    | 0.03078    | 21.72200 |
| Asd_P15_3_2_1_2_2 | 0.331181  | 1.66882  | 0.04288    | 0.04387    | 24.85990 |
| Asd_P17_4_2_2_2_2 | 1.24142   | 0.758578 | 0.04695    | 0.04679    | 23.59830 |
| Asd_P16_4_2_1_2_2 | 1         | 1        | 0.03598    | 0.05405    | 23.37100 |
| Asd_P11_2_1_1_1_1 | 1.18717   | 0.812831 | 0.05973    | 0.05929    | 25.68710 |
| Asd_P14_4_1_2_1_1 | 0.288403  | 1.7116   | 0.06087    | 0.06109    | 24.34010 |
| Asd_P16_3_2_2_2_2 | 1.00717   | 0.99283  | 0.06740    | 0.07012    | 26.52370 |
| Asd_P13_3_1_2_1_1 | 0.0363078 | 1.96369  | 0.09479    | 0.04749    | 23.22860 |
| Asd_P14_2_2_1_2_2 | 1         | 1        | 0.09030    | 0.09566    | 26.71860 |
| Asd_P16_2_3_1_2_3 | 0.11749   | 1.88251  | 0.09427    | 0.09721    | 24.03100 |

## 3 Comparison Between General p-cages and Symmetric Ones

The tables in this section compare the p-cages obtained in [[1]] from a full relaxation, to the symmetric p-cages that we have obtained here. We have split them in several categories. The *Missing* section lists p-cages obtained in [[1]] but for which the minimal deformation exceeds the 10% threshold. The *New* section list symmetric p-cages that were missed in [[1]]. This is mostly because the minimisation procedure for non symmetric p-cages failed to generate the best configurations for these geometries. The *Comparison* section compares the two types of p-cages found. The relative deformation is defined as

$$\Delta_{def} = 2 \max\left(\frac{\Delta_{l,sym} - \Delta_{l,gen}}{\Delta_{l,sym} + \Delta_{l,gen}}, \frac{\Delta_{a,sym} - \Delta_{a,gen}}{\Delta_{a,sym} + \Delta_{a,gen}}\right) \quad (1)$$

where the subscripts *sym* and *gen* refer respectively to the deformations of the symmetric and the general p-cages. A positive value of  $\Delta_{def}$  implies that the symmetric p-cage is more deformed than the general p-cage, as one would expect. For most p-cages,  $\Delta_{def}$  is quite small, resulting from numerical inaccuracies, and implying that the symmetric p-cage is effectively as little deformed as possible. There are a few cases where  $\Delta_{def}$  is negative and not small. This happens when the general relaxation method found a configuration which was different but less regular than the symmetric one.

Three regular p-cages were missed out from [[1]]: sp\_P16\_3\_5\_5, hp\_P18\_5\_5\_5 and 8p\_P16\_5\_4\_4. There are all flat p-cages.

Most of the symmetric p-cages are very similar to the most general p-cages but there are differences. Some general p-cages have faces that are not identical and have a smaller deformation than the symmetric one.

### 3.1 tp

#### 3.1.1 New

| Name         | Symmetric  |            |
|--------------|------------|------------|
|              | $\Delta_l$ | $\Delta_a$ |
| tp_P14_7_2_2 | 0.07295    | 0.07300    |
| tp_P9_4_1_1  | 0.07715    | 0.07719    |
| tp_P16_1_4_8 | 0.09032    | 0.09040    |
| tp_P14_1_3_7 | 0.09446    | 0.09449    |



### 3.1.2 Comparison

| Name         | $\Delta_{def}$ | Symmetric  |            | General    |            |
|--------------|----------------|------------|------------|------------|------------|
|              |                | $\Delta_l$ | $\Delta_a$ | $\Delta_l$ | $\Delta_a$ |
| tp_P17_3_5_6 | 0.00102        | 0.00120    | 0.00120    | 0.00120    | 0.00120    |
| tp_P17_3_4_7 | -0.00211       | 0.00246    | 0.00246    | 0.00247    | 0.00247    |
| tp_P13_2_3_5 | -0.00043       | 0.00445    | 0.00446    | 0.00446    | 0.00446    |
| tp_P14_2_4_5 | 0.00063        | 0.00688    | 0.00688    | 0.00688    | 0.00688    |
| tp_P9_1_2_3  | 0.00229        | 0.00865    | 0.00865    | 0.00863    | 0.00863    |
| tp_P12_2_3_4 | 0.00150        | 0.00952    | 0.00952    | 0.00951    | 0.00951    |
| tp_P16_3_4_6 | 0.00029        | 0.00963    | 0.00964    | 0.00963    | 0.00964    |
| tp_P15_3_4_5 | 0.00049        | 0.01259    | 0.01260    | 0.01259    | 0.01259    |
| tp_P16_2_5_6 | -0.00002       | 0.01438    | 0.01438    | 0.01438    | 0.01438    |
| tp_P15_3_3_6 | 0.00110        | 0.02089    | 0.02089    | 0.02087    | 0.02087    |
| tp_P15_2_4_6 | 0.00155        | 0.02101    | 0.02101    | 0.02098    | 0.02100    |
| tp_P14_2_3_6 | 0.00031        | 0.02292    | 0.02294    | 0.02292    | 0.02293    |
| tp_P17_8_3_3 | -0.42687       | 0.02573    | 0.02576    | 0.03974    | 0.03974    |
| tp_P16_4_4_5 | 0.00025        | 0.02584    | 0.02585    | 0.02584    | 0.02584    |
| tp_P14_1_5_5 | 1.73321        | 0.02771    | 0.02778    | 0.00198    | 0.02973    |
| tp_P17_2_5_7 | 0.01261        | 0.02935    | 0.02940    | 0.02898    | 0.02903    |
| tp_P11_1_3_4 | 0.00042        | 0.03093    | 0.03093    | 0.03092    | 0.03092    |
| tp_P11_2_2_4 | 0.00298        | 0.03355    | 0.03354    | 0.03345    | 0.03346    |
| tp_P17_5_4_5 | 0.00019        | 0.03434    | 0.03435    | 0.03434    | 0.03434    |
| tp_P16_2_4_7 | 0.01659        | 0.03527    | 0.03527    | 0.03483    | 0.03469    |
| tp_P13_3_3_4 | 0.00151        | 0.03533    | 0.03535    | 0.03531    | 0.03530    |
| tp_P13_1_4_5 | 0.02868        | 0.03609    | 0.03609    | 0.03507    | 0.03508    |
| tp_P17_4_4_6 | 0.00034        | 0.03636    | 0.03642    | 0.03641    | 0.03641    |
| tp_P15_1_5_6 | 1.93134        | 0.03836    | 0.03847    | 0.00067    | 0.04109    |
| tp_P10_1_2_4 | 0.00222        | 0.03927    | 0.03931    | 0.03922    | 0.03922    |
| tp_P14_3_3_5 | 0.00145        | 0.04082    | 0.04082    | 0.04076    | 0.04076    |
| tp_P13_6_2_2 | -0.41109       | 0.04091    | 0.04093    | 0.06211    | 0.06211    |
| tp_P15_2_3_7 | 0.01630        | 0.04137    | 0.04144    | 0.04075    | 0.04077    |
| tp_P16_1_6_6 | -0.05450       | 0.04746    | 0.04762    | 0.05028    | 0.05029    |
| tp_P17_2_4_8 | 0.00474        | 0.04781    | 0.04790    | 0.04790    | 0.04767    |
| tp_P14_4_3_4 | 0.00066        | 0.04957    | 0.04955    | 0.04954    | 0.04954    |
| tp_P10_2_2_3 | 0.00280        | 0.04961    | 0.04966    | 0.04952    | 0.04952    |
| tp_P17_4_3_7 | 0.01540        | 0.00238    | 0.05253    | 0.00398    | 0.05173    |
| tp_P17_1_6_7 | -0.12820       | 0.05554    | 0.05556    | 0.06483    | 0.06317    |
| tp_P16_1_5_7 | 1.26027        | 0.05580    | 0.05587    | 0.01266    | 0.06126    |

| Name         | $\Delta_{def}$ | Symmetric  |            | General    |            |
|--------------|----------------|------------|------------|------------|------------|
|              |                | $\Delta_l$ | $\Delta_a$ | $\Delta_l$ | $\Delta_a$ |
| tp_P7_1_1_2  | 0.00833        | 0.05759    | 0.05763    | 0.05715    | 0.05715    |
| tp_P12_1_3_5 | 0.00073        | 0.05768    | 0.05773    | 0.05770    | 0.05769    |
| tp_P15_5_3_4 | 0.00083        | 0.05795    | 0.05795    | 0.05791    | 0.05790    |
| tp_P16_6_3_4 | 0.00026        | 0.06329    | 0.06326    | 0.06327    | 0.06327    |
| tp_P14_1_4_6 | 0.06946        | 0.06332    | 0.06331    | 0.05907    | 0.05913    |
| tp_P16_4_3_6 | 0.00105        | 0.06511    | 0.06513    | 0.06505    | 0.06506    |
| tp_P17_7_3_4 | 0.00004        | 0.06671    | 0.06671    | 0.06672    | 0.06671    |
| tp_P11_1_2_5 | 0.00512        | 0.06943    | 0.06942    | 0.06908    | 0.06909    |
| tp_P17_1_5_8 | 1.01222        | 0.07508    | 0.07508    | 0.02462    | 0.07534    |
| tp_P15_4_3_5 | 0.00108        | 0.07657    | 0.07662    | 0.07654    | 0.07654    |
| tp_P11_3_2_3 | 0.00137        | 0.07707    | 0.07711    | 0.07700    | 0.07700    |
| tp_P13_1_3_6 | 0.00031        | 0.07758    | 0.07761    | 0.07760    | 0.07759    |
| tp_P15_1_4_7 | 0.05042        | 0.07916    | 0.07918    | 0.07527    | 0.07550    |
| tp_P12_4_2_3 | 0.00088        | 0.08897    | 0.08896    | 0.08889    | 0.08890    |
| tp_P13_5_2_3 | 0.00089        | 0.09390    | 0.09389    | 0.09384    | 0.09381    |
| tp_P16_5_3_5 | 0.00097        | 0.09829    | 0.09833    | 0.09824    | 0.09823    |

## 3.2 sp

### 3.2.1 Missing

| Name         | General    |            |
|--------------|------------|------------|
|              | $\Delta_l$ | $\Delta_a$ |
| sp_P12_2_2_5 | 0.09999    | 0.10000    |
| sp_P16_2_4_7 | 0.09747    | 0.09727    |

### 3.2.2 New

| Name         | Symmetric  |            |
|--------------|------------|------------|
|              | $\Delta_l$ | $\Delta_a$ |
| sp_P14_7_2_2 | 0.07303    | 0.07302    |
| sp_P9_4_1_1  | 0.07711    | 0.07718    |

### 3.2.3 Comparison

| Name         | $\Delta_{def}$ | Symmetric  |            | General    |            |
|--------------|----------------|------------|------------|------------|------------|
|              |                | $\Delta_l$ | $\Delta_a$ | $\Delta_l$ | $\Delta_a$ |
| sp_P15_4_3_5 | -0.00027       | 0.00419    | 0.00419    | 0.00419    | 0.00419    |
| sp_P17_5_4_5 | -0.00044       | 0.00665    | 0.00665    | 0.00665    | 0.00665    |
| sp_P17_5_3_6 | 0.00053        | 0.00761    | 0.00760    | 0.00761    | 0.00760    |
| sp_P16_4_4_5 | 0.00098        | 0.00801    | 0.00802    | 0.00802    | 0.00801    |
| sp_P12_3_2_4 | 0.00236        | 0.00814    | 0.00815    | 0.00813    | 0.00813    |
| sp_P14_4_2_5 | 0.07166        | 0.00518    | 0.00885    | 0.00482    | 0.00904    |
| sp_P14_4_3_4 | 0.00141        | 0.01145    | 0.01145    | 0.01143    | 0.01144    |
| sp_P13_3_3_4 | 0.00144        | 0.01400    | 0.01400    | 0.01398    | 0.01398    |
| sp_P13_2_4_4 | -0.00124       | 0.01563    | 0.01565    | 0.01565    | 0.01689    |
| sp_P9_2_1_3  | -0.00288       | 0.01992    | 0.01992    | 0.01998    | 0.01998    |
| sp_P11_3_2_3 | 0.00310        | 0.02128    | 0.02129    | 0.02122    | 0.02122    |
| sp_P17_4_4_6 | -0.00072       | 0.02439    | 0.02439    | 0.02441    | 0.02441    |
| sp_P16_4_3_6 | 0.00032        | 0.02456    | 0.02455    | 0.02455    | 0.02455    |
| sp_P15_3_4_5 | 0.00011        | 0.02500    | 0.02501    | 0.02500    | 0.02501    |
| sp_P17_8_3_3 | -0.49602       | 0.02574    | 0.02575    | 0.04274    | 0.04274    |
| sp_P10_2_2_3 | 0.00316        | 0.02616    | 0.02619    | 0.02611    | 0.02611    |
| sp_P17_3_5_6 | -0.01756       | 0.02696    | 0.02699    | 0.02744    | 0.02748    |
| sp_P16_5_3_5 | 0.00141        | 0.02871    | 0.02874    | 0.02870    | 0.02870    |
| sp_P15_5_3_4 | 0.00168        | 0.03291    | 0.03292    | 0.03287    | 0.03286    |
| sp_P14_3_3_5 | 0.00109        | 0.03811    | 0.03810    | 0.03807    | 0.03807    |
| sp_P15_2_5_5 | -0.14079       | 0.03928    | 0.03931    | 0.04524    | 0.04526    |
| sp_P8_2_1_2  | 0.00773        | 0.03979    | 0.03983    | 0.03952    | 0.03952    |
| sp_P13_6_2_2 | -0.50373       | 0.04092    | 0.04092    | 0.06865    | 0.06847    |
| sp_P13_3_2_5 | 0.00938        | 0.04182    | 0.04184    | 0.04146    | 0.04145    |
| sp_P14_2_4_5 | 0.01074        | 0.04309    | 0.04309    | 0.04263    | 0.04266    |
| sp_P12_2_3_4 | 0.00212        | 0.04399    | 0.04405    | 0.04397    | 0.04396    |
| sp_P13_4_2_4 | 0.00188        | 0.04417    | 0.04417    | 0.04409    | 0.04409    |
| sp_P17_4_3_7 | 0.01398        | 0.04542    | 0.04543    | 0.04483    | 0.04480    |
| sp_P16_2_5_6 | -0.12386       | 0.04868    | 0.04876    | 0.05511    | 0.05528    |
| sp_P16_3_4_6 | 0.00064        | 0.05106    | 0.05113    | 0.05110    | 0.05110    |
| sp_P16_6_3_4 | 0.00312        | 0.05166    | 0.05166    | 0.05150    | 0.05158    |
| sp_P15_5_2_5 | 0.01123        | 0.04319    | 0.05423    | 0.04271    | 0.05440    |
| sp_P17_2_6_6 | -0.11481       | 0.05619    | 0.05645    | 0.06324    | 0.06333    |
| sp_P17_6_3_5 | 0.00090        | 0.05980    | 0.05985    | 0.05985    | 0.05980    |
| sp_P7_1_1_2  | 0.00710        | 0.06096    | 0.06101    | 0.06058    | 0.06058    |

| Name         | $\Delta_{def}$ | Symmetric  |            | General    |            |
|--------------|----------------|------------|------------|------------|------------|
|              |                | $\Delta_l$ | $\Delta_a$ | $\Delta_l$ | $\Delta_a$ |
| sp_P12_4_2_3 | 0.00311        | 0.06170    | 0.06169    | 0.06151    | 0.06151    |
| sp_P10_1_3_3 | 0.13933        | 0.06247    | 0.06250    | 0.05433    | 0.06389    |
| sp_P15_3_3_6 | 0.00091        | 0.06251    | 0.06262    | 0.06257    | 0.06256    |
| sp_P11_2_2_4 | 0.00137        | 0.06439    | 0.06438    | 0.06430    | 0.06430    |
| sp_P10_3_1_3 | 0.03693        | 0.06039    | 0.06535    | 0.05820    | 0.06657    |
| sp_P17_2_5_7 | 0.00038        | 0.06645    | 0.06648    | 0.06644    | 0.06645    |
| sp_P17_7_3_4 | 0.00124        | 0.06650    | 0.06651    | 0.06642    | 0.06662    |
| sp_P17_3_4_7 | 0.01250        | 0.07323    | 0.07326    | 0.07237    | 0.07235    |
| sp_P15_2_4_6 | 0.01849        | 0.07502    | 0.07510    | 0.07373    | 0.07372    |
| sp_P9_1_2_3  | 0.02630        | 0.08207    | 0.08207    | 0.07994    | 0.07994    |
| sp_P11_1_3_4 | -0.11399       | 0.08329    | 0.08334    | 0.09341    | 0.09341    |
| sp_P13_2_3_5 | 0.00583        | 0.08346    | 0.08351    | 0.08304    | 0.08302    |
| sp_P16_3_3_7 | 0.04343        | 0.08542    | 0.08543    | 0.08179    | 0.08238    |
| sp_P16_6_2_5 | 0.00087        | 0.08992    | 0.08997    | 0.08988    | 0.08989    |
| sp_P13_5_2_3 | 0.00214        | 0.09182    | 0.09186    | 0.09166    | 0.09166    |
| sp_P14_5_2_4 | 0.00173        | 0.09408    | 0.09409    | 0.09392    | 0.09393    |

### 3.3 pp

#### 3.3.1 Missing

| Name         | General    |            |
|--------------|------------|------------|
|              | $\Delta_l$ | $\Delta_a$ |
| pp_P17_3_4_7 | 0.09950    | 0.09954    |

#### 3.3.2 New

| Name         | Symmetric  |            |
|--------------|------------|------------|
|              | $\Delta_l$ | $\Delta_a$ |
| pp_P14_7_2_2 | 0.07293    | 0.07301    |
| pp_P9_4_1_1  | 0.07718    | 0.07718    |
| pp_P16_2_5_6 | 0.08787    | 0.08795    |
| pp_P17_2_6_6 | 0.09524    | 0.09526    |
| pp_P17_2_5_7 | 0.09602    | 0.09605    |
| pp_P15_2_4_6 | 0.09670    | 0.09662    |
| pp_P14_6_2_3 | 0.09921    | 0.09928    |

### 3.3.3 Comparison

| Name         | $\Delta_{def}$ | Symmetric  |            | General    |            |
|--------------|----------------|------------|------------|------------|------------|
|              |                | $\Delta_l$ | $\Delta_a$ | $\Delta_l$ | $\Delta_a$ |
| pp_P17_4_5_5 | -0.92991       | 0.00416    | 0.00416    | 0.01139    | 0.01139    |
| pp_P15_5_3_4 | 0.00226        | 0.00641    | 0.00642    | 0.00640    | 0.00641    |
| pp_P13_4_2_4 | 0.00159        | 0.00957    | 0.00956    | 0.00955    | 0.00955    |
| pp_P14_3_4_4 | -0.26433       | 0.01159    | 0.01162    | 0.01512    | 0.01521    |
| pp_P16_5_3_5 | 0.00173        | 0.01325    | 0.01330    | 0.01328    | 0.01328    |
| pp_P17_5_4_5 | 0.00138        | 0.01339    | 0.01339    | 0.01337    | 0.01338    |
| pp_P17_6_3_5 | -0.00169       | 0.01652    | 0.01653    | 0.01655    | 0.01656    |
| pp_P14_4_3_4 | 0.00149        | 0.01702    | 0.01701    | 0.01699    | 0.01699    |
| pp_P8_2_1_2  | 0.00597        | 0.01916    | 0.01916    | 0.01905    | 0.01905    |
| pp_P11_3_2_3 | 0.00328        | 0.02000    | 0.02002    | 0.01995    | 0.01995    |
| pp_P12_4_2_3 | 0.00292        | 0.02272    | 0.02274    | 0.02267    | 0.02267    |
| pp_P17_8_3_3 | -0.46206       | 0.02571    | 0.02575    | 0.04121    | 0.04122    |
| pp_P11_2_3_3 | -0.24403       | 0.02624    | 0.02625    | 0.03355    | 0.03354    |
| pp_P16_4_4_5 | -0.00041       | 0.02729    | 0.02732    | 0.02733    | 0.02733    |
| pp_P16_6_3_4 | 0.00218        | 0.02965    | 0.02967    | 0.02961    | 0.02961    |
| pp_P16_3_5_5 | -0.20463       | 0.03457    | 0.03458    | 0.04255    | 0.04246    |
| pp_P17_5_3_6 | 0.00020        | 0.03475    | 0.03477    | 0.03479    | 0.03476    |
| pp_P14_5_2_4 | 0.00158        | 0.03624    | 0.03625    | 0.03619    | 0.03619    |
| pp_P16_6_2_5 | 0.00115        | 0.03772    | 0.03773    | 0.03770    | 0.03769    |
| pp_P13_6_2_2 | -0.42133       | 0.04090    | 0.04092    | 0.06273    | 0.06279    |
| pp_P13_3_3_4 | 0.00100        | 0.04104    | 0.04106    | 0.04104    | 0.04102    |
| pp_P15_3_4_5 | 0.00062        | 0.04210    | 0.04214    | 0.04207    | 0.04216    |
| pp_P14_4_2_5 | -0.04382       | 0.04241    | 0.04245    | 0.04435    | 0.04435    |
| pp_P15_4_3_5 | -0.00085       | 0.04269    | 0.04283    | 0.04287    | 0.04287    |
| pp_P17_3_5_6 | -0.16267       | 0.04895    | 0.04900    | 0.05770    | 0.05768    |
| pp_P17_7_3_4 | -0.00382       | 0.05285    | 0.05285    | 0.05305    | 0.05313    |
| pp_P17_4_4_6 | 0.01238        | 0.05540    | 0.05548    | 0.05481    | 0.05480    |
| pp_P13_2_4_4 | -0.19236       | 0.05575    | 0.05682    | 0.06854    | 0.06891    |
| pp_P12_3_2_4 | 0.00167        | 0.05945    | 0.05944    | 0.05935    | 0.05935    |
| pp_P12_2_3_4 | -0.04751       | 0.06423    | 0.06425    | 0.06736    | 0.06829    |
| pp_P13_5_2_3 | 0.00280        | 0.06540    | 0.06545    | 0.06528    | 0.06527    |
| pp_P9_3_1_2  | 0.00574        | 0.06584    | 0.06583    | 0.06546    | 0.06546    |
| pp_P11_4_1_3 | 0.00260        | 0.06657    | 0.06661    | 0.06644    | 0.06644    |
| pp_P8_1_2_2  | -0.18909       | 0.06653    | 0.06667    | 0.08059    | 0.08059    |
| pp_P10_2_2_3 | 0.00127        | 0.06787    | 0.06791    | 0.06783    | 0.06782    |

| Name         | $\Delta_{def}$ | Symmetric  |            | General    |            |
|--------------|----------------|------------|------------|------------|------------|
|              |                | $\Delta_l$ | $\Delta_a$ | $\Delta_l$ | $\Delta_a$ |
| pp_P16_4_3_6 | -0.00011       | 0.06866    | 0.06866    | 0.06868    | 0.06867    |
| pp_P17_7_2_5 | 0.00049        | 0.06912    | 0.06915    | 0.06914    | 0.06912    |
| pp_P14_2_4_5 | -0.13759       | 0.07263    | 0.07268    | 0.08336    | 0.08377    |
| pp_P16_3_4_6 | 0.02756        | 0.07491    | 0.07489    | 0.07287    | 0.07322    |
| pp_P15_6_2_4 | 0.00115        | 0.07824    | 0.07823    | 0.07815    | 0.07815    |
| pp_P15_2_5_5 | 1.43610        | 0.07897    | 0.07911    | 0.01296    | 0.09161    |
| pp_P14_3_3_5 | 0.00115        | 0.08055    | 0.08058    | 0.08050    | 0.08049    |
| pp_P9_2_1_3  | 0.01349        | 0.08565    | 0.08566    | 0.08451    | 0.08451    |
| pp_P17_4_3_7 | 0.04834        | 0.09327    | 0.09343    | 0.08911    | 0.08902    |
| pp_P13_3_2_5 | 0.01486        | 0.09671    | 0.09675    | 0.09532    | 0.09532    |

### 3.4 hp

#### 3.4.1 Missing

| Name         | General    |            |
|--------------|------------|------------|
|              | $\Delta_l$ | $\Delta_a$ |
| hp_P16_4_3_6 | 0.09422    | 0.09481    |

#### 3.4.2 New

| Name         | Symmetric  |            |
|--------------|------------|------------|
|              | $\Delta_l$ | $\Delta_a$ |
| hp_P14_4_2_5 | 0.07284    | 0.07279    |
| hp_P14_7_2_2 | 0.07297    | 0.07302    |
| hp_P9_4_1_1  | 0.07714    | 0.07716    |
| hp_P13_2_4_4 | 0.08430    | 0.08470    |
| hp_P12_2_3_4 | 0.08681    | 0.08679    |
| hp_P14_2_4_5 | 0.09717    | 0.09723    |

### 3.4.3 Comparison

| Name         | $\Delta_{def}$ | Symmetric  |            | General    |            |
|--------------|----------------|------------|------------|------------|------------|
|              |                | $\Delta_l$ | $\Delta_a$ | $\Delta_l$ | $\Delta_a$ |
| hp_P14_5_2_4 | 0.00261        | 0.00398    | 0.00398    | 0.00398    | 0.00397    |
| hp_P12_4_2_3 | 0.00433        | 0.00403    | 0.00403    | 0.00401    | 0.00401    |
| hp_P16_6_2_5 | 0.00141        | 0.00895    | 0.00896    | 0.00895    | 0.00895    |
| hp_P17_6_3_5 | -0.00263       | 0.00927    | 0.00930    | 0.00932    | 0.00932    |
| hp_P16_6_3_4 | 0.00253        | 0.01122    | 0.01122    | 0.01120    | 0.01119    |
| hp_P15_5_3_4 | 0.00220        | 0.01259    | 0.01259    | 0.01256    | 0.01256    |
| hp_P17_5_4_5 | -0.00239       | 0.02560    | 0.02561    | 0.02567    | 0.02567    |
| hp_P17_8_3_3 | -0.45542       | 0.02574    | 0.02576    | 0.04103    | 0.04095    |
| hp_P9_3_1_2  | 0.00636        | 0.02730    | 0.02730    | 0.02713    | 0.02713    |
| hp_P17_4_5_5 | -0.25871       | 0.02810    | 0.02811    | 0.03649    | 0.03646    |
| hp_P15_5_2_5 | 0.01179        | 0.03151    | 0.02584    | 0.04262    | 0.02554    |
| hp_P11_4_1_3 | 0.00223        | 0.03244    | 0.03243    | 0.03237    | 0.03237    |
| hp_P14_4_3_4 | 0.00119        | 0.03484    | 0.03484    | 0.03480    | 0.03480    |
| hp_P16_5_3_5 | 0.00081        | 0.03695    | 0.03695    | 0.03696    | 0.03692    |
| hp_P17_7_3_4 | -0.00936       | 0.03710    | 0.03710    | 0.03746    | 0.03745    |
| hp_P16_4_4_5 | 0.03123        | 0.03767    | 0.03770    | 0.03651    | 0.03662    |
| hp_P10_3_1_3 | 0.00876        | 0.03785    | 0.03465    | 0.04731    | 0.03435    |
| hp_P14_3_4_4 | -0.25744       | 0.03968    | 0.03970    | 0.05140    | 0.05145    |
| hp_P13_4_2_4 | 0.00239        | 0.04003    | 0.04004    | 0.03994    | 0.03994    |
| hp_P13_5_2_3 | 0.00211        | 0.04009    | 0.04012    | 0.04004    | 0.04004    |
| hp_P13_6_2_2 | -0.41646       | 0.04093    | 0.04094    | 0.06252    | 0.06247    |
| hp_P17_7_2_5 | 0.00037        | 0.04116    | 0.04119    | 0.04119    | 0.04117    |
| hp_P15_6_2_4 | 0.00139        | 0.04510    | 0.04512    | 0.04506    | 0.04506    |
| hp_P11_3_2_3 | 0.00265        | 0.04836    | 0.04840    | 0.04826    | 0.04827    |
| hp_P13_3_3_4 | 0.01949        | 0.05367    | 0.05375    | 0.05273    | 0.05271    |
| hp_P8_2_1_2  | 0.00795        | 0.05764    | 0.05766    | 0.05720    | 0.05720    |
| hp_P16_3_5_5 | -0.19159       | 0.05897    | 0.05896    | 0.07146    | 0.07159    |
| hp_P11_2_3_3 | -0.24567       | 0.05965    | 0.05974    | 0.07647    | 0.07647    |
| hp_P15_3_4_5 | -0.22689       | 0.05992    | 0.05992    | 0.07525    | 0.07527    |
| hp_P17_5_3_6 | 0.00067        | 0.06191    | 0.06194    | 0.06192    | 0.06190    |
| hp_P17_4_4_6 | 0.05337        | 0.06984    | 0.06983    | 0.06621    | 0.06658    |
| hp_P17_3_5_6 | -0.18091       | 0.07067    | 0.07082    | 0.08473    | 0.08503    |
| hp_P15_4_3_5 | 0.00049        | 0.07086    | 0.07085    | 0.07083    | 0.07082    |
| hp_P16_7_2_4 | -0.00498       | 0.07843    | 0.07839    | 0.07882    | 0.07882    |
| hp_P14_6_2_3 | -0.01495       | 0.07995    | 0.07992    | 0.08115    | 0.08113    |

| Name         | $\Delta_{def}$ | Symmetric  |            | General    |            |
|--------------|----------------|------------|------------|------------|------------|
|              |                | $\Delta_l$ | $\Delta_a$ | $\Delta_l$ | $\Delta_a$ |
| hp_P10_2_2_3 | 0.02180        | 0.08193    | 0.08197    | 0.08020    | 0.08020    |
| hp_P12_5_1_3 | 0.00144        | 0.08248    | 0.08246    | 0.08236    | 0.08235    |
| hp_P16_3_4_6 | -0.04212       | 0.08969    | 0.08980    | 0.09355    | 0.09547    |
| hp_P12_3_2_4 | 0.00235        | 0.09480    | 0.09488    | 0.09466    | 0.09466    |
| hp_P14_3_3_5 | 0.05173        | 0.09762    | 0.09765    | 0.09270    | 0.09452    |

### 3.5 7p

#### 3.5.1 New

| Name         | Symmetric  |            |
|--------------|------------|------------|
|              | $\Delta_l$ | $\Delta_a$ |
| 7p_P6_1_1_1  | 0.04071    | 0.04071    |
| 7p_P17_4_5_5 | 0.04586    | 0.04586    |
| 7p_P14_7_2_2 | 0.07302    | 0.07301    |
| 7p_P9_4_1_1  | 0.07712    | 0.07717    |
| 7p_P15_3_4_5 | 0.07891    | 0.07893    |
| 7p_P17_4_4_6 | 0.08034    | 0.08044    |
| 7p_P11_2_3_3 | 0.08480    | 0.08481    |
| 7p_P17_3_5_6 | 0.08726    | 0.08745    |
| 7p_P10_2_2_3 | 0.09525    | 0.09528    |



### 3.5.2 Comparison

| Name         | $\Delta_{def}$ | Symmetric  |            | General    |            |
|--------------|----------------|------------|------------|------------|------------|
|              |                | $\Delta_l$ | $\Delta_a$ | $\Delta_l$ | $\Delta_a$ |
| 7p_P16_6_3_4 | -0.01209       | 0.00214    | 0.00214    | 0.00223    | 0.00217    |
| 7p_P9_3_1_2  | 0.00658        | 0.00282    | 0.00282    | 0.00280    | 0.00280    |
| 7p_P11_4_1_3 | 0.00165        | 0.00979    | 0.00980    | 0.00978    | 0.00978    |
| 7p_P16_6_2_5 | 0.18671        | 0.01211    | 0.00765    | 0.01716    | 0.00634    |
| 7p_P14_5_2_4 | 0.00160        | 0.01664    | 0.01665    | 0.01661    | 0.01662    |
| 7p_P15_4_4_4 | -0.26451       | 0.02021    | 0.02022    | 0.02637    | 0.02789    |
| 7p_P12_4_2_3 | 0.00446        | 0.02120    | 0.02121    | 0.02111    | 0.02113    |
| 7p_P13_5_2_3 | 0.00347        | 0.02125    | 0.02126    | 0.02119    | 0.02119    |
| 7p_P17_7_2_5 | -0.01221       | 0.02363    | 0.02369    | 0.02401    | 0.02398    |
| 7p_P12_3_3_3 | -0.32778       | 0.02404    | 0.02407    | 0.03349    | 0.03351    |
| 7p_P17_7_3_4 | -0.21894       | 0.02413    | 0.02413    | 0.03011    | 0.03006    |
| 7p_P15_6_2_4 | -0.00194       | 0.02435    | 0.02436    | 0.02442    | 0.02441    |
| 7p_P17_6_3_5 | -0.00974       | 0.02541    | 0.02540    | 0.02566    | 0.02567    |
| 7p_P15_5_3_4 | -0.00006       | 0.02561    | 0.02565    | 0.02566    | 0.02565    |
| 7p_P17_8_3_3 | -0.49686       | 0.02575    | 0.02574    | 0.04302    | 0.04276    |
| 7p_P9_2_2_2  | -0.01611       | 0.02951    | 0.02952    | 0.03000    | 0.03000    |
| 7p_P17_5_4_5 | -0.02192       | 0.03214    | 0.03213    | 0.03287    | 0.03284    |
| 7p_P13_6_2_2 | -0.41516       | 0.04093    | 0.04094    | 0.06237    | 0.06243    |
| 7p_P14_4_3_4 | -0.00015       | 0.04437    | 0.04438    | 0.04441    | 0.04439    |
| 7p_P16_4_4_5 | -0.20203       | 0.04582    | 0.04584    | 0.05612    | 0.05697    |
| 7p_P16_5_3_5 | -0.00219       | 0.05637    | 0.05646    | 0.05658    | 0.05658    |
| 7p_P16_7_2_4 | -0.01452       | 0.05801    | 0.05803    | 0.05914    | 0.05888    |
| 7p_P15_5_2_5 | -0.05206       | 0.06006    | 0.04031    | 0.07069    | 0.04247    |
| 7p_P14_3_4_4 | -0.23943       | 0.06056    | 0.06057    | 0.07820    | 0.07704    |
| 7p_P13_4_2_4 | -0.00089       | 0.06063    | 0.06065    | 0.06070    | 0.06070    |
| 7p_P12_5_1_3 | 0.00115        | 0.06227    | 0.06230    | 0.06220    | 0.06223    |
| 7p_P13_3_3_4 | -0.19891       | 0.06286    | 0.06293    | 0.07694    | 0.07683    |
| 7p_P14_6_2_3 | -0.00319       | 0.06321    | 0.06322    | 0.06342    | 0.06342    |
| 7p_P11_3_2_3 | 0.00185        | 0.06552    | 0.06558    | 0.06548    | 0.06546    |
| 7p_P10_3_1_3 | 0.07709        | 0.06874    | 0.05585    | 0.08815    | 0.05170    |
| 7p_P10_4_1_2 | 0.00260        | 0.07501    | 0.07501    | 0.07482    | 0.07483    |
| 7p_P16_3_5_5 | -0.00120       | 0.07676    | 0.07688    | 0.07685    | 0.09602    |
| 7p_P17_8_2_4 | -0.04164       | 0.08198    | 0.08204    | 0.08565    | 0.08553    |
| 7p_P17_5_3_6 | 0.00294        | 0.08344    | 0.08352    | 0.08329    | 0.08327    |
| 7p_P15_4_3_5 | 0.03217        | 0.08411    | 0.08419    | 0.08157    | 0.08152    |

| Name         | $\Delta_{def}$ | Symmetric  |            | General    |            |
|--------------|----------------|------------|------------|------------|------------|
|              |                | $\Delta_l$ | $\Delta_a$ | $\Delta_l$ | $\Delta_a$ |
| 7p_P8_2_1_2  | 0.00807        | 0.09187    | 0.09197    | 0.09123    | 0.09123    |
| 7p_P15_7_2_3 | -0.01528       | 0.09361    | 0.09363    | 0.09507    | 0.09507    |
| 7p_P13_6_1_3 | 0.00137        | 0.09815    | 0.09820    | 0.09804    | 0.09807    |

## 3.6 8p

### 3.6.1 Missing

| Name         | General    |            |
|--------------|------------|------------|
|              | $\Delta_l$ | $\Delta_a$ |
| 8p_P17_5_3_6 | 0.08966    | 0.09515    |

### 3.6.2 New

| Name         | Symmetric  |            |
|--------------|------------|------------|
|              | $\Delta_l$ | $\Delta_a$ |
| 8p_P15_4_4_4 | 0.03571    | 0.03574    |
| 8p_P14_7_2_2 | 0.07303    | 0.07301    |
| 8p_P6_1_1_1  | 0.07328    | 0.07333    |
| 8p_P13_3_3_4 | 0.07523    | 0.07531    |
| 8p_P9_4_1_1  | 0.07718    | 0.07717    |
| 8p_P15_5_2_5 | 0.08666    | 0.04818    |
| 8p_P17_4_4_6 | 0.08865    | 0.08872    |
| 8p_P16_3_5_5 | 0.09032    | 0.09060    |
| 8p_P15_3_4_5 | 0.09362    | 0.09365    |
| 8p_P10_3_1_3 | 0.09937    | 0.06669    |
| 8p_P17_3_5_6 | 0.09972    | 0.09988    |

### 3.6.3 Comparison

| Name         | $\Delta_{def}$ | Symmetric  |            | General    |            |
|--------------|----------------|------------|------------|------------|------------|
|              |                | $\Delta_l$ | $\Delta_a$ | $\Delta_l$ | $\Delta_a$ |
| 8p_P11_4_1_3 | 0.15975        | 0.00686    | 0.00449    | 0.00857    | 0.00383    |
| 8p_P13_5_2_3 | -0.00517       | 0.00771    | 0.00771    | 0.00775    | 0.00775    |
| 8p_P15_6_2_4 | -0.00603       | 0.01089    | 0.01089    | 0.01096    | 0.01096    |
| 8p_P17_7_2_5 | -0.06307       | 0.01167    | 0.01168    | 0.01244    | 0.01244    |
| 8p_P16_6_3_4 | 0.08154        | 0.01205    | 0.01207    | 0.01111    | 0.01133    |
| 8p_P17_7_3_4 | -0.04547       | 0.01412    | 0.01414    | 0.01495    | 0.01480    |
| 8p_P9_3_1_2  | 0.00626        | 0.01497    | 0.01499    | 0.01490    | 0.01490    |
| 8p_P17_8_3_3 | -0.57631       | 0.02575    | 0.02575    | 0.04772    | 0.04660    |
| 8p_P16_6_2_5 | 0.19715        | 0.02974    | 0.01645    | 0.04210    | 0.01350    |
| 8p_P14_5_2_4 | 0.00081        | 0.03155    | 0.03156    | 0.03153    | 0.03153    |
| 8p_P15_5_3_4 | 0.07469        | 0.03510    | 0.03510    | 0.03288    | 0.03257    |
| 8p_P12_4_2_3 | 0.00490        | 0.03577    | 0.03575    | 0.03560    | 0.03561    |
| 8p_P17_6_3_5 | -0.00243       | 0.03624    | 0.03623    | 0.03633    | 0.03745    |
| 8p_P17_5_4_5 | -0.02398       | 0.03782    | 0.03785    | 0.03874    | 0.03983    |
| 8p_P13_6_2_2 | -0.41758       | 0.04088    | 0.04093    | 0.06246    | 0.06255    |
| 8p_P12_3_3_3 | -0.31593       | 0.04268    | 0.04273    | 0.05869    | 0.05950    |
| 8p_P16_7_2_4 | -0.03216       | 0.04425    | 0.04425    | 0.04601    | 0.04570    |
| 8p_P12_5_1_3 | 0.00100        | 0.04842    | 0.04843    | 0.04839    | 0.04838    |
| 8p_P14_4_3_4 | 0.03314        | 0.05029    | 0.05029    | 0.04865    | 0.04974    |
| 8p_P14_6_2_3 | -0.00075       | 0.05029    | 0.05029    | 0.05038    | 0.05033    |
| 8p_P9_2_2_2  | -0.00400       | 0.05225    | 0.05226    | 0.05257    | 0.05247    |
| 8p_P16_4_4_5 | -0.26381       | 0.05808    | 0.05820    | 0.07757    | 0.07589    |
| 8p_P10_4_1_2 | 0.00427        | 0.05881    | 0.05883    | 0.05858    | 0.05858    |
| 8p_P17_4_5_5 | -0.21465       | 0.05939    | 0.05944    | 0.07367    | 0.07420    |
| 8p_P17_8_2_4 | -0.08271       | 0.06889    | 0.06890    | 0.07505    | 0.07484    |
| 8p_P16_5_3_5 | 0.00777        | 0.07068    | 0.07069    | 0.07015    | 0.07014    |
| 8p_P11_3_2_3 | 0.02266        | 0.07433    | 0.07436    | 0.07266    | 0.07298    |
| 8p_P13_4_2_4 | 0.00095        | 0.07616    | 0.07625    | 0.07625    | 0.07618    |
| 8p_P14_3_4_4 | -0.22981       | 0.07653    | 0.07660    | 0.09668    | 0.09649    |
| 8p_P15_7_2_3 | -0.01011       | 0.08197    | 0.08203    | 0.08293    | 0.08286    |
| 8p_P13_6_1_3 | 0.00056        | 0.08653    | 0.08651    | 0.08648    | 0.08648    |
| 8p_P15_4_3_5 | 0.01353        | 0.09270    | 0.09270    | 0.09145    | 0.09164    |

### 3.7 9p

#### 3.7.1 New

| Name         | Symmetric  |            |
|--------------|------------|------------|
|              | $\Delta_l$ | $\Delta_a$ |
| 9p_P9_2_2_2  | 0.07025    | 0.07025    |
| 9p_P14_7_2_2 | 0.07293    | 0.07301    |
| 9p_P9_4_1_1  | 0.07714    | 0.07718    |
| 9p_P13_3_3_4 | 0.08802    | 0.08802    |
| 9p_P14_3_4_4 | 0.08925    | 0.08926    |
| 9p_P16_8_2_3 | 0.09363    | 0.09370    |
| 9p_P17_4_4_6 | 0.09524    | 0.09534    |
| 9p_P15_4_3_5 | 0.09958    | 0.09968    |
| 9p_P6_1_1_1  | 0.09985    | 0.09990    |

### 3.7.2 Comparison

| Name         | $\Delta_{def}$ | Symmetric  |            | General    |            |
|--------------|----------------|------------|------------|------------|------------|
|              |                | $\Delta_l$ | $\Delta_a$ | $\Delta_l$ | $\Delta_a$ |
| 9p_P15_6_2_4 | -0.43889       | 0.00145    | 0.00145    | 0.00227    | 0.00227    |
| 9p_P13_5_2_3 | -0.00453       | 0.00216    | 0.00216    | 0.00217    | 0.00217    |
| 9p_P17_7_2_5 | -0.04626       | 0.00323    | 0.00323    | 0.00342    | 0.00338    |
| 9p_P13_4_3_3 | -0.72388       | 0.00441    | 0.00441    | 0.00941    | 0.00941    |
| 9p_P17_7_3_4 | -0.03909       | 0.00648    | 0.00648    | 0.00676    | 0.00674    |
| 9p_P16_5_4_4 | -0.84581       | 0.01205    | 0.01207    | 0.02971    | 0.03516    |
| 9p_P16_6_3_4 | 0.01166        | 0.01923    | 0.01925    | 0.01901    | 0.02001    |
| 9p_P11_4_1_3 | 0.21135        | 0.02074    | 0.01244    | 0.02637    | 0.01006    |
| 9p_P17_8_3_3 | -0.60303       | 0.02570    | 0.02574    | 0.04878    | 0.04797    |
| 9p_P9_3_1_2  | 0.00614        | 0.02853    | 0.02853    | 0.02836    | 0.02836    |
| 9p_P16_7_2_4 | -0.08436       | 0.03471    | 0.03478    | 0.03883    | 0.03784    |
| 9p_P12_5_1_3 | 0.00054        | 0.03851    | 0.03851    | 0.03849    | 0.03850    |
| 9p_P14_6_2_3 | -0.00844       | 0.04047    | 0.04050    | 0.04089    | 0.04084    |
| 9p_P13_6_2_2 | -0.42006       | 0.04094    | 0.04092    | 0.06271    | 0.06270    |
| 9p_P15_5_3_4 | 0.03846        | 0.04097    | 0.04096    | 0.03942    | 0.03971    |
| 9p_P14_5_2_4 | 0.00012        | 0.04250    | 0.04249    | 0.04250    | 0.04257    |
| 9p_P17_5_4_5 | -0.20477       | 0.04322    | 0.04326    | 0.05308    | 0.05470    |
| 9p_P17_6_3_5 | -0.02090       | 0.04496    | 0.04491    | 0.04634    | 0.04586    |
| 9p_P16_6_2_5 | 0.17558        | 0.04578    | 0.02142    | 0.06264    | 0.01796    |
| 9p_P10_4_1_2 | 0.00381        | 0.04737    | 0.04736    | 0.04719    | 0.04719    |
| 9p_P15_4_4_4 | -0.25377       | 0.04795    | 0.04803    | 0.06189    | 0.06317    |
| 9p_P12_4_2_3 | 0.00378        | 0.04892    | 0.04896    | 0.04891    | 0.04878    |
| 9p_P14_4_3_4 | -0.01792       | 0.05647    | 0.05650    | 0.05749    | 0.06225    |
| 9p_P12_3_3_3 | -0.35278       | 0.05751    | 0.05755    | 0.08215    | 0.08464    |
| 9p_P17_8_2_4 | -0.13305       | 0.05950    | 0.05949    | 0.06833    | 0.06797    |
| 9p_P16_4_4_5 | -0.23689       | 0.06926    | 0.06933    | 0.08787    | 0.09222    |
| 9p_P17_4_5_5 | -0.23516       | 0.07004    | 0.07014    | 0.08870    | 0.08895    |
| 9p_P15_7_2_3 | -0.02429       | 0.07280    | 0.07285    | 0.07489    | 0.07464    |
| 9p_P13_6_1_3 | -0.00063       | 0.07784    | 0.07781    | 0.07789    | 0.07789    |
| 9p_P16_5_3_5 | 0.17802        | 0.07806    | 0.07810    | 0.06530    | 0.07950    |
| 9p_P11_3_2_3 | 0.08504        | 0.08033    | 0.08033    | 0.07378    | 0.07935    |
| 9p_P13_4_2_4 | -0.02480       | 0.08657    | 0.08984    | 0.09208    | 0.09210    |
| 9p_P11_5_1_2 | 0.00368        | 0.09689    | 0.09699    | 0.09673    | 0.09663    |

### 3.8 10p

#### 3.8.1 New

| Name          | Symmetric  |            |
|---------------|------------|------------|
|               | $\Delta_l$ | $\Delta_a$ |
| 10p_P13_4_3_3 | 0.01568    | 0.01569    |
| 10p_P16_5_4_4 | 0.02178    | 0.02182    |
| 10p_P14_7_2_2 | 0.07303    | 0.07303    |
| 10p_P9_4_1_1  | 0.07717    | 0.07716    |
| 10p_P16_4_4_5 | 0.07832    | 0.07831    |
| 10p_P17_4_5_5 | 0.07870    | 0.07879    |
| 10p_P9_2_2_2  | 0.08491    | 0.08492    |
| 10p_P11_3_2_3 | 0.08531    | 0.08533    |
| 10p_P16_8_2_3 | 0.08688    | 0.08688    |
| 10p_P13_3_3_4 | 0.09884    | 0.09888    |
| 10p_P14_3_4_4 | 0.09946    | 0.09956    |

### 3.8.2 Comparison

| Name          | $\Delta_{def}$ | Symmetric  |            | General    |            |
|---------------|----------------|------------|------------|------------|------------|
|               |                | $\Delta_l$ | $\Delta_a$ | $\Delta_l$ | $\Delta_a$ |
| 10p_P17_7_3_4 | -0.62299       | 0.00054    | 0.00054    | 0.00106    | 0.00103    |
| 10p_P17_7_2_5 | -0.00764       | 0.00448    | 0.00187    | 0.00451    | 0.00322    |
| 10p_P15_6_2_4 | 0.07068        | 0.00548    | 0.00548    | 0.00511    | 0.00541    |
| 10p_P13_5_2_3 | 0.07571        | 0.00952    | 0.00952    | 0.00883    | 0.00943    |
| 10p_P17_8_3_3 | -0.59637       | 0.02575    | 0.02574    | 0.04833    | 0.04761    |
| 10p_P16_6_3_4 | 0.06810        | 0.02613    | 0.02615    | 0.02441    | 0.02592    |
| 10p_P16_7_2_4 | -0.14332       | 0.02823    | 0.02829    | 0.03356    | 0.03266    |
| 10p_P12_5_1_3 | 0.00036        | 0.03122    | 0.03124    | 0.03123    | 0.03123    |
| 10p_P11_4_1_3 | 0.16670        | 0.03234    | 0.01752    | 0.03881    | 0.01482    |
| 10p_P14_6_2_3 | -0.02503       | 0.03304    | 0.03306    | 0.03400    | 0.03390    |
| 10p_P10_4_1_2 | 0.00350        | 0.03877    | 0.03876    | 0.03863    | 0.03863    |
| 10p_P9_3_1_2  | 0.00577        | 0.03897    | 0.03897    | 0.03875    | 0.03875    |
| 10p_P13_6_2_2 | -0.42098       | 0.04093    | 0.04094    | 0.06275    | 0.06282    |
| 10p_P15_5_3_4 | -0.00487       | 0.04464    | 0.04463    | 0.04486    | 0.04501    |
| 10p_P17_5_4_5 | -0.12276       | 0.04829    | 0.04830    | 0.05461    | 0.07187    |
| 10p_P14_5_2_4 | 0.02135        | 0.05027    | 0.05032    | 0.04921    | 0.05031    |
| 10p_P17_6_3_5 | 0.02191        | 0.05232    | 0.05234    | 0.05119    | 0.05303    |
| 10p_P17_8_2_4 | -0.19695       | 0.05259    | 0.05258    | 0.06526    | 0.06407    |
| 10p_P15_4_4_4 | -0.17185       | 0.05801    | 0.05800    | 0.06892    | 0.07720    |
| 10p_P12_4_2_3 | 0.00426        | 0.05887    | 0.05892    | 0.05862    | 0.05945    |
| 10p_P16_6_2_5 | 0.13897        | 0.06026    | 0.02397    | 0.05243    | 0.04963    |
| 10p_P14_4_3_4 | -0.03170       | 0.06185    | 0.06182    | 0.06384    | 0.07064    |
| 10p_P15_7_2_3 | -0.04263       | 0.06560    | 0.06559    | 0.06865    | 0.06845    |
| 10p_P12_3_3_3 | -0.03253       | 0.06958    | 0.06962    | 0.07188    | 0.07210    |
| 10p_P13_6_1_3 | 0.00178        | 0.07131    | 0.07129    | 0.07118    | 0.07123    |
| 10p_P16_5_3_5 | 0.04498        | 0.08336    | 0.08338    | 0.07969    | 0.08218    |
| 10p_P11_5_1_2 | 0.00214        | 0.08880    | 0.08880    | 0.08861    | 0.08862    |

### 3.9 ta

#### 3.9.1 Comparison

| Name           | $\Delta_{def}$ | Symmetric  |            | General    |            |
|----------------|----------------|------------|------------|------------|------------|
|                |                | $\Delta_l$ | $\Delta_a$ | $\Delta_l$ | $\Delta_a$ |
| ta_P17_4_3_3_3 | 0.00132        | 0.03355    | 0.03356    | 0.03351    | 0.03353    |
| ta_P15_2_3_3_3 | 0.00073        | 0.03772    | 0.03777    | 0.03774    | 0.03774    |
| ta_P13_3_2_2_2 | 0.00178        | 0.05361    | 0.05362    | 0.05352    | 0.05352    |
| ta_P17_3_3_4_3 | 0.01154        | 0.06384    | 0.06384    | 0.06311    | 0.06525    |
| ta_P11_1_2_2_2 | 0.00172        | 0.06443    | 0.06451    | 0.06440    | 0.06440    |
| ta_P17_2_4_3_4 | 0.00105        | 0.06549    | 0.06554    | 0.06545    | 0.06547    |
| ta_P14_2_3_2_3 | 0.00076        | 0.07270    | 0.07266    | 0.07264    | 0.07264    |
| ta_P14_1_3_3_3 | 0.04908        | 0.07861    | 0.08331    | 0.07484    | 0.08343    |
| ta_P14_3_2_3_2 | 0.00023        | 0.08599    | 0.08605    | 0.08604    | 0.08603    |
| ta_P17_3_3_3_4 | -0.00088       | 0.09178    | 0.09179    | 0.09186    | 0.09190    |
| ta_P17_1_4_4_4 | -0.00841       | 0.06606    | 0.09376    | 0.06662    | 0.09599    |
| ta_P14_4_2_2_2 | 0.00230        | 0.09631    | 0.09634    | 0.09611    | 0.09612    |
| ta_P13_2_2_3_2 | 0.00083        | 0.09856    | 0.09863    | 0.09867    | 0.09855    |
| ta_P16_2_3_4_3 | 0.00022        | 0.09881    | 0.09885    | 0.09879    | 0.09883    |
| ta_P9_2_1_1_1  | 0.00490        | 0.09990    | 0.09993    | 0.09944    | 0.09944    |



### 3.10 sa

#### 3.10.1 Comparison

| Name           | $\Delta_{def}$ | Symmetric  |            | General    |            |
|----------------|----------------|------------|------------|------------|------------|
|                |                | $\Delta_l$ | $\Delta_a$ | $\Delta_l$ | $\Delta_a$ |
| sa_P14_4_2_2_2 | 0.00131        | 0.00731    | 0.00731    | 0.00730    | 0.00730    |
| sa_P9_2_1_1_1  | 0.00256        | 0.02076    | 0.02078    | 0.02073    | 0.02073    |
| sa_P13_3_2_2_2 | 0.00111        | 0.03980    | 0.03981    | 0.03977    | 0.03977    |
| sa_P17_4_3_3_3 | 0.02614        | 0.04412    | 0.04419    | 0.04298    | 0.04492    |
| sa_P15_5_2_2_2 | 0.00124        | 0.04704    | 0.04702    | 0.04698    | 0.04697    |
| sa_P10_3_1_1_1 | 0.00283        | 0.06432    | 0.06430    | 0.06414    | 0.06413    |
| sa_P16_4_3_2_3 | -0.00042       | 0.06961    | 0.06965    | 0.06965    | 0.06968    |
| sa_P16_3_3_3_3 | 0.00028        | 0.07904    | 0.07901    | 0.07905    | 0.07899    |
| sa_P15_4_2_3_2 | 0.01152        | 0.08220    | 0.08220    | 0.08126    | 0.08224    |
| sa_P16_6_2_2_2 | 0.00096        | 0.08559    | 0.08560    | 0.08553    | 0.08552    |
| sa_P16_5_2_3_2 | 0.00802        | 0.08886    | 0.08890    | 0.08815    | 0.08916    |
| sa_P15_3_3_2_3 | 0.00075        | 0.08977    | 0.08986    | 0.08983    | 0.08979    |
| sa_P17_5_3_2_3 | 0.00087        | 0.09089    | 0.09093    | 0.09081    | 0.09098    |
| sa_P12_2_2_2_2 | 0.00152        | 0.09494    | 0.09503    | 0.09490    | 0.09489    |
| sa_P17_5_2_3_3 | 0.00018        | 0.09967    | 0.09968    | 0.09965    | 0.09976    |

### 3.11 pa

#### 3.11.1 Comparison

| Name           | $\Delta_{def}$ | Symmetric  |            | General    |            |
|----------------|----------------|------------|------------|------------|------------|
|                |                | $\Delta_l$ | $\Delta_a$ | $\Delta_l$ | $\Delta_a$ |
| pa_P16_6_2_2_2 | 0.00084        | 0.04227    | 0.04228    | 0.04224    | 0.04224    |
| pa_P14_4_2_2_2 | 0.00119        | 0.04427    | 0.04426    | 0.04424    | 0.04421    |
| pa_P17_5_3_2_3 | 0.03209        | 0.07325    | 0.07335    | 0.07094    | 0.07364    |
| pa_P17_7_2_2_2 | 0.00735        | 0.07708    | 0.07708    | 0.07652    | 0.07731    |
| pa_P11_4_1_1_1 | 0.00157        | 0.08178    | 0.08179    | 0.08166    | 0.08166    |
| pa_P16_5_2_3_2 | 0.04920        | 0.08442    | 0.08447    | 0.08037    | 0.08531    |
| pa_P17_6_2_3_2 | 0.02835        | 0.08517    | 0.08516    | 0.08279    | 0.08632    |
| pa_P9_2_1_1_1  | 0.00173        | 0.08612    | 0.08622    | 0.08607    | 0.08607    |
| pa_P17_4_3_3_3 | 0.03740        | 0.08739    | 0.08739    | 0.08418    | 0.08941    |
| pa_P16_4_3_2_3 | 0.00039        | 0.08973    | 0.08975    | 0.08974    | 0.08971    |
| pa_P13_3_2_2_2 | 0.00120        | 0.09316    | 0.09318    | 0.09307    | 0.09307    |

### 3.12 ha

#### 3.12.1 New

| Name           | Symmetric  |            |
|----------------|------------|------------|
|                | $\Delta_l$ | $\Delta_a$ |
| ha_P16_5_2_3_2 | 0.07382    | 0.09893    |

#### 3.12.2 Comparison

| Name           | $\Delta_{def}$ | Symmetric  |            | General    |            |
|----------------|----------------|------------|------------|------------|------------|
|                |                | $\Delta_l$ | $\Delta_a$ | $\Delta_l$ | $\Delta_a$ |
| ha_P16_6_2_2_2 | 0.00039        | 0.01074    | 0.01074    | 0.01074    | 0.01074    |
| ha_P15_5_2_2_2 | 0.00354        | 0.03371    | 0.03369    | 0.03359    | 0.03372    |
| ha_P11_4_1_1_1 | 0.00133        | 0.04185    | 0.04182    | 0.04179    | 0.04178    |
| ha_P10_3_1_1_1 | 0.00027        | 0.04358    | 0.04359    | 0.04357    | 0.04358    |
| ha_P17_7_2_2_2 | 0.02877        | 0.04975    | 0.04976    | 0.04834    | 0.05063    |
| ha_P14_4_2_2_2 | 0.01296        | 0.07664    | 0.07662    | 0.07565    | 0.07727    |
| ha_P17_6_2_3_2 | 0.09481        | 0.08101    | 0.08101    | 0.07368    | 0.08518    |
| ha_P17_5_3_2_3 | 0.00273        | 0.08158    | 0.08165    | 0.08136    | 0.08171    |
| ha_P16_5_2_2_3 | -0.00070       | 0.09860    | 0.09861    | 0.09869    | 0.09868    |

### 3.13 7a

#### 3.13.1 New

| Name           | Symmetric  |            |
|----------------|------------|------------|
|                | $\Delta_l$ | $\Delta_a$ |
| 7a_P14_4_2_2_2 | 0.09740    | 0.09742    |

### 3.13.2 Comparison

| Name           | $\Delta_{def}$ | Symmetric  |            | General    |            |
|----------------|----------------|------------|------------|------------|------------|
|                |                | $\Delta_l$ | $\Delta_a$ | $\Delta_l$ | $\Delta_a$ |
| 7a_P16_6_2_2_2 | 0.02617        | 0.01286    | 0.01288    | 0.01253    | 0.01317    |
| 7a_P11_4_1_1_1 | 0.00151        | 0.01309    | 0.01309    | 0.01307    | 0.01307    |
| 7a_P17_7_2_2_2 | 0.05003        | 0.02993    | 0.02992    | 0.02847    | 0.03111    |
| 7a_P15_5_2_2_2 | 0.04382        | 0.05936    | 0.05935    | 0.05681    | 0.06047    |
| 7a_P10_3_1_1_1 | -0.00684       | 0.06247    | 0.07431    | 0.07444    | 0.07482    |
| 7a_P12_5_1_1_1 | 0.00186        | 0.08191    | 0.08191    | 0.08196    | 0.08176    |
| 7a_P17_5_3_2_3 | -0.00010       | 0.08999    | 0.08999    | 0.09008    | 0.09000    |
| 7a_P17_6_2_2_3 | 0.00295        | 0.09843    | 0.09847    | 0.09814    | 0.09849    |
| 7a_P17_6_2_3_2 | 0.01819        | 0.04211    | 0.09879    | 0.08212    | 0.09701    |

## 3.14 8a

### 3.14.1 New

| Name           | Symmetric  |            |
|----------------|------------|------------|
|                | $\Delta_l$ | $\Delta_a$ |
| 8a_P17_6_2_3_2 | 0.06787    | 0.09899    |

### 3.14.2 Comparison

| Name           | $\Delta_{def}$ | Symmetric  |            | General    |            |
|----------------|----------------|------------|------------|------------|------------|
|                |                | $\Delta_l$ | $\Delta_a$ | $\Delta_l$ | $\Delta_a$ |
| 8a_P11_4_1_1_1 | 0.00138        | 0.00800    | 0.00800    | 0.00800    | 0.00799    |
| 8a_P17_7_2_2_2 | 0.00202        | 0.01526    | 0.01526    | 0.01523    | 0.01653    |
| 8a_P16_6_2_2_2 | -0.00926       | 0.03083    | 0.03085    | 0.03112    | 0.03183    |
| 8a_P12_5_1_1_1 | 0.00688        | 0.06485    | 0.06492    | 0.06441    | 0.06532    |
| 8a_P15_5_2_2_2 | -0.09217       | 0.05795    | 0.07653    | 0.08059    | 0.08392    |
| 8a_P17_6_2_2_3 | -0.00340       | 0.09302    | 0.09299    | 0.09334    | 0.09334    |
| 8a_P10_3_1_1_1 | -0.03753       | 0.08800    | 0.09425    | 0.09467    | 0.09785    |
| 8a_P17_5_3_2_3 | 0.00958        | 0.09883    | 0.09900    | 0.09789    | 0.09917    |

### 3.15 9a

#### 3.15.1 New

| Name           | Symmetric  |            |
|----------------|------------|------------|
|                | $\Delta_l$ | $\Delta_a$ |
| 9a_P15_5_2_2_2 | 0.05639    | 0.09697    |

#### 3.15.2 Comparison

| Name           | $\Delta_{def}$ | Symmetric  |            | General    |            |
|----------------|----------------|------------|------------|------------|------------|
|                |                | $\Delta_l$ | $\Delta_a$ | $\Delta_l$ | $\Delta_a$ |
| 9a_P17_7_2_2_2 | -0.03914       | 0.00433    | 0.00433    | 0.00450    | 0.00459    |
| 9a_P11_4_1_1_1 | 0.00100        | 0.02344    | 0.02345    | 0.02342    | 0.02343    |
| 9a_P16_6_2_2_2 | -0.03111       | 0.04425    | 0.04426    | 0.04565    | 0.04626    |
| 9a_P12_5_1_1_1 | 0.00140        | 0.05229    | 0.05231    | 0.05222    | 0.05234    |
| 9a_P17_6_2_2_3 | 0.00386        | 0.09305    | 0.09304    | 0.09269    | 0.09351    |

### 3.16 10a

#### 3.16.1 Comparison

| Name            | $\Delta_{def}$ | Symmetric  |            | General    |            |
|-----------------|----------------|------------|------------|------------|------------|
|                 |                | $\Delta_l$ | $\Delta_a$ | $\Delta_l$ | $\Delta_a$ |
| 10a_P17_7_2_2_2 | 0.04974        | 0.00386    | 0.00386    | 0.00367    | 0.00370    |
| 10a_P11_4_1_1_1 | 0.00413        | 0.03467    | 0.03468    | 0.03453    | 0.03482    |
| 10a_P12_5_1_1_1 | 0.00297        | 0.04283    | 0.04282    | 0.04270    | 0.04294    |
| 10a_P16_6_2_2_2 | -0.03027       | 0.05385    | 0.05386    | 0.05550    | 0.05646    |
| 10a_P13_6_1_1_1 | 0.00931        | 0.09223    | 0.09225    | 0.09138    | 0.09406    |
| 10a_P17_6_2_2_3 | -0.01109       | 0.09395    | 0.09403    | 0.09521    | 0.09508    |

### 3.17 Pte

#### 3.17.1 Missing

| Name          | General    |            |
|---------------|------------|------------|
|               | $\Delta_l$ | $\Delta_a$ |
| Pte_P13_3_3_4 | 0.08042    | 0.08042    |

### 3.17.2 New

| Name          | Symmetric  |            |
|---------------|------------|------------|
|               | $\Delta_l$ | $\Delta_a$ |
| Pte_P17_4_5_5 | 0.05163    | 0.05168    |
| Pte_P16_5_4_4 | 0.05799    | 0.05800    |
| Pte_P13_4_3_3 | 0.08040    | 0.08047    |
| Pte_P17_5_4_5 | 0.08117    | 0.08123    |

### 3.17.3 Comparison

| Name          | $\Delta_{def}$ | Symmetric  |            | General    |            |
|---------------|----------------|------------|------------|------------|------------|
|               |                | $\Delta_l$ | $\Delta_a$ | $\Delta_l$ | $\Delta_a$ |
| Pte_P14_3_4_4 | 0.00029        | 0.07319    | 0.07318    | 0.07317    | 0.07317    |
| Pte_P16_4_4_5 | 0.29992        | 0.07846    | 0.07848    | 0.05801    | 0.05801    |

## 3.18 Poc2

### 3.18.1 Missing

| Name             | General    |            |
|------------------|------------|------------|
|                  | $\Delta_l$ | $\Delta_a$ |
| Poc2_P12_1_3_1_3 | 0.09445    | 0.09966    |

### 3.18.2 Comparison

| Name             | $\Delta_{def}$ | Symmetric  |            | General    |            |
|------------------|----------------|------------|------------|------------|------------|
|                  |                | $\Delta_l$ | $\Delta_a$ | $\Delta_l$ | $\Delta_a$ |
| Poc2_P14_2_3_2_3 | 0.00175        | 0.00000    | 0.02778    | 0.01016    | 0.02773    |
| Poc2_P16_2_4_2_4 | 0.00105        | 0.00002    | 0.04762    | 0.00092    | 0.04757    |
| Poc2_P10_1_2_1_2 | 0.00594        | 0.00003    | 0.06250    | 0.05736    | 0.06213    |

### 3.19 Pic

#### 3.19.1 Missing

| Name              | General    |            |
|-------------------|------------|------------|
|                   | $\Delta_l$ | $\Delta_a$ |
| Pic_P12_2_1_2_1_1 | 0.06157    | 0.06157    |
| Pic_P14_1_3_1_2_2 | 0.09164    | 0.09163    |
| Pic_P16_2_3_2_2_2 | 0.09709    | 0.09709    |

#### 3.19.2 Comparison

| Name              | $\Delta_{def}$ | Symmetric  |            | General    |            |
|-------------------|----------------|------------|------------|------------|------------|
|                   |                | $\Delta_l$ | $\Delta_a$ | $\Delta_l$ | $\Delta_a$ |
| Pic_P17_3_2_3_2_2 | 0.70261        | 0.05981    | 0.05985    | 0.02872    | 0.02873    |
| Pic_P13_1_2_1_2_2 | 0.15389        | 0.06545    | 0.06049    | 0.05610    | 0.05611    |
| Pic_P16_2_2_3_2_2 | 0.16166        | 0.08022    | 0.08024    | 0.06822    | 0.06834    |
| Pic_P14_1_2_2_2_2 | 0.14962        | 0.08900    | 0.08905    | 0.07666    | 0.07665    |
| Pic_P16_1_3_1_3_3 | 0.04556        | 0.09204    | 0.09204    | 0.08794    | 0.08804    |
| Pic_P17_1_4_1_3_3 | 0.92561        | 0.03965    | 0.09333    | 0.01456    | 0.09250    |
| Pic_P17_1_3_3_2_3 | 0.00551        | 0.07692    | 0.09333    | 0.09277    | 0.09282    |
| Pic_P17_1_3_2_3_3 | -0.01036       | 0.09437    | 0.09435    | 0.09535    | 0.09534    |
| Pic_P16_1_3_2_2_3 | 0.00271        | 0.09504    | 0.09502    | 0.09478    | 0.09478    |

### 3.20 Att

#### 3.20.1 Missing

| Name          | General    |            |
|---------------|------------|------------|
|               | $\Delta_l$ | $\Delta_a$ |
| Att_P11_2_1_5 | 0.07479    | 0.07479    |
| Att_P16_4_2_7 | 0.09551    | 0.09552    |

### 3.20.2 New

| Name          | Symmetric  |            |
|---------------|------------|------------|
|               | $\Delta_l$ | $\Delta_a$ |
| Att_P16_2_3_8 | 0.00469    | 0.00469    |
| Att_P12_1_2_6 | 0.03381    | 0.03385    |
| Att_P14_2_2_7 | 0.05219    | 0.05219    |
| Att_P14_1_3_7 | 0.05996    | 0.06002    |
| Att_P16_1_4_8 | 0.07917    | 0.07921    |
| Att_P10_1_1_5 | 0.08850    | 0.08849    |

### 3.20.3 Comparison

| Name          | $\Delta_{def}$ | Symmetric  |            | General    |            |
|---------------|----------------|------------|------------|------------|------------|
|               |                | $\Delta_l$ | $\Delta_a$ | $\Delta_l$ | $\Delta_a$ |
| Att_P16_2_5_6 | 0.00006        | 0.00055    | 0.00055    | 0.00055    | 0.00055    |
| Att_P16_2_4_7 | -0.04079       | 0.00085    | 0.00085    | 0.00089    | 0.00093    |
| Att_P11_1_3_4 | 0.00199        | 0.00509    | 0.00509    | 0.00508    | 0.00508    |
| Att_P15_2_3_7 | -0.01576       | 0.00709    | 0.00709    | 0.00721    | 0.00720    |
| Att_P17_2_5_7 | 0.00779        | 0.00788    | 0.00788    | 0.00782    | 0.00786    |
| Att_P17_2_4_8 | -0.00685       | 0.01020    | 0.01021    | 0.01029    | 0.01028    |
| Att_P15_2_4_6 | 0.00104        | 0.01075    | 0.01076    | 0.01074    | 0.01075    |
| Att_P11_1_2_5 | 0.00013        | 0.01176    | 0.01176    | 0.01176    | 0.01176    |
| Att_P10_1_2_4 | -0.00011       | 0.01329    | 0.01330    | 0.01330    | 0.01330    |
| Att_P14_2_3_6 | -0.00028       | 0.02173    | 0.02175    | 0.02175    | 0.02176    |
| Att_P12_1_3_5 | -0.00114       | 0.02309    | 0.02314    | 0.02316    | 0.02317    |
| Att_P14_2_4_5 | 0.00179        | 0.02367    | 0.02368    | 0.02364    | 0.02364    |
| Att_P13_1_4_5 | -0.00408       | 0.02394    | 0.02399    | 0.02404    | 0.02414    |
| Att_P14_1_5_5 | -0.00260       | 0.00213    | 0.02778    | 0.02784    | 0.02785    |
| Att_P11_2_3_3 | 0.10530        | 0.00539    | 0.02780    | 0.02500    | 0.02502    |
| Att_P14_3_4_4 | -0.08316       | 0.02794    | 0.02796    | 0.03052    | 0.03039    |
| Att_P17_4_5_5 | -0.11016       | 0.03006    | 0.03008    | 0.03356    | 0.03359    |
| Att_P17_3_5_6 | 0.00405        | 0.03174    | 0.03174    | 0.03161    | 0.03164    |
| Att_P17_3_3_8 | -0.00358       | 0.03174    | 0.03175    | 0.03195    | 0.03186    |
| Att_P13_2_2_6 | 0.00050        | 0.03346    | 0.03352    | 0.03351    | 0.03350    |
| Att_P17_3_4_7 | 0.00026        | 0.03701    | 0.03700    | 0.03700    | 0.03700    |
| Att_P15_1_5_6 | 1.08225        | 0.03953    | 0.03953    | 0.01177    | 0.04003    |
| Att_P13_1_3_6 | -0.00020       | 0.04078    | 0.04081    | 0.04082    | 0.04082    |
| Att_P13_2_3_5 | 0.00016        | 0.04211    | 0.04212    | 0.04212    | 0.04211    |
| Att_P14_1_4_6 | -0.00788       | 0.04402    | 0.04404    | 0.04437    | 0.04444    |
| Att_P9_1_2_3  | 0.00253        | 0.04661    | 0.04660    | 0.04649    | 0.04650    |
| Att_P16_3_3_7 | -0.00127       | 0.04752    | 0.04750    | 0.04758    | 0.04762    |
| Att_P16_1_6_6 | 1.72246        | 0.00201    | 0.04762    | 0.00015    | 0.04782    |
| Att_P9_1_1_4  | 0.39975        | 0.05412    | 0.05409    | 0.03609    | 0.03608    |
| Att_P17_1_6_7 | 1.93919        | 0.05571    | 0.05571    | 0.00086    | 0.05724    |
| Att_P15_3_4_5 | -0.02971       | 0.05590    | 0.05593    | 0.05760    | 0.05762    |
| Att_P16_1_5_7 | -0.03891       | 0.05652    | 0.05662    | 0.05876    | 0.06006    |
| Att_P16_3_4_6 | -0.00034       | 0.05712    | 0.05714    | 0.05716    | 0.05716    |
| Att_P12_2_2_5 | 0.00014        | 0.05800    | 0.05805    | 0.05804    | 0.05804    |
| Att_P15_1_4_7 | -0.00142       | 0.05882    | 0.05892    | 0.05911    | 0.05900    |



| Name          | $\Delta_{def}$ | Symmetric  |            | General    |            |
|---------------|----------------|------------|------------|------------|------------|
|               |                | $\Delta_l$ | $\Delta_a$ | $\Delta_l$ | $\Delta_a$ |
| Att_P15_4_4_4 | -0.06015       | 0.06660    | 0.06667    | 0.07087    | 0.07080    |
| Att_P15_3_3_6 | 0.00028        | 0.06698    | 0.06704    | 0.06698    | 0.06702    |
| Att_P12_2_3_4 | 0.00283        | 0.06915    | 0.06919    | 0.06895    | 0.06901    |
| Att_P17_1_5_8 | -0.01296       | 0.07062    | 0.07065    | 0.07154    | 0.07221    |
| Att_P17_4_2_8 | -0.00165       | 0.07260    | 0.07260    | 0.07297    | 0.07272    |
| Att_P12_3_3_3 | -0.02523       | 0.07817    | 0.07822    | 0.08017    | 0.08290    |
| Att_P8_1_1_3  | 0.00090        | 0.08031    | 0.08036    | 0.08029    | 0.08029    |
| Att_P14_3_2_6 | -0.00063       | 0.08229    | 0.08228    | 0.08234    | 0.08234    |
| Att_P17_4_3_7 | 0.00183        | 0.08212    | 0.08234    | 0.08228    | 0.08219    |
| Att_P15_3_2_7 | 0.43260        | 0.09008    | 0.09008    | 0.05804    | 0.05804    |
| Att_P11_2_2_4 | 0.00057        | 0.09015    | 0.09015    | 0.09010    | 0.09011    |
| Att_P16_4_4_5 | -0.06416       | 0.09115    | 0.09119    | 0.09725    | 0.09724    |
| Att_P9_2_2_2  | 0.00208        | 0.09544    | 0.09552    | 0.09643    | 0.09532    |

### 3.21 Atc

#### 3.21.1 Missing

| Name          | General    |            |
|---------------|------------|------------|
|               | $\Delta_l$ | $\Delta_a$ |
| Atc_P17_4_2_8 | 0.08426    | 0.08376    |

#### 3.21.2 New

| Name          | Symmetric  |            |
|---------------|------------|------------|
|               | $\Delta_l$ | $\Delta_a$ |
| Atc_P16_2_3_8 | 0.00839    | 0.00840    |
| Atc_P12_1_2_6 | 0.01293    | 0.01294    |
| Atc_P14_1_3_7 | 0.03957    | 0.03965    |
| Atc_P15_1_5_6 | 0.04154    | 0.04155    |
| Atc_P14_2_2_7 | 0.04668    | 0.04674    |
| Atc_P17_1_6_7 | 0.05620    | 0.05626    |
| Atc_P16_1_4_8 | 0.05847    | 0.05857    |
| Atc_P17_4_3_7 | 0.08263    | 0.08265    |
| Atc_P10_1_1_5 | 0.08349    | 0.08356    |
| Atc_P11_2_1_5 | 0.08640    | 0.08646    |
| Atc_P17_4_4_6 | 0.09016    | 0.09028    |
| Atc_P11_2_2_4 | 0.09136    | 0.09136    |

### 3.21.3 Comparison

| Name          | $\Delta_{def}$ | Symmetric  |            | General    |            |
|---------------|----------------|------------|------------|------------|------------|
|               |                | $\Delta_l$ | $\Delta_a$ | $\Delta_l$ | $\Delta_a$ |
| Atc_P17_2_4_8 | -0.77078       | 0.00057    | 0.00060    | 0.00129    | 0.00152    |
| Atc_P17_2_5_7 | -0.02435       | 0.00130    | 0.00130    | 0.00133    | 0.00136    |
| Atc_P15_2_5_5 | -1.51559       | 0.00031    | 0.00322    | 0.02097    | 0.02334    |
| Atc_P10_1_3_3 | -0.00422       | 0.00046    | 0.00511    | 0.00513    | 0.00513    |
| Atc_P11_1_2_5 | -0.00495       | 0.00698    | 0.00699    | 0.00702    | 0.00702    |
| Atc_P11_1_3_4 | -0.13328       | 0.00828    | 0.00829    | 0.00950    | 0.00947    |
| Atc_P16_2_4_7 | -0.02387       | 0.00957    | 0.00958    | 0.00980    | 0.00981    |
| Atc_P16_2_5_6 | 1.96424        | 0.00998    | 0.00998    | 0.00009    | 0.01488    |
| Atc_P12_1_3_5 | -0.00297       | 0.01002    | 0.01002    | 0.01005    | 0.01005    |
| Atc_P15_2_3_7 | -0.01155       | 0.01884    | 0.01906    | 0.01923    | 0.01928    |
| Atc_P15_2_4_6 | -0.00602       | 0.01948    | 0.01951    | 0.01964    | 0.01963    |
| Atc_P13_1_4_5 | -0.00416       | 0.02218    | 0.02219    | 0.02228    | 0.02228    |
| Atc_P13_1_3_6 | -0.00267       | 0.02599    | 0.02600    | 0.02606    | 0.02609    |
| Atc_P14_1_5_5 | -0.03370       | 0.00212    | 0.02778    | 0.02873    | 0.02873    |
| Atc_P13_2_4_4 | -0.25025       | 0.02807    | 0.02809    | 0.03620    | 0.03612    |
| Atc_P10_1_2_4 | -0.00475       | 0.03116    | 0.03116    | 0.03131    | 0.03131    |
| Atc_P14_2_3_6 | 0.00348        | 0.03126    | 0.03128    | 0.03115    | 0.03150    |
| Atc_P16_3_5_5 | -0.11149       | 0.03461    | 0.03465    | 0.03875    | 0.03874    |
| Atc_P14_2_4_5 | -0.12855       | 0.03605    | 0.03604    | 0.04100    | 0.04417    |
| Atc_P14_1_4_6 | -0.00602       | 0.03659    | 0.03664    | 0.03685    | 0.03686    |
| Atc_P17_3_3_8 | 0.10594        | 0.03794    | 0.03794    | 0.03412    | 0.04466    |
| Atc_P17_3_4_7 | -0.07293       | 0.04012    | 0.04018    | 0.04316    | 0.05098    |
| Atc_P13_2_2_6 | -0.00535       | 0.04457    | 0.04458    | 0.04481    | 0.04485    |
| Atc_P13_2_3_5 | -0.00473       | 0.04601    | 0.04603    | 0.04623    | 0.04636    |
| Atc_P16_1_6_6 | -0.01957       | 0.00294    | 0.04762    | 0.04826    | 0.04856    |
| Atc_P15_1_4_7 | -0.00658       | 0.04840    | 0.04844    | 0.04877    | 0.04876    |
| Atc_P16_3_3_7 | -0.02479       | 0.05139    | 0.05149    | 0.05268    | 0.05317    |
| Atc_P16_1_5_7 | 0.03313        | 0.05481    | 0.05481    | 0.05302    | 0.05545    |
| Atc_P16_3_4_6 | -0.13326       | 0.05554    | 0.05549    | 0.06347    | 0.06396    |
| Atc_P17_3_5_6 | 0.14779        | 0.03715    | 0.05593    | 0.04745    | 0.04823    |
| Atc_P9_1_1_4  | -0.10600       | 0.05877    | 0.05881    | 0.06535    | 0.07016    |
| Atc_P9_1_2_3  | -0.18377       | 0.05966    | 0.05967    | 0.07173    | 0.07226    |
| Atc_P12_2_2_5 | -0.01741       | 0.06343    | 0.06346    | 0.06461    | 0.06457    |
| Atc_P17_1_5_8 | 0.01001        | 0.06426    | 0.06440    | 0.06362    | 0.06478    |
| Atc_P17_4_5_5 | -0.08960       | 0.06448    | 0.06461    | 0.07055    | 0.07067    |

| Name          | $\Delta_{def}$ | Symmetric  |            | General    |            |
|---------------|----------------|------------|------------|------------|------------|
|               |                | $\Delta_l$ | $\Delta_a$ | $\Delta_l$ | $\Delta_a$ |
| Atc_P14_3_4_4 | -0.16628       | 0.06752    | 0.06767    | 0.08032    | 0.07994    |
| Atc_P11_2_3_3 | -0.08673       | 0.06818    | 0.06819    | 0.07527    | 0.07437    |
| Atc_P15_3_3_6 | -0.02020       | 0.06847    | 0.06848    | 0.06987    | 0.07017    |
| Atc_P8_1_2_2  | -0.09061       | 0.03754    | 0.07212    | 0.07456    | 0.07896    |
| Atc_P12_2_3_4 | 0.08793        | 0.07881    | 0.07881    | 0.07217    | 0.08468    |
| Atc_P15_3_2_7 | 0.23183        | 0.08184    | 0.08207    | 0.06724    | 0.06502    |
| Atc_P14_3_2_6 | -0.01452       | 0.08622    | 0.08626    | 0.08769    | 0.08752    |
| Atc_P14_3_3_5 | -0.05767       | 0.09096    | 0.09096    | 0.09636    | 0.09673    |

## 3.22 Ato

### 3.22.1 New

| Name          | Symmetric  |            |
|---------------|------------|------------|
|               | $\Delta_l$ | $\Delta_a$ |
| Ato_P14_2_2_7 | 0.05073    | 0.05080    |
| Ato_P16_3_2_8 | 0.05528    | 0.01565    |
| Ato_P13_4_3_3 | 0.07883    | 0.07891    |
| Ato_P17_6_4_4 | 0.09074    | 0.09074    |

### 3.22.2 Comparison

| Name          | $\Delta_{def}$ | Symmetric  |            | General    |            |
|---------------|----------------|------------|------------|------------|------------|
|               |                | $\Delta_l$ | $\Delta_a$ | $\Delta_l$ | $\Delta_a$ |
| Ato_P15_3_4_5 | -0.00019       | 0.00110    | 0.00110    | 0.00110    | 0.00110    |
| Ato_P15_3_3_6 | 0.00141        | 0.00271    | 0.00271    | 0.00272    | 0.00271    |
| Ato_P11_2_2_4 | 0.00079        | 0.00372    | 0.00372    | 0.00372    | 0.00372    |
| Ato_P11_2_1_5 | 0.01745        | 0.00621    | 0.00253    | 0.00695    | 0.00249    |
| Ato_P15_3_2_7 | -0.00176       | 0.00628    | 0.00629    | 0.00629    | 0.00642    |
| Ato_P14_3_2_6 | -0.00997       | 0.01238    | 0.01240    | 0.01250    | 0.01257    |
| Ato_P17_4_2_8 | 0.00450        | 0.01451    | 0.01452    | 0.01499    | 0.01445    |
| Ato_P16_3_4_6 | 0.00140        | 0.01540    | 0.01541    | 0.01540    | 0.01539    |
| Ato_P13_2_4_4 | -0.01363       | 0.01550    | 0.01564    | 0.01580    | 0.01585    |
| Ato_P14_3_3_5 | 0.00051        | 0.01620    | 0.01622    | 0.01621    | 0.01621    |
| Ato_P16_3_3_7 | -0.00531       | 0.01708    | 0.01713    | 0.01717    | 0.01743    |
| Ato_P12_2_3_4 | 0.00192        | 0.01801    | 0.01802    | 0.01800    | 0.01799    |
| Ato_P17_4_3_7 | -0.00284       | 0.01915    | 0.01916    | 0.01922    | 0.01921    |
| Ato_P17_3_5_6 | -0.01972       | 0.02009    | 0.02010    | 0.02050    | 0.02050    |
| Ato_P12_2_2_5 | -0.00011       | 0.02121    | 0.02120    | 0.02121    | 0.02121    |
| Ato_P17_4_4_6 | -0.00226       | 0.02221    | 0.02223    | 0.02227    | 0.02228    |
| Ato_P15_4_4_4 | -0.02903       | 0.02413    | 0.02414    | 0.02484    | 0.02635    |
| Ato_P7_1_1_2  | 0.00348        | 0.02633    | 0.02634    | 0.02625    | 0.02625    |
| Ato_P17_3_4_7 | -0.00231       | 0.02642    | 0.02643    | 0.02648    | 0.02649    |
| Ato_P17_3_3_8 | 0.07307        | 0.02794    | 0.02795    | 0.02597    | 0.02912    |
| Ato_P12_3_3_3 | -0.01399       | 0.02842    | 0.02845    | 0.02882    | 0.03004    |
| Ato_P8_1_1_3  | 0.00177        | 0.02912    | 0.02911    | 0.02907    | 0.02907    |
| Ato_P10_2_1_4 | 0.00051        | 0.03095    | 0.03096    | 0.03094    | 0.03094    |
| Ato_P16_4_2_7 | 0.01895        | 0.03276    | 0.03279    | 0.03389    | 0.03217    |
| Ato_P9_2_2_2  | -0.21410       | 0.03490    | 0.03493    | 0.04327    | 0.04543    |
| Ato_P13_2_3_5 | -0.00020       | 0.03630    | 0.03631    | 0.03633    | 0.03632    |
| Ato_P13_3_2_5 | 0.00023        | 0.03729    | 0.03726    | 0.03728    | 0.03728    |
| Ato_P16_4_3_6 | -0.00040       | 0.03773    | 0.03773    | 0.03775    | 0.03775    |
| Ato_P13_2_2_6 | -0.00233       | 0.03870    | 0.03870    | 0.03884    | 0.03879    |
| Ato_P14_2_4_5 | 0.00154        | 0.03899    | 0.03903    | 0.03896    | 0.03897    |
| Ato_P15_2_5_5 | -0.02109       | 0.03879    | 0.03930    | 0.04016    | 0.04014    |
| Ato_P10_2_2_3 | 0.00120        | 0.03930    | 0.03932    | 0.03927    | 0.03927    |
| Ato_P16_4_4_5 | 0.00136        | 0.04275    | 0.04283    | 0.04276    | 0.04277    |
| Ato_P13_3_3_4 | 0.00130        | 0.04413    | 0.04412    | 0.04407    | 0.04407    |
| Ato_P6_1_1_1  | -0.09985       | 0.04665    | 0.04666    | 0.05155    | 0.05162    |

| Name          | $\Delta_{def}$ | Symmetric  |            | General    |            |
|---------------|----------------|------------|------------|------------|------------|
|               |                | $\Delta_l$ | $\Delta_a$ | $\Delta_l$ | $\Delta_a$ |
| Ato_P16_2_5_6 | -0.01847       | 0.04897    | 0.04903    | 0.04995    | 0.04994    |
| Ato_P14_2_3_6 | -0.00644       | 0.04916    | 0.04921    | 0.04948    | 0.04953    |
| Ato_P15_2_4_6 | 0.00121        | 0.05543    | 0.05543    | 0.05536    | 0.05537    |
| Ato_P15_4_2_6 | 0.00057        | 0.05605    | 0.05601    | 0.05602    | 0.05603    |
| Ato_P17_2_6_6 | 0.50472        | 0.05643    | 0.05644    | 0.03369    | 0.05754    |
| Ato_P9_1_2_3  | 0.00413        | 0.05648    | 0.05648    | 0.05625    | 0.05625    |
| Ato_P15_2_3_7 | -0.00446       | 0.05799    | 0.05801    | 0.05825    | 0.05874    |
| Ato_P16_5_4_4 | -0.05905       | 0.05924    | 0.05934    | 0.06284    | 0.06296    |
| Ato_P12_3_1_5 | -0.00018       | 0.06017    | 0.06019    | 0.06020    | 0.06020    |
| Ato_P10_1_3_3 | -0.01886       | 0.01235    | 0.06250    | 0.06368    | 0.06369    |
| Ato_P17_2_5_7 | -0.00110       | 0.06276    | 0.06280    | 0.06336    | 0.06287    |
| Ato_P15_4_3_5 | -0.00022       | 0.06263    | 0.06287    | 0.06289    | 0.06288    |
| Ato_P16_2_4_7 | 0.00499        | 0.06321    | 0.06328    | 0.06290    | 0.06318    |
| Ato_P17_5_2_7 | -0.00098       | 0.06752    | 0.06753    | 0.06761    | 0.06760    |
| Ato_P9_1_1_4  | 0.00083        | 0.06853    | 0.06864    | 0.06858    | 0.06858    |
| Ato_P12_3_2_4 | -0.00117       | 0.06982    | 0.06993    | 0.07000    | 0.07001    |
| Ato_P17_2_4_8 | 0.33678        | 0.07258    | 0.07269    | 0.05166    | 0.07376    |
| Ato_P17_5_3_6 | -0.00545       | 0.07347    | 0.07346    | 0.07387    | 0.07386    |
| Ato_P9_2_1_3  | 0.00046        | 0.07889    | 0.07891    | 0.07887    | 0.07887    |
| Ato_P11_1_3_4 | -0.01237       | 0.08500    | 0.08501    | 0.08606    | 0.08607    |
| Ato_P14_4_2_5 | -0.00275       | 0.08516    | 0.08525    | 0.08549    | 0.08548    |
| Ato_P14_4_1_6 | 0.24388        | 0.06295    | 0.08611    | 0.04927    | 0.09357    |
| Ato_P10_1_2_4 | -0.00044       | 0.08607    | 0.08616    | 0.08620    | 0.08620    |
| Ato_P17_5_4_5 | -0.00390       | 0.08664    | 0.08668    | 0.08698    | 0.08710    |
| Ato_P16_5_2_6 | -0.00461       | 0.09415    | 0.09430    | 0.09475    | 0.09474    |

### 3.23 Atd

#### 3.23.1 New

| Name          | Symmetric  |            |
|---------------|------------|------------|
|               | $\Delta_l$ | $\Delta_a$ |
| Atd_P12_1_2_6 | 0.00433    | 0.00433    |
| Atd_P16_2_3_8 | 0.01345    | 0.01352    |
| Atd_P14_1_3_7 | 0.03181    | 0.03187    |
| Atd_P14_2_2_7 | 0.03498    | 0.03500    |
| Atd_P16_1_6_6 | 0.00292    | 0.04762    |
| Atd_P15_3_3_6 | 0.06773    | 0.06782    |
| Atd_P17_4_5_5 | 0.07656    | 0.07656    |
| Atd_P16_1_4_8 | 0.08039    | 0.08056    |
| Atd_P10_1_1_5 | 0.08162    | 0.08159    |
| Atd_P17_4_3_7 | 0.08244    | 0.08252    |
| Atd_P16_3_2_8 | 0.09821    | 0.09821    |
| Atd_P8_1_2_2  | 0.04650    | 0.09839    |

### 3.23.2 Comparison

| Name          | $\Delta_{def}$ | Symmetric  |            | General    |            |
|---------------|----------------|------------|------------|------------|------------|
|               |                | $\Delta_l$ | $\Delta_a$ | $\Delta_l$ | $\Delta_a$ |
| Atd_P17_2_6_6 | -1.96583       | 0.00006    | 0.00020    | 0.02306    | 0.02332    |
| Atd_P12_1_3_5 | -0.03669       | 0.00345    | 0.00346    | 0.00358    | 0.00359    |
| Atd_P17_2_4_8 | -1.27665       | 0.00516    | 0.00518    | 0.02339    | 0.02424    |
| Atd_P17_2_5_7 | -1.42566       | 0.00536    | 0.00539    | 0.03242    | 0.03215    |
| Atd_P16_2_5_6 | -0.60152       | 0.01382    | 0.01383    | 0.02570    | 0.02623    |
| Atd_P16_2_4_7 | -0.68883       | 0.01385    | 0.01392    | 0.02841    | 0.02980    |
| Atd_P11_1_2_5 | 1.98635        | 0.01460    | 0.01468    | 0.00005    | 0.01493    |
| Atd_P11_1_3_4 | 0.05764        | 0.01512    | 0.01516    | 0.01427    | 0.01538    |
| Atd_P13_1_4_5 | 1.98904        | 0.01820    | 0.01820    | 0.00005    | 0.01868    |
| Atd_P15_2_5_5 | -0.59325       | 0.01855    | 0.01855    | 0.03419    | 0.03613    |
| Atd_P13_1_3_6 | -0.00885       | 0.01889    | 0.01890    | 0.01906    | 0.01907    |
| Atd_P15_2_3_7 | -0.14759       | 0.02343    | 0.02371    | 0.02716    | 0.03586    |
| Atd_P15_2_4_6 | -0.22457       | 0.02370    | 0.02395    | 0.02969    | 0.03223    |
| Atd_P14_1_5_5 | -0.03161       | 0.00213    | 0.02778    | 0.02757    | 0.02867    |
| Atd_P10_1_3_3 | -0.02458       | 0.00567    | 0.02974    | 0.02491    | 0.03048    |
| Atd_P14_1_4_6 | 0.29454        | 0.03115    | 0.03116    | 0.02315    | 0.03161    |
| Atd_P14_2_4_5 | -0.26399       | 0.03531    | 0.03533    | 0.04605    | 0.04880    |
| Atd_P14_2_3_6 | 0.04320        | 0.03551    | 0.03558    | 0.03401    | 0.03738    |
| Atd_P10_1_2_4 | 0.08648        | 0.03820    | 0.03825    | 0.03503    | 0.03861    |
| Atd_P17_3_3_8 | -0.44467       | 0.03922    | 0.03922    | 0.06164    | 0.07179    |
| Atd_P17_3_4_7 | -0.49996       | 0.04002    | 0.04001    | 0.06669    | 0.07003    |
| Atd_P15_1_5_6 | 0.19354        | 0.04086    | 0.04091    | 0.03365    | 0.04193    |
| Atd_P15_1_4_7 | 0.34690        | 0.04198    | 0.04212    | 0.02957    | 0.04265    |
| Atd_P13_2_4_4 | -0.06503       | 0.04383    | 0.04385    | 0.04678    | 0.04700    |
| Atd_P17_3_5_6 | -0.33440       | 0.04388    | 0.04400    | 0.06150    | 0.06297    |
| Atd_P16_3_5_5 | -0.28790       | 0.04655    | 0.04661    | 0.06220    | 0.06323    |
| Atd_P13_2_2_6 | -0.00796       | 0.04907    | 0.04924    | 0.04946    | 0.04968    |
| Atd_P13_2_3_5 | 0.03098        | 0.04954    | 0.04958    | 0.04803    | 0.05026    |
| Atd_P16_1_5_7 | 0.24509        | 0.05072    | 0.05081    | 0.03965    | 0.05141    |
| Atd_P16_3_3_7 | -0.17823       | 0.05195    | 0.05197    | 0.06212    | 0.06382    |
| Atd_P16_3_4_6 | -0.11725       | 0.05282    | 0.05299    | 0.05951    | 0.05959    |
| Atd_P17_1_6_7 | 0.05445        | 0.05717    | 0.05718    | 0.05414    | 0.05845    |
| Atd_P17_1_5_8 | 0.02919        | 0.05897    | 0.05908    | 0.05727    | 0.05946    |
| Atd_P12_2_2_5 | -0.01048       | 0.06614    | 0.06633    | 0.06710    | 0.06703    |
| Atd_P9_1_1_4  | 0.12351        | 0.06719    | 0.06731    | 0.05937    | 0.06815    |

| Name          | $\Delta_{def}$ | Symmetric  |            | General    |            |
|---------------|----------------|------------|------------|------------|------------|
|               |                | $\Delta_l$ | $\Delta_a$ | $\Delta_l$ | $\Delta_a$ |
| Atd_P9_1_2_3  | 0.05266        | 0.06812    | 0.06814    | 0.06462    | 0.06880    |
| Atd_P12_2_3_4 | 0.01000        | 0.06814    | 0.06816    | 0.06746    | 0.06991    |
| Atd_P15_3_4_5 | -0.10843       | 0.07270    | 0.07270    | 0.08104    | 0.08414    |
| Atd_P15_3_2_7 | 0.26139        | 0.08062    | 0.08069    | 0.06198    | 0.08318    |
| Atd_P14_3_4_4 | -0.12785       | 0.08123    | 0.08131    | 0.09233    | 0.09443    |
| Atd_P11_2_3_3 | -0.07757       | 0.08435    | 0.08434    | 0.09116    | 0.09203    |
| Atd_P14_3_2_6 | -0.04066       | 0.08734    | 0.08745    | 0.09341    | 0.09108    |
| Atd_P14_3_3_5 | -0.07275       | 0.08847    | 0.08847    | 0.09515    | 0.09520    |
| Atd_P11_2_1_5 | -0.00907       | 0.09024    | 0.09026    | 0.09111    | 0.09108    |
| Atd_P11_2_2_4 | -0.00850       | 0.09187    | 0.09187    | 0.09265    | 0.09636    |

### 3.24 Ati

#### 3.24.1 New

| Name          | Symmetric  |            |
|---------------|------------|------------|
|               | $\Delta_l$ | $\Delta_a$ |
| Ati_P17_4_3_7 | 0.01279    | 0.01280    |
| Ati_P16_3_4_6 | 0.04732    | 0.04740    |
| Ati_P16_5_3_5 | 0.05919    | 0.05925    |
| Ati_P14_2_4_5 | 0.07405    | 0.07397    |
| Ati_P17_6_4_4 | 0.07454    | 0.07455    |
| Ati_P14_2_2_7 | 0.08414    | 0.08112    |
| Ati_P15_5_2_5 | 0.08567    | 0.08567    |
| Ati_P8_2_1_2  | 0.09251    | 0.09255    |
| Ati_P17_6_3_5 | 0.09300    | 0.09314    |
| Ati_P16_2_3_8 | 0.09890    | 0.09900    |



### 3.24.2 Comparison

| Name          | $\Delta_{def}$ | Symmetric  |            | General    |            |
|---------------|----------------|------------|------------|------------|------------|
|               |                | $\Delta_l$ | $\Delta_a$ | $\Delta_l$ | $\Delta_a$ |
| Ati_P16_4_2_7 | -0.48944       | 0.00042    | 0.00042    | 0.00070    | 0.00075    |
| Ati_P13_3_3_4 | -0.02148       | 0.00184    | 0.00184    | 0.00188    | 0.00190    |
| Ati_P16_4_3_6 | -0.02358       | 0.00189    | 0.00189    | 0.00194    | 0.00194    |
| Ati_P16_4_4_5 | -0.01865       | 0.00270    | 0.00270    | 0.00275    | 0.00275    |
| Ati_P13_3_2_5 | -0.01213       | 0.00289    | 0.00290    | 0.00293    | 0.00303    |
| Ati_P17_4_5_5 | -0.49566       | 0.00413    | 0.00414    | 0.00686    | 0.00686    |
| Ati_P15_4_4_4 | 0.18120        | 0.00150    | 0.01036    | 0.00864    | 0.00864    |
| Ati_P10_2_2_3 | 0.00105        | 0.01141    | 0.01141    | 0.01140    | 0.01140    |
| Ati_P14_3_4_4 | -0.00204       | 0.01158    | 0.01160    | 0.01162    | 0.01162    |
| Ati_P17_4_4_6 | -0.02930       | 0.01239    | 0.01241    | 0.01276    | 0.01279    |
| Ati_P12_3_3_3 | 0.22350        | 0.00249    | 0.01254    | 0.01002    | 0.01002    |
| Ati_P10_2_1_4 | -0.00148       | 0.01315    | 0.01315    | 0.01317    | 0.01317    |
| Ati_P9_2_2_2  | 0.20493        | 0.00475    | 0.01556    | 0.01267    | 0.01267    |
| Ati_P6_1_1_1  | 0.21603        | 0.01140    | 0.01892    | 0.01440    | 0.01523    |
| Ati_P15_4_2_6 | -0.00075       | 0.01941    | 0.01940    | 0.01942    | 0.01942    |
| Ati_P12_3_1_5 | -0.01710       | 0.02111    | 0.02116    | 0.02268    | 0.02152    |
| Ati_P15_4_3_5 | -0.00085       | 0.02132    | 0.02134    | 0.02136    | 0.02136    |
| Ati_P14_3_3_5 | -0.00029       | 0.02206    | 0.02207    | 0.02208    | 0.02208    |
| Ati_P14_3_2_6 | -0.02056       | 0.02267    | 0.02266    | 0.02314    | 0.02351    |
| Ati_P12_3_2_4 | -0.00442       | 0.02462    | 0.02461    | 0.02473    | 0.02474    |
| Ati_P11_2_3_3 | -0.02151       | 0.02624    | 0.02624    | 0.02684    | 0.02681    |
| Ati_P9_2_1_3  | 0.00022        | 0.02827    | 0.02827    | 0.02826    | 0.02826    |
| Ati_P17_5_2_7 | -0.01251       | 0.03366    | 0.03371    | 0.03419    | 0.03413    |
| Ati_P16_3_5_5 | -0.02517       | 0.03448    | 0.03459    | 0.03548    | 0.03547    |
| Ati_P17_5_3_6 | -0.01244       | 0.03600    | 0.03601    | 0.03649    | 0.03646    |
| Ati_P15_3_3_6 | -0.00162       | 0.03639    | 0.03640    | 0.03645    | 0.03646    |
| Ati_P15_3_4_5 | 0.00204        | 0.03642    | 0.03643    | 0.03636    | 0.03636    |
| Ati_P15_3_2_7 | 0.05687        | 0.03672    | 0.03676    | 0.03469    | 0.03952    |
| Ati_P7_1_1_2  | 0.00246        | 0.03739    | 0.03739    | 0.03731    | 0.03730    |
| Ati_P17_4_2_8 | 0.02609        | 0.03836    | 0.00911    | 0.04580    | 0.00888    |
| Ati_P11_2_2_4 | -0.00027       | 0.03981    | 0.03981    | 0.03982    | 0.03982    |
| Ati_P17_5_4_5 | -0.01050       | 0.04012    | 0.04012    | 0.04055    | 0.04054    |
| Ati_P16_5_4_4 | -0.05992       | 0.04318    | 0.04322    | 0.04589    | 0.04589    |
| Ati_P14_4_2_5 | -0.00002       | 0.04426    | 0.04429    | 0.04428    | 0.04429    |
| Ati_P16_3_3_7 | 0.04105        | 0.04654    | 0.04653    | 0.04467    | 0.05256    |

| Name          | $\Delta_{def}$ | Symmetric  |            | General    |            |
|---------------|----------------|------------|------------|------------|------------|
|               |                | $\Delta_l$ | $\Delta_a$ | $\Delta_l$ | $\Delta_a$ |
| Ati_P14_4_3_4 | -0.00016       | 0.04899    | 0.04900    | 0.04900    | 0.04901    |
| Ati_P17_3_5_6 | -0.02434       | 0.04971    | 0.04969    | 0.05093    | 0.05094    |
| Ati_P17_3_3_8 | 0.07437        | 0.05365    | 0.05367    | 0.04980    | 0.06382    |
| Ati_P17_3_4_7 | -0.01477       | 0.05432    | 0.05435    | 0.05513    | 0.05519    |
| Ati_P16_5_2_6 | -0.00144       | 0.05654    | 0.05657    | 0.05664    | 0.05665    |
| Ati_P13_2_4_4 | -0.04168       | 0.05667    | 0.05680    | 0.05928    | 0.05922    |
| Ati_P11_3_1_4 | -0.00098       | 0.05788    | 0.05791    | 0.05794    | 0.05802    |
| Ati_P12_2_2_5 | -0.00863       | 0.05838    | 0.05841    | 0.05889    | 0.05931    |
| Ati_P12_2_3_4 | -0.00355       | 0.05925    | 0.05926    | 0.05947    | 0.05947    |
| Ati_P13_4_3_3 | -0.07212       | 0.06014    | 0.06016    | 0.06464    | 0.06471    |
| Ati_P11_3_2_3 | -0.09904       | 0.06362    | 0.06366    | 0.07025    | 0.07068    |
| Ati_P8_1_2_2  | -0.00005       | 0.05229    | 0.06667    | 0.06666    | 0.06667    |
| Ati_P13_2_2_6 | 0.01032        | 0.07017    | 0.07033    | 0.06945    | 0.07283    |
| Ati_P13_2_3_5 | -0.00286       | 0.07169    | 0.07184    | 0.07204    | 0.07205    |
| Ati_P13_4_1_5 | -0.00095       | 0.07356    | 0.07355    | 0.07363    | 0.07366    |
| Ati_P13_4_2_4 | -0.09727       | 0.07701    | 0.07701    | 0.08553    | 0.08488    |
| Ati_P14_2_3_6 | 0.05066        | 0.07902    | 0.07908    | 0.07512    | 0.08203    |
| Ati_P15_2_5_5 | -0.03634       | 0.07842    | 0.07911    | 0.08185    | 0.08204    |
| Ati_P15_5_1_6 | 0.33203        | 0.08204    | 0.08204    | 0.05868    | 0.09275    |
| Ati_P8_1_1_3  | -0.12812       | 0.08270    | 0.08277    | 0.09977    | 0.09410    |
| Ati_P11_2_1_5 | 0.01397        | 0.08628    | 0.03390    | 0.09833    | 0.03343    |
| Ati_P15_2_4_6 | -0.00320       | 0.08667    | 0.08674    | 0.08698    | 0.08702    |
| Ati_P16_2_5_6 | 0.10377        | 0.08802    | 0.08813    | 0.07934    | 0.08983    |
| Ati_P17_6_2_6 | -0.00625       | 0.08960    | 0.08959    | 0.09016    | 0.09016    |
| Ati_P15_2_3_7 | 0.22448        | 0.08950    | 0.08965    | 0.07144    | 0.09333    |
| Ati_P10_3_2_2 | -0.05467       | 0.09130    | 0.09136    | 0.09784    | 0.09650    |
| Ati_P17_2_6_6 | 0.23579        | 0.09491    | 0.09525    | 0.07489    | 0.09777    |
| Ati_P15_5_3_4 | -0.00063       | 0.09528    | 0.09528    | 0.09544    | 0.09534    |
| Ati_P16_2_4_7 | -0.00501       | 0.09668    | 0.09671    | 0.09717    | 0.09725    |

## 3.25 Aco

### 3.25.1 New

| Name            | Symmetric  |            |
|-----------------|------------|------------|
|                 | $\Delta_l$ | $\Delta_a$ |
| Aco_P13_1_2_1_5 | 0.05580    | 0.05589    |
| Aco_P10_1_1_3_1 | 0.07504    | 0.07508    |
| Aco_P17_1_3_6_3 | 0.07844    | 0.07850    |
| Aco_P14_1_2_2_5 | 0.08012    | 0.06545    |
| Aco_P11_2_1_3_1 | 0.07955    | 0.08642    |
| Aco_P17_1_3_2_7 | 0.09145    | 0.09159    |
| Aco_P17_1_3_5_4 | 0.09205    | 0.09202    |

### 3.25.2 Comparison

| Name            | $\Delta_{def}$ | Symmetric  |            | General    |            |
|-----------------|----------------|------------|------------|------------|------------|
|                 |                | $\Delta_l$ | $\Delta_a$ | $\Delta_l$ | $\Delta_a$ |
| Aco_P17_2_4_3_4 | -0.00801       | 0.00000    | 0.00083    | 0.00005    | 0.00084    |
| Aco_P15_2_3_2_4 | 0.00243        | 0.00282    | 0.00282    | 0.00281    | 0.00282    |
| Aco_P10_1_2_1_2 | 0.86759        | 0.00003    | 0.00511    | 0.00001    | 0.00510    |
| Aco_P16_2_4_2_4 | 0.00009        | 0.00000    | 0.00641    | 0.00001    | 0.00641    |
| Aco_P16_2_3_2_5 | 0.00061        | 0.00754    | 0.00754    | 0.00754    | 0.00754    |
| Aco_P14_2_2_2_4 | 0.00059        | 0.01284    | 0.01285    | 0.01284    | 0.01284    |
| Aco_P17_2_3_5_3 | -0.25787       | 0.01424    | 0.01424    | 0.02244    | 0.01846    |
| Aco_P14_2_3_2_3 | 0.00076        | 0.00000    | 0.01429    | 0.00002    | 0.01428    |
| Aco_P17_2_4_2_5 | -0.00004       | 0.01477    | 0.01490    | 0.01490    | 0.01490    |
| Aco_P11_1_2_2_2 | -0.00190       | 0.00001    | 0.01490    | 0.00041    | 0.01493    |
| Aco_P16_2_3_4_3 | -0.00146       | 0.00004    | 0.01577    | 0.00093    | 0.01579    |
| Aco_P17_2_3_2_6 | -0.00024       | 0.01702    | 0.01708    | 0.01708    | 0.01708    |
| Aco_P11_1_2_1_3 | 0.02129        | 0.01798    | 0.01807    | 0.01760    | 0.01806    |
| Aco_P17_3_3_3_4 | -0.00210       | 0.02205    | 0.02212    | 0.02216    | 0.02217    |
| Aco_P15_2_3_3_3 | -0.00283       | 0.00000    | 0.02213    | 0.00021    | 0.02219    |
| Aco_P13_1_3_2_3 | -0.00158       | 0.00001    | 0.02353    | 0.00021    | 0.02357    |
| Aco_P13_2_2_2_3 | 0.00030        | 0.02681    | 0.02699    | 0.02698    | 0.02698    |
| Aco_P14_1_3_3_3 | -0.00064       | 0.00000    | 0.02870    | 0.00051    | 0.02872    |
| Aco_P17_3_2_3_5 | -0.00072       | 0.02861    | 0.02872    | 0.02881    | 0.02874    |
| Aco_P16_3_3_3_3 | 1.13327        | 0.00014    | 0.03092    | 0.00004    | 0.03090    |
| Aco_P9_1_1_1_2  | 0.00154        | 0.03216    | 0.03217    | 0.03212    | 0.03212    |
| Aco_P12_1_3_1_3 | 0.00074        | 0.00001    | 0.03510    | 0.00008    | 0.03507    |
| Aco_P14_2_2_4_2 | -0.00808       | 0.01779    | 0.03704    | 0.01843    | 0.03734    |
| Aco_P12_1_2_1_4 | 0.00086        | 0.03807    | 0.03808    | 0.03805    | 0.03805    |
| Aco_P15_1_3_4_3 | 1.93753        | 0.00504    | 0.03846    | 0.00008    | 0.04042    |
| Aco_P16_2_3_3_4 | 0.00100        | 0.03876    | 0.03876    | 0.03872    | 0.03873    |
| Aco_P17_3_3_4_3 | 0.00175        | 0.03082    | 0.03894    | 0.03467    | 0.03887    |
| Aco_P16_3_2_3_4 | -0.00009       | 0.04041    | 0.04044    | 0.04044    | 0.04044    |
| Aco_P12_2_2_2_2 | 1.36761        | 0.00005    | 0.04328    | 0.00001    | 0.04326    |
| Aco_P17_2_3_3_5 | 0.00001        | 0.04348    | 0.04351    | 0.04350    | 0.04351    |
| Aco_P14_1_3_2_4 | 0.00067        | 0.04396    | 0.04396    | 0.04393    | 0.04393    |
| Aco_P16_1_3_5_3 | -0.03103       | 0.04508    | 0.04762    | 0.07624    | 0.04912    |
| Aco_P16_3_2_5_2 | -0.05230       | 0.02653    | 0.04765    | 0.04889    | 0.05021    |
| Aco_P13_1_3_1_4 | 0.00009        | 0.04162    | 0.05013    | 0.04229    | 0.05013    |
| Aco_P13_2_2_3_2 | 0.00941        | 0.02607    | 0.05066    | 0.02583    | 0.05066    |

| Name            | $\Delta_{def}$ | Symmetric  |            | General    |            |
|-----------------|----------------|------------|------------|------------|------------|
|                 |                | $\Delta_l$ | $\Delta_a$ | $\Delta_l$ | $\Delta_a$ |
| Aco_P16_1_4_3_4 | -0.00105       | 0.00002    | 0.05076    | 0.00043    | 0.05081    |
| Aco_P15_1_4_2_4 | -0.00144       | 0.00002    | 0.05123    | 0.00005    | 0.05130    |
| Aco_P16_2_2_3_5 | -0.00010       | 0.05207    | 0.05207    | 0.05209    | 0.05208    |
| Aco_P15_3_2_3_3 | -0.00071       | 0.05184    | 0.05229    | 0.05225    | 0.05233    |
| Aco_P17_2_3_4_4 | 0.00625        | 0.05324    | 0.05323    | 0.05291    | 0.05290    |
| Aco_P17_1_4_4_4 | -0.00103       | 0.00001    | 0.05582    | 0.00455    | 0.05588    |
| Aco_P13_1_2_4_2 | -0.23921       | 0.05692    | 0.05692    | 0.07239    | 0.07283    |
| Aco_P15_2_2_5_2 | 0.00005        | 0.05710    | 0.05713    | 0.05710    | 0.05715    |
| Aco_P17_3_2_6_2 | -0.23904       | 0.05726    | 0.05715    | 0.07281    | 0.07289    |
| Aco_P15_1_3_3_4 | 0.00078        | 0.05878    | 0.05880    | 0.05875    | 0.05875    |
| Aco_P17_1_4_3_5 | -0.00227       | 0.06156    | 0.06157    | 0.06171    | 0.06171    |
| Aco_P13_1_2_2_4 | 0.00036        | 0.06165    | 0.06165    | 0.06163    | 0.06163    |
| Aco_P14_1_4_1_4 | 0.00047        | 0.00005    | 0.06190    | 0.00013    | 0.06187    |
| Aco_P15_1_3_2_5 | -0.00101       | 0.06298    | 0.06300    | 0.06306    | 0.06306    |
| Aco_P14_1_3_1_5 | 0.00050        | 0.06350    | 0.06363    | 0.06359    | 0.06360    |
| Aco_P12_2_1_2_3 | 0.00214        | 0.04239    | 0.06371    | 0.04266    | 0.06357    |
| Aco_P12_1_2_2_3 | 0.00198        | 0.06450    | 0.06452    | 0.06439    | 0.06439    |
| Aco_P16_1_4_2_5 | -0.00064       | 0.02738    | 0.06477    | 0.03530    | 0.06481    |
| Aco_P15_3_2_4_2 | -0.00006       | 0.06695    | 0.06701    | 0.06699    | 0.06701    |
| Aco_P16_1_3_4_4 | -0.06075       | 0.06735    | 0.06739    | 0.07165    | 0.07161    |
| Aco_P15_2_2_3_4 | 0.00077        | 0.06908    | 0.06908    | 0.06903    | 0.06903    |
| Aco_P14_3_2_3_2 | 0.54388        | 0.00002    | 0.06986    | 0.00001    | 0.07290    |
| Aco_P9_1_1_2_1  | 0.04655        | 0.01384    | 0.07115    | 0.01321    | 0.07115    |
| Aco_P17_1_5_2_5 | -0.00238       | 0.00001    | 0.07138    | 0.00004    | 0.07155    |
| Aco_P8_1_1_1_1  | 0.00037        | 0.00000    | 0.07212    | 0.00001    | 0.07209    |
| Aco_P15_1_4_1_5 | 0.00032        | 0.04649    | 0.07245    | 0.06574    | 0.07243    |
| Aco_P14_2_2_3_3 | 0.00370        | 0.07351    | 0.07357    | 0.07324    | 0.07345    |
| Aco_P17_3_2_4_4 | 0.00014        | 0.07600    | 0.07604    | 0.07619    | 0.07603    |
| Aco_P15_1_3_1_6 | 0.00037        | 0.07600    | 0.07613    | 0.07605    | 0.07610    |
| Aco_P17_4_2_4_3 | 0.07407        | 0.01434    | 0.07763    | 0.07139    | 0.07209    |
| Aco_P17_1_4_2_6 | 0.00022        | 0.07786    | 0.07794    | 0.07784    | 0.07813    |
| Aco_P16_1_3_2_6 | -0.00017       | 0.07880    | 0.07897    | 0.07899    | 0.07898    |
| Aco_P16_3_2_4_3 | 0.00127        | 0.07969    | 0.07971    | 0.07960    | 0.07961    |
| Aco_P16_1_5_1_5 | 0.00029        | 0.00025    | 0.08104    | 0.00029    | 0.08102    |
| Aco_P16_1_4_1_6 | -0.00021       | 0.08175    | 0.08199    | 0.08200    | 0.08201    |

| Name            | $\Delta_{def}$ | Symmetric  |            | General    |            |
|-----------------|----------------|------------|------------|------------|------------|
|                 |                | $\Delta_l$ | $\Delta_a$ | $\Delta_l$ | $\Delta_a$ |
| Aco_P17_4_2_5_2 | -0.00024       | 0.08201    | 0.08209    | 0.08212    | 0.08211    |
| Aco_P17_3_2_5_3 | 0.03310        | 0.08378    | 0.08373    | 0.08105    | 0.08106    |
| Aco_P15_2_2_4_3 | 0.05587        | 0.08419    | 0.08421    | 0.07965    | 0.07963    |
| Aco_P17_1_3_3_6 | 0.00142        | 0.08612    | 0.08620    | 0.08609    | 0.08608    |
| Aco_P11_2_1_2_2 | 0.00144        | 0.08661    | 0.08703    | 0.08688    | 0.08690    |
| Aco_P16_1_3_1_7 | 0.00035        | 0.08755    | 0.08777    | 0.08781    | 0.08774    |
| Aco_P16_1_3_3_5 | 0.00084        | 0.08809    | 0.08806    | 0.08802    | 0.08805    |
| Aco_P16_4_2_4_2 | -0.09598       | 0.00011    | 0.08884    | 0.09766    | 0.09780    |
| Aco_P17_1_5_1_6 | -0.00050       | 0.04825    | 0.08886    | 0.04985    | 0.08890    |
| Aco_P13_1_2_3_3 | 0.00685        | 0.08946    | 0.08945    | 0.08885    | 0.08887    |
| Aco_P17_1_4_1_7 | -0.00060       | 0.09085    | 0.09118    | 0.09117    | 0.09123    |
| Aco_P11_1_1_2_3 | 0.00035        | 0.09382    | 0.09394    | 0.09391    | 0.09391    |
| Aco_P16_2_2_6_2 | -0.03023       | 0.09502    | 0.09502    | 0.09794    | 0.09794    |
| Aco_P17_2_2_4_5 | -0.00005       | 0.09642    | 0.09652    | 0.09652    | 0.09652    |

### 3.25.3 Regular Extra:

| Name            | $\Delta_{def}$ | Symmetric  |            | General    |            |
|-----------------|----------------|------------|------------|------------|------------|
|                 |                | $\Delta_l$ | $\Delta_a$ | $\Delta_l$ | $\Delta_a$ |
| Aco_P10_1_1_1_3 | 0.00000        | 0.00000    | 0.00000    | 0          | 0          |
| Aco_P15_2_2_2_5 | 0.00000        | 0.00000    | 0.00000    | 0          | 0          |
| Aco_P20_3_3_3_7 | 0.00000        | 0.00000    | 0.00000    | 0          | 0          |

## 3.26 Aid

### 3.26.1 Comparison

| Name            | $\Delta_{def}$ | Symmetric  |            | General    |            |
|-----------------|----------------|------------|------------|------------|------------|
|                 |                | $\Delta_l$ | $\Delta_a$ | $\Delta_l$ | $\Delta_a$ |
| Aid_P16_2_4_2_4 | 0.00042        | 0.00000    | 0.00860    | 0.00001    | 0.00860    |
| Aid_P12_1_3_1_3 | -0.00002       | 0.00000    | 0.01145    | 0.00001    | 0.01145    |
| Aid_P14_2_3_2_3 | 0.00022        | 0.00000    | 0.02962    | 0.00002    | 0.02961    |
| Aid_P10_1_2_1_2 | 0.26154        | 0.00001    | 0.02974    | 0.00001    | 0.02974    |
| Aid_P14_1_4_1_4 | 0.54384        | 0.00003    | 0.03891    | 0.00002    | 0.03891    |
| Aid_P16_3_3_3_3 | -0.00090       | 0.00000    | 0.04218    | 0.00002    | 0.04222    |
| Aid_P16_1_5_1_5 | 0.50231        | 0.00007    | 0.05852    | 0.00004    | 0.05853    |
| Aid_P12_2_2_2_2 | -0.00021       | 0.00000    | 0.05904    | 0.00001    | 0.05905    |
| Aid_P14_3_2_3_2 | 1.43672        | 0.00006    | 0.08517    | 0.00001    | 0.08542    |
| Aid_P8_1_1_1_1  | 1.42010        | 0.00006    | 0.09839    | 0.00001    | 0.09840    |

## 3.27 Arcd

### 3.27.1 Missing

| Name             | General    |            |
|------------------|------------|------------|
|                  | $\Delta_l$ | $\Delta_a$ |
| Arcd_P13_1_2_3_3 | 0.02083    | 0.02084    |
| Arcd_P13_1_2_4_2 | 0.06247    | 0.06263    |
| Arcd_P13_2_1_4_2 | 0.07867    | 0.07868    |
| Arcd_P14_2_2_4_2 | 0.01037    | 0.03718    |
| Arcd_P15_3_2_4_2 | 0.03861    | 0.03891    |
| Arcd_P15_1_3_4_3 | 0.03874    | 0.03878    |
| Arcd_P15_1_2_4_4 | 0.04493    | 0.04493    |
| Arcd_P15_2_2_5_2 | 0.06311    | 0.06409    |
| Arcd_P15_2_1_5_3 | 0.08765    | 0.08764    |
| Arcd_P16_2_2_4_4 | 0.01237    | 0.01240    |
| Arcd_P16_2_2_5_3 | 0.06032    | 0.06032    |
| Arcd_P16_1_3_5_3 | 0.06140    | 0.06167    |
| Arcd_P17_3_3_3_4 | 0.09188    | 0.09215    |

### 3.27.2 New

| Name             | Symmetric  |            |
|------------------|------------|------------|
|                  | $\Delta_l$ | $\Delta_a$ |
| Arcd_P9_1_1_2_1  | 0.03025    | 0.03574    |
| Arcd_P17_1_3_6_3 | 0.07852    | 0.07852    |
| Arcd_P11_2_1_3_1 | 0.01180    | 0.08334    |
| Arcd_P17_4_3_3_3 | 0.09429    | 0.09439    |
| Arcd_P17_3_4_2_4 | 0.09736    | 0.09737    |



### 3.27.3 Comparison

| Name             | $\Delta_{def}$ | Symmetric  |            | General    |            |
|------------------|----------------|------------|------------|------------|------------|
|                  |                | $\Delta_l$ | $\Delta_a$ | $\Delta_l$ | $\Delta_a$ |
| Arcd_P16_2_3_4_3 | 0.06745        | 0.00653    | 0.00654    | 0.00610    | 0.00618    |
| Arcd_P17_2_3_5_3 | -0.08792       | 0.01421    | 0.01424    | 0.01552    | 0.01571    |
| Arcd_P17_2_3_4_4 | -0.00838       | 0.01759    | 0.01761    | 0.01774    | 0.01779    |
| Arcd_P15_2_2_4_3 | -0.00096       | 0.01717    | 0.02197    | 0.02198    | 0.02199    |
| Arcd_P12_1_1_3_3 | -0.00003       | 0.02340    | 0.02339    | 0.02340    | 0.02340    |
| Arcd_P13_2_2_3_2 | -0.14567       | 0.02457    | 0.02460    | 0.02903    | 0.02846    |
| Arcd_P11_1_2_2_2 | 0.00008        | 0.02574    | 0.02576    | 0.02577    | 0.02576    |
| Arcd_P17_3_3_4_3 | -0.06984       | 0.02660    | 0.02661    | 0.02853    | 0.02858    |
| Arcd_P15_2_3_3_3 | -0.14413       | 0.02758    | 0.02758    | 0.03186    | 0.03199    |
| Arcd_P17_2_2_4_5 | 0.01607        | 0.03278    | 0.00985    | 0.03474    | 0.00969    |
| Arcd_P14_1_2_3_4 | -0.00075       | 0.00001    | 0.03368    | 0.00052    | 0.03371    |
| Arcd_P10_1_1_2_2 | -0.00118       | 0.03586    | 0.03592    | 0.03596    | 0.03596    |
| Arcd_P17_2_2_5_4 | -0.00410       | 0.03621    | 0.03623    | 0.03640    | 0.03638    |
| Arcd_P17_3_2_5_3 | -0.00450       | 0.03879    | 0.03894    | 0.03913    | 0.03912    |
| Arcd_P17_2_4_3_4 | -0.07059       | 0.04048    | 0.04061    | 0.04366    | 0.04358    |
| Arcd_P15_1_3_3_4 | 0.08528        | 0.03399    | 0.04447    | 0.03121    | 0.04450    |
| Arcd_P15_1_2_3_5 | -0.00210       | 0.04452    | 0.04454    | 0.04463    | 0.04463    |
| Arcd_P15_2_2_3_4 | 0.00139        | 0.04677    | 0.04676    | 0.04670    | 0.04682    |
| Arcd_P13_2_1_3_3 | 0.00082        | 0.04917    | 0.04918    | 0.04914    | 0.04914    |
| Arcd_P17_3_2_4_4 | -0.00430       | 0.04941    | 0.04944    | 0.04964    | 0.04965    |
| Arcd_P14_2_2_3_3 | 0.00002        | 0.05079    | 0.05079    | 0.05079    | 0.05080    |
| Arcd_P16_3_2_5_2 | 0.20286        | 0.05122    | 0.05195    | 0.04179    | 0.04826    |
| Arcd_P16_1_3_4_4 | -0.00073       | 0.00004    | 0.05216    | 0.00040    | 0.05220    |
| Arcd_P16_1_3_3_5 | -0.00077       | 0.00898    | 0.05336    | 0.00960    | 0.05340    |
| Arcd_P16_1_2_4_5 | -0.00078       | 0.05368    | 0.05403    | 0.05407    | 0.05407    |
| Arcd_P16_1_4_3_4 | -0.00160       | 0.05480    | 0.05479    | 0.05490    | 0.05488    |
| Arcd_P17_4_2_5_2 | -0.00346       | 0.03729    | 0.05560    | 0.04951    | 0.05579    |
| Arcd_P16_3_3_3_3 | -0.32211       | 0.05640    | 0.05645    | 0.07806    | 0.07814    |
| Arcd_P17_1_4_4_4 | -0.00956       | 0.00012    | 0.05697    | 0.00123    | 0.05752    |
| Arcd_P14_2_1_4_3 | 0.01629        | 0.03595    | 0.05698    | 0.03537    | 0.05699    |
| Arcd_P14_1_2_4_3 | 0.00082        | 0.05725    | 0.05724    | 0.05720    | 0.05720    |
| Arcd_P17_3_2_6_2 | -0.03900       | 0.05730    | 0.05734    | 0.05958    | 0.05964    |
| Arcd_P13_1_3_2_3 | -0.00043       | 0.03581    | 0.05763    | 0.05055    | 0.05765    |
| Arcd_P17_1_3_5_4 | -0.00589       | 0.05902    | 0.05903    | 0.05938    | 0.05938    |
| Arcd_P11_1_1_3_2 | 0.00079        | 0.06101    | 0.06105    | 0.06101    | 0.06100    |

| Name             | $\Delta_{def}$ | Symmetric  |            | General    |            |
|------------------|----------------|------------|------------|------------|------------|
|                  |                | $\Delta_l$ | $\Delta_a$ | $\Delta_l$ | $\Delta_a$ |
| Arcd_P17_1_3_4_5 | -0.00230       | 0.06102    | 0.06109    | 0.06117    | 0.06123    |
| Arcd_P16_2_3_3_4 | 0.00166        | 0.06108    | 0.06118    | 0.06109    | 0.06108    |
| Arcd_P17_1_3_3_6 | -0.00210       | 0.03709    | 0.06137    | 0.06147    | 0.06150    |
| Arcd_P17_1_4_3_5 | -0.00303       | 0.06198    | 0.06234    | 0.06247    | 0.06253    |
| Arcd_P12_2_1_3_2 | -0.00405       | 0.06321    | 0.06331    | 0.06353    | 0.06357    |
| Arcd_P17_2_3_3_5 | -0.00111       | 0.06336    | 0.06336    | 0.06343    | 0.06346    |
| Arcd_P16_3_2_4_3 | 0.00002        | 0.06364    | 0.06365    | 0.06364    | 0.06365    |
| Arcd_P12_1_2_2_3 | 0.00108        | 0.06577    | 0.06576    | 0.06570    | 0.06569    |
| Arcd_P14_1_3_3_3 | 1.34984        | 0.06662    | 0.06678    | 0.01293    | 0.03354    |
| Arcd_P16_1_2_5_4 | -0.00011       | 0.06739    | 0.06740    | 0.06740    | 0.06741    |
| Arcd_P12_2_2_2_2 | -0.36759       | 0.06742    | 0.06742    | 0.09790    | 0.09778    |
| Arcd_P14_2_3_2_3 | -0.16686       | 0.07417    | 0.07419    | 0.08773    | 0.08769    |
| Arcd_P11_1_1_2_3 | 0.00863        | 0.07502    | 0.03512    | 0.07438    | 0.03517    |
| Arcd_P10_1_1_3_1 | -0.11899       | 0.07493    | 0.07507    | 0.08449    | 0.08457    |
| Arcd_P13_1_2_2_4 | 0.00023        | 0.07522    | 0.07537    | 0.07536    | 0.07535    |
| Arcd_P15_3_1_4_3 | 0.04830        | 0.06659    | 0.07798    | 0.06345    | 0.07936    |
| Arcd_P14_1_3_2_4 | 0.00052        | 0.07930    | 0.07929    | 0.07926    | 0.07926    |
| Arcd_P14_3_2_3_2 | -0.05744       | 0.07938    | 0.07940    | 0.08529    | 0.08410    |
| Arcd_P13_1_1_4_3 | -0.00051       | 0.07963    | 0.07963    | 0.07967    | 0.07967    |
| Arcd_P15_1_4_2_4 | -0.00220       | 0.00014    | 0.08019    | 0.05049    | 0.08037    |
| Arcd_P16_3_2_3_4 | -0.00076       | 0.08274    | 0.08273    | 0.08280    | 0.08282    |
| Arcd_P16_4_2_4_2 | -0.02388       | 0.08498    | 0.08502    | 0.08707    | 0.08707    |
| Arcd_P16_3_1_5_3 | 0.17084        | 0.05075    | 0.08633    | 0.04276    | 0.08749    |
| Arcd_P16_2_4_2_4 | -0.09389       | 0.08806    | 0.08806    | 0.09674    | 0.09676    |
| Arcd_P15_1_3_2_5 | -0.00103       | 0.08827    | 0.08834    | 0.08843    | 0.08843    |
| Arcd_P16_1_4_2_5 | -0.00293       | 0.09153    | 0.09165    | 0.09190    | 0.09192    |
| Arcd_P14_3_1_4_2 | 0.00175        | 0.09126    | 0.09170    | 0.09155    | 0.09154    |
| Arcd_P14_2_2_2_4 | 0.00012        | 0.09472    | 0.09477    | 0.09475    | 0.09476    |
| Arcd_P17_2_4_2_5 | -0.02516       | 0.09630    | 0.09637    | 0.09883    | 0.09883    |
| Arcd_P17_1_5_2_5 | -0.00348       | 0.00000    | 0.09669    | 0.08279    | 0.09703    |
| Arcd_P16_1_3_2_6 | -0.00033       | 0.09785    | 0.09791    | 0.09790    | 0.09794    |
| Arcd_P17_1_2_6_4 | -0.00431       | 0.09917    | 0.09915    | 0.09960    | 0.09960    |

### 3.28 Arco

#### 3.28.1 Missing

| Name             | General    |            |
|------------------|------------|------------|
|                  | $\Delta_l$ | $\Delta_a$ |
| Arco_P17_2_3_5_3 | 0.01714    | 0.01711    |

#### 3.28.2 New

| Name             | Symmetric  |            |
|------------------|------------|------------|
|                  | $\Delta_l$ | $\Delta_a$ |
| Arco_P14_1_2_2_5 | 0.05298    | 0.05311    |
| Arco_P16_4_3_2_3 | 0.07024    | 0.07026    |
| Arco_P17_1_3_6_3 | 0.07844    | 0.07851    |
| Arco_P11_2_2_1_2 | 0.05503    | 0.08333    |
| Arco_P17_1_3_2_7 | 0.08575    | 0.07701    |
| Arco_P16_2_2_6_2 | 0.09503    | 0.09500    |

### 3.28.3 Comparison

| Name             | $\Delta_{def}$ | Symmetric  |            | General    |            |
|------------------|----------------|------------|------------|------------|------------|
|                  |                | $\Delta_l$ | $\Delta_a$ | $\Delta_l$ | $\Delta_a$ |
| Arco_P11_1_2_2_2 | 0.00065        | 0.00020    | 0.00109    | 0.00021    | 0.00109    |
| Arco_P15_2_3_3_3 | 0.02621        | 0.00441    | 0.00442    | 0.00430    | 0.00435    |
| Arco_P11_1_1_2_3 | 0.02022        | 0.00511    | 0.00277    | 0.00520    | 0.00271    |
| Arco_P16_2_3_4_3 | -0.00621       | 0.00001    | 0.01439    | 0.00017    | 0.01448    |
| Arco_P17_2_4_3_4 | -0.00835       | 0.00357    | 0.01452    | 0.00901    | 0.01464    |
| Arco_P17_2_2_4_5 | 0.00010        | 0.01724    | 0.01725    | 0.01725    | 0.01725    |
| Arco_P17_2_3_4_4 | 0.00056        | 0.01976    | 0.01976    | 0.01975    | 0.01976    |
| Arco_P12_1_2_2_3 | 0.00037        | 0.01990    | 0.01989    | 0.01989    | 0.01990    |
| Arco_P15_2_2_3_4 | -0.00018       | 0.02037    | 0.02040    | 0.02040    | 0.02040    |
| Arco_P16_2_3_3_4 | 0.00157        | 0.02197    | 0.02198    | 0.02194    | 0.02197    |
| Arco_P14_2_2_3_3 | -0.00092       | 0.02205    | 0.02598    | 0.02234    | 0.02600    |
| Arco_P17_3_3_4_3 | 0.04515        | 0.02715    | 0.02715    | 0.02595    | 0.02628    |
| Arco_P14_3_2_3_2 | -0.02492       | 0.00000    | 0.02778    | 0.02477    | 0.02848    |
| Arco_P14_2_3_2_3 | -0.00226       | 0.00724    | 0.02925    | 0.00749    | 0.02932    |
| Arco_P10_1_1_2_2 | 0.00114        | 0.02952    | 0.02956    | 0.02952    | 0.02953    |
| Arco_P14_1_3_3_3 | -0.00163       | 0.00001    | 0.03110    | 0.00009    | 0.03115    |
| Arco_P17_2_3_3_5 | 0.00079        | 0.03326    | 0.03332    | 0.03330    | 0.03329    |
| Arco_P13_1_3_2_3 | -0.00074       | 0.03136    | 0.03492    | 0.03348    | 0.03495    |
| Arco_P16_2_2_4_4 | 0.00017        | 0.03585    | 0.03587    | 0.03586    | 0.03586    |
| Arco_P17_3_2_4_4 | -0.00090       | 0.03665    | 0.03672    | 0.03675    | 0.03675    |
| Arco_P14_2_2_4_2 | -0.08800       | 0.01636    | 0.03704    | 0.04001    | 0.04045    |
| Arco_P13_2_2_3_2 | -0.03311       | 0.00001    | 0.03785    | 0.00006    | 0.03912    |
| Arco_P13_1_2_2_4 | -0.00008       | 0.03776    | 0.03785    | 0.03786    | 0.03785    |
| Arco_P15_1_3_4_3 | 0.47252        | 0.00505    | 0.03846    | 0.00312    | 0.03890    |
| Arco_P17_4_3_3_3 | -0.15105       | 0.03907    | 0.03913    | 0.04552    | 0.04552    |
| Arco_P15_3_3_2_3 | -0.30274       | 0.04324    | 0.04324    | 0.05866    | 0.05884    |
| Arco_P14_1_2_3_4 | -0.00074       | 0.04371    | 0.04381    | 0.04384    | 0.04384    |
| Arco_P16_3_2_4_3 | -0.00070       | 0.04390    | 0.04402    | 0.04402    | 0.04405    |
| Arco_P16_2_2_3_5 | 0.03782        | 0.04496    | 0.01745    | 0.04689    | 0.01680    |
| Arco_P14_1_3_2_4 | -0.00089       | 0.04706    | 0.04720    | 0.04722    | 0.04724    |
| Arco_P16_1_3_5_3 | -0.53127       | 0.04755    | 0.04762    | 0.08195    | 0.08211    |
| Arco_P16_4_2_4_2 | -0.06433       | 0.00043    | 0.04762    | 0.05081    | 0.05079    |
| Arco_P16_3_2_5_2 | -0.05271       | 0.02780    | 0.04765    | 0.05012    | 0.05023    |
| Arco_P13_1_2_3_3 | 0.00134        | 0.04855    | 0.04859    | 0.04852    | 0.04852    |
| Arco_P15_1_3_3_4 | 0.58557        | 0.00024    | 0.04903    | 0.00013    | 0.04908    |

| Name             | $\Delta_{def}$ | Symmetric  |            | General    |            |
|------------------|----------------|------------|------------|------------|------------|
|                  |                | $\Delta_l$ | $\Delta_a$ | $\Delta_l$ | $\Delta_a$ |
| Arco_P16_2_4_2_4 | -0.00403       | 0.00001    | 0.05020    | 0.00091    | 0.05040    |
| Arco_P13_2_1_3_3 | 0.08914        | 0.03153    | 0.05202    | 0.02884    | 0.05259    |
| Arco_P15_1_2_3_5 | 0.00148        | 0.05558    | 0.05568    | 0.05550    | 0.05571    |
| Arco_P16_1_4_3_4 | -0.00110       | 0.00001    | 0.05621    | 0.00022    | 0.05627    |
| Arco_P15_1_3_2_5 | -0.00094       | 0.05615    | 0.05633    | 0.05638    | 0.05638    |
| Arco_P15_2_2_4_3 | -0.00157       | 0.05631    | 0.05635    | 0.05640    | 0.05657    |
| Arco_P17_1_4_4_4 | -0.00264       | 0.00003    | 0.05639    | 0.00006    | 0.05654    |
| Arco_P17_3_4_2_4 | -0.09469       | 0.05636    | 0.05643    | 0.06196    | 0.06238    |
| Arco_P13_1_2_4_2 | -0.14929       | 0.05687    | 0.05689    | 0.06627    | 0.06607    |
| Arco_P15_2_2_5_2 | -0.06117       | 0.05715    | 0.05713    | 0.06076    | 0.06076    |
| Arco_P17_3_2_6_2 | -0.02627       | 0.05678    | 0.05732    | 0.05886    | 0.05885    |
| Arco_P15_1_4_2_4 | -0.00125       | 0.05825    | 0.05858    | 0.05862    | 0.05865    |
| Arco_P17_3_3_3_4 | 0.01630        | 0.06014    | 0.06015    | 0.05917    | 0.05937    |
| Arco_P17_2_4_2_5 | -0.00045       | 0.06115    | 0.06128    | 0.06136    | 0.06131    |
| Arco_P13_3_2_2_2 | -0.07146       | 0.06139    | 0.06139    | 0.06780    | 0.06594    |
| Arco_P16_1_3_3_5 | -0.00047       | 0.06170    | 0.06191    | 0.06194    | 0.06194    |
| Arco_P10_2_1_2_1 | -0.02962       | 0.00000    | 0.06250    | 0.03223    | 0.06438    |
| Arco_P16_1_3_4_4 | 0.00414        | 0.06361    | 0.06364    | 0.06335    | 0.06371    |
| Arco_P10_1_2_1_2 | -0.00212       | 0.00003    | 0.06406    | 0.00177    | 0.06420    |
| Arco_P15_3_2_4_2 | 0.00009        | 0.06602    | 0.06629    | 0.06625    | 0.06628    |
| Arco_P15_2_3_2_4 | 0.00203        | 0.06656    | 0.06649    | 0.06642    | 0.06644    |
| Arco_P17_1_4_3_5 | -0.00121       | 0.06703    | 0.06704    | 0.06711    | 0.06713    |
| Arco_P16_1_3_2_6 | -0.00037       | 0.06703    | 0.06747    | 0.06730    | 0.06750    |
| Arco_P12_1_1_3_3 | -0.00013       | 0.06797    | 0.06800    | 0.06801    | 0.06801    |
| Arco_P16_1_4_2_5 | -0.00069       | 0.06803    | 0.06805    | 0.06809    | 0.06810    |
| Arco_P17_1_3_4_5 | -0.00147       | 0.06794    | 0.06812    | 0.06806    | 0.06822    |
| Arco_P15_4_2_3_2 | -0.06657       | 0.06817    | 0.06821    | 0.07299    | 0.07291    |
| Arco_P9_1_1_2_1  | 0.04877        | 0.00743    | 0.06954    | 0.00708    | 0.06959    |
| Arco_P17_4_2_5_2 | 0.00651        | 0.07104    | 0.07102    | 0.07058    | 0.07059    |
| Arco_P17_5_2_4_2 | -0.01534       | 0.07103    | 0.07113    | 0.07215    | 0.07223    |
| Arco_P16_3_2_3_4 | -0.00009       | 0.07108    | 0.07114    | 0.07115    | 0.07115    |
| Arco_P17_1_3_3_6 | 0.00007        | 0.07123    | 0.07126    | 0.07122    | 0.07129    |
| Arco_P14_2_2_2_4 | 0.00023        | 0.07157    | 0.07164    | 0.07161    | 0.07162    |
| Arco_P15_1_2_4_4 | -0.00049       | 0.07362    | 0.07366    | 0.07370    | 0.07370    |
| Arco_P17_1_4_2_6 | -0.00158       | 0.00001    | 0.07418    | 0.00160    | 0.07430    |

| Name             | $\Delta_{def}$ | Symmetric  |            | General    |            |
|------------------|----------------|------------|------------|------------|------------|
|                  |                | $\Delta_l$ | $\Delta_a$ | $\Delta_l$ | $\Delta_a$ |
| Arco_P17_3_2_5_3 | 0.02308        | 0.07311    | 0.07445    | 0.07297    | 0.07275    |
| Arco_P10_1_1_3_1 | -0.07465       | 0.07507    | 0.07507    | 0.08089    | 0.08156    |
| Arco_P17_1_5_2_5 | -0.00284       | 0.07592    | 0.07600    | 0.07621    | 0.07622    |
| Arco_P12_2_1_3_2 | -0.00009       | 0.07687    | 0.07694    | 0.07695    | 0.07695    |
| Arco_P16_2_3_2_5 | 0.00033        | 0.07804    | 0.07803    | 0.07801    | 0.07801    |
| Arco_P17_2_2_5_4 | -0.00028       | 0.07946    | 0.07949    | 0.07951    | 0.07951    |
| Arco_P17_2_3_2_6 | 0.00094        | 0.07990    | 0.08005    | 0.08014    | 0.07997    |
| Arco_P16_3_3_2_4 | -0.10159       | 0.08299    | 0.08298    | 0.09226    | 0.09186    |
| Arco_P14_2_1_4_3 | 0.00327        | 0.08294    | 0.08419    | 0.08267    | 0.08447    |
| Arco_P13_2_2_2_3 | 0.00744        | 0.08575    | 0.08581    | 0.08511    | 0.08593    |
| Arco_P11_2_1_3_1 | -0.06208       | 0.07701    | 0.08642    | 0.09805    | 0.09196    |
| Arco_P15_3_1_4_3 | 0.05428        | 0.05321    | 0.08727    | 0.05040    | 0.08771    |
| Arco_P15_3_2_3_3 | 0.03259        | 0.09066    | 0.09067    | 0.08776    | 0.08776    |
| Arco_P9_1_1_1_2  | 0.00258        | 0.09123    | 0.09122    | 0.09099    | 0.09099    |
| Arco_P17_1_3_5_4 | -0.03078       | 0.09303    | 0.09303    | 0.09598    | 0.09594    |
| Arco_P14_3_1_3_3 | -0.00050       | 0.09361    | 0.09373    | 0.09379    | 0.09378    |
| Arco_P17_4_2_4_3 | 0.02076        | 0.09753    | 0.09766    | 0.09565    | 0.09565    |
| Arco_P11_1_2_1_3 | 0.00286        | 0.09976    | 0.09973    | 0.09947    | 0.09947    |

## 3.29 Asc

### 3.29.1 Comparison

| Name              | $\Delta_{def}$ | Symmetric  |            | General    |            |
|-------------------|----------------|------------|------------|------------|------------|
|                   |                | $\Delta_l$ | $\Delta_a$ | $\Delta_l$ | $\Delta_a$ |
| Asc_P11_2_1_1_1_1 | 0.00618        | 0.00499    | 0.00273    | 0.00496    | 0.00272    |
| Asc_P17_4_2_1_3_2 | -0.00073       | 0.09923    | 0.09933    | 0.09941    | 0.09940    |
| Asc_P16_3_2_2_2_2 | 0.00008        | 0.03510    | 0.03507    | 0.03510    | 0.03511    |
| Asc_P15_3_2_1_2_2 | 0.00030        | 0.05613    | 0.05613    | 0.05611    | 0.05614    |
| Asc_P17_2_3_1_3_3 | -0.00056       | 0.08456    | 0.08468    | 0.08472    | 0.08473    |
| Asc_P15_4_1_3_1_1 | 0.00045        | 0.08520    | 0.08555    | 0.08548    | 0.08551    |
| Asc_P14_4_1_2_1_1 | 0.00733        | 0.08732    | 0.07956    | 0.08715    | 0.07898    |
| Asc_P16_3_3_1_2_2 | -0.00014       | 0.09540    | 0.09539    | 0.09541    | 0.09546    |
| Asc_P17_3_2_3_2_2 | 0.01006        | 0.09547    | 0.09541    | 0.09546    | 0.09445    |
| Asc_P12_3_1_1_1_1 | 0.01711        | 0.09789    | 0.04364    | 0.09990    | 0.04290    |
| Asc_P15_2_3_1_2_2 | -0.00005       | 0.09916    | 0.09917    | 0.09917    | 0.09917    |
| Asc_P12_2_1_2_1_1 | 0.00011        | 0.09777    | 0.06117    | 0.09799    | 0.06116    |
| Asc_P16_2_3_1_2_3 | -0.00047       | 0.09916    | 0.09917    | 0.09921    | 0.09923    |
| Asc_P17_4_2_2_2_2 | -0.00078       | 0.02697    | 0.02699    | 0.02699    | 0.02702    |
| Asc_P13_3_1_2_1_1 | 0.00176        | 0.05042    | 0.05042    | 0.05033    | 0.05039    |
| Asc_P14_2_2_1_2_2 | -0.00021       | 0.05575    | 0.05577    | 0.05578    | 0.05578    |
| Asc_P17_2_3_2_2_3 | -0.00039       | 0.08081    | 0.08104    | 0.08105    | 0.08107    |
| Asc_P16_4_2_1_2_2 | -0.00021       | 0.09379    | 0.09378    | 0.09381    | 0.09389    |
| Asc_P15_2_2_2_2_2 | 0.00038        | 0.09472    | 0.09472    | 0.09471    | 0.09468    |
| Asc_P17_3_3_2_2_2 | 0.00033        | 0.09487    | 0.09483    | 0.09484    | 0.09486    |
| Asc_P14_3_1_3_1_1 | 0.00618        | 0.09500    | 0.08969    | 0.09441    | 0.08923    |
| Asc_P17_3_2_2_2_3 | -0.00065       | 0.09955    | 0.09962    | 0.09964    | 0.09968    |

### 3.30 Asd

#### 3.30.1 Missing

| Name              | General    |            |
|-------------------|------------|------------|
|                   | $\Delta_l$ | $\Delta_a$ |
| Asd_P15_4_1_3_1_1 | 0.06145    | 0.07458    |
| Asd_P15_5_1_2_1_1 | 0.09550    | 0.09610    |
| Asd_P16_5_1_3_1_1 | 0.08238    | 0.08240    |
| Asd_P16_3_3_1_2_2 | 0.08803    | 0.08802    |
| Asd_P17_5_2_1_2_2 | 0.07894    | 0.07937    |
| Asd_P17_3_3_1_2_3 | 0.09139    | 0.09150    |
| Asd_P17_4_3_1_2_2 | 0.09126    | 0.09156    |
| Asd_P17_5_1_4_1_1 | 0.09772    | 0.09772    |

#### 3.30.2 Comparison

| Name              | $\Delta_{def}$ | Symmetric  |            | General    |            |
|-------------------|----------------|------------|------------|------------|------------|
|                   |                | $\Delta_l$ | $\Delta_a$ | $\Delta_l$ | $\Delta_a$ |
| Asd_P16_4_2_1_2_2 | -0.00104       | 0.03598    | 0.05405    | 0.05411    | 0.05411    |
| Asd_P14_4_1_2_1_1 | 0.13232        | 0.06087    | 0.06109    | 0.05351    | 0.05351    |
| Asd_P16_3_2_2_2_2 | 0.00873        | 0.06740    | 0.07012    | 0.06956    | 0.06951    |
| Asd_P17_4_2_2_2_2 | 0.74850        | 0.04695    | 0.04679    | 0.02138    | 0.02137    |
| Asd_P12_3_1_1_1_1 | 0.00498        | 0.03074    | 0.03078    | 0.03063    | 0.03063    |
| Asd_P11_2_1_1_1_1 | 0.00018        | 0.05973    | 0.05929    | 0.05972    | 0.05971    |
| Asd_P15_3_2_1_2_2 | 0.27310        | 0.04288    | 0.04387    | 0.03258    | 0.04425    |
| Asd_P13_3_1_2_1_1 | 0.53299        | 0.09479    | 0.04749    | 0.05490    | 0.04875    |
| Asd_P16_2_3_1_2_3 | -0.00182       | 0.09427    | 0.09721    | 0.09716    | 0.09739    |
| Asd_P14_2_2_1_2_2 | 0.07136        | 0.09030    | 0.09566    | 0.08906    | 0.08907    |

## References

- [1] Piette Bernard M. A. G., Kowalczyk Agnieszka and Heddle Jonathan G. *Characterization of near-miss connectivity-invariant homogeneous convex polyhedral cages* Proc. R. Soc. A. 478:20210679 <http://doi.org/10.1098/rspa.2021.0679>
- [2] H.S.M. Coxeter, *Regular polytopes* (Dover Publications, Mineola, NY, USA, 1973).



- [3] M.A. Armstrong, *Groups and symmetry* (Springer-Verlag, New York, NY, USA, 1988).
- [4] M. Hamermesh, *Group theory and its application to physical problems* (Addison-Wesley Publishing Co., Inc., Reading, MA, USA, 1962).
- [5] The GAP Group, *GAP - Groups, Algorithms, and Programming*, Version 4.10.2; 2019 (<https://www.gap-system.org>).
